# Supplementary material for: Eutrophication trends in the coastal region of the Great Tokyo area based on long-term trends of Secchi depth
Source: PeerJ. 2023 Jul 28;11:e15764. doi: 10.7717/peerj.15764 (PMC10389074; doi:10.7717/peerj.15764)
Supplement: Supplemental Information 5 — SE and DF denote standard errors and degree of freedom, respectively. [file peerj-11-15764-s005.xlsx]

## Sheet: Table_S1
Table S1 The statistical results of time-series analysis of temperature. SE and DF denote standard errors and degree of freedom, respectively.
Parameters	Area	Month	Coefficent	SE of coefficent	Intercept	SE of intercept	DF	t value	p value
Temperature	Tokyo Bay	1	0.0313883	0.00782475	-51.1151	15.5914	58	4.01141	0.000174982
		2	0.0282376	0.00648953	-46.4525	12.9309	58	4.35126	5.558e-05
		3	0.0266973	0.00726862	-42.9651	14.4833	58	3.67296	0.000524392
		4	0.0261693	0.00625305	-39.5537	12.4597	58	4.18505	9.78998e-05
		5	0.00990612	0.00438905	-3.43198	8.7455	58	2.25701	0.0277897
		6	0.0207288	0.00719746	-22.5243	14.3415	58	2.88002	0.00556285
		7	0.0234644	0.0100259	-26.0868	19.9773	58	2.34039	0.022725
		8	0.00201383	0.00980646	19.5882	19.5401	58	0.205358	0.838012
		9	0.0176775	0.00928276	-11.0359	18.4966	58	1.90434	0.0618297
		10	0.0234886	0.00802828	-25.3291	15.997	58	2.92573	0.00489855
		11	0.0256443	0.00728502	-32.7065	14.516	58	3.52014	0.000846875
		12	0.0299021	0.00894572	-44.5873	17.825	58	3.34262	0.00145765
		Annual	0.0222292	0.00279646	-32.8704	5.57379	707	7.94907	7.43553e-15
	Uraga Channel	1	-0.00150974	0.00972648	17.6903	19.3807	58	-0.15522	0.877187
		2	0.0156155	0.0103512	-17.7696	20.6256	58	1.50857	0.136838
		3	0.0216682	0.0101464	-30.7359	20.2174	58	2.13556	0.0369491
		4	0.01571	0.00596672	-17.6945	11.8891	58	2.63294	0.0108317
		5	0.00687479	0.00617507	2.83364	12.3043	58	1.11331	0.270166
		6	0.0118409	0.00800414	-4.74465	15.9489	58	1.47935	0.144458
		7	0.0170414	0.00931305	-13.3466	18.557	58	1.82984	0.0724139
		8	0.0195675	0.00814952	-15.3959	16.2385	58	2.40106	0.0195744
		9	0.00243124	0.00768159	19.3552	15.3061	58	0.316502	0.752758
		10	0.0215543	0.00772932	-20.8798	15.4013	58	2.78864	0.00714729
		11	0.0194384	0.00822567	-19.5583	16.3903	58	2.36314	0.021494
		12	0.0176757	0.00973871	-18.6195	19.4051	58	1.815	0.0746962
		Annual	0.0139991	0.00285431	-13.2127	5.68919	707	4.90453	1.16294e-06
	Sagami Nada	1	0.00654692	0.00952747	3.57008	18.9937	56	0.687162	0.494816
		2	0.0139561	0.00581721	-12.2883	11.597	56	2.3991	0.0197887
		3	0.0166868	0.0105381	-18.0533	21.0084	56	1.58347	0.118945
		4	0.0100976	0.00844089	-4.24603	16.8275	56	1.19627	0.236632
		5	0.00382128	0.0126006	10.5233	25.1203	56	0.303261	0.762815
		6	0.00668141	0.00784699	6.57006	15.6435	56	0.851462	0.398139
		7	-0.0054558	0.00997973	32.3226	19.8953	56	-0.546689	0.586765
		8	0.0229433	0.0104047	-21.45	20.7426	56	2.20509	0.0315711
		9	0.00768728	0.00754617	9.72986	15.0438	56	1.0187	0.312726
		10	0.0093426	0.00916575	4.94943	18.2726	56	1.01929	0.312447
		11	0.00862418	0.00971396	4.06318	19.3655	56	0.887814	0.378438
		12	0.0282015	0.0103373	-37.4196	20.6082	56	2.72813	0.00849277
		Annual	0.0108627	0.00331737	-5.03217	6.61524	683	3.27449	0.00111193
	Sagami Bay	1	0.0103058	0.0076412	-4.60317	15.2333	56	1.34871	0.182859
		2	0.0156586	0.00795429	-16.3405	15.8575	56	1.96857	0.05396
		3	0.0187078	0.00736576	-22.6569	14.6842	56	2.53983	0.0138928
		4	0.0205283	0.00738397	-25.483	14.7205	56	2.78012	0.0073864
		5	0.0175416	0.00926991	-17.3052	18.4802	56	1.89232	0.0636222
		6	0.00196259	0.00954216	16.0888	19.023	56	0.205675	0.83779
		7	0.0116595	0.0109964	-1.52422	21.9221	56	1.0603	0.293562
		8	0.027182	0.00925824	-29.7915	18.4569	56	2.93598	0.00481609
		9	0.0247628	0.00623611	-24.514	12.4321	56	3.97086	0.000206416
		10	0.0282802	0.00539186	-33.2385	10.749	56	5.24498	2.47463e-06
		11	0.0205011	0.00607088	-20.0897	12.1027	56	3.37696	0.0013384
		12	0.0335764	0.00952876	-48.6344	18.9963	56	3.52369	0.000855581
		Annual	0.0192396	0.00301016	-22.4152	6.00255	683	6.39156	3.04111e-10
