# Supplementary material for: Eutrophication trends in the coastal region of the Great Tokyo area based on long-term trends of Secchi depth
Source: PeerJ. 2023 Jul 28;11:e15764. doi: 10.7717/peerj.15764 (PMC10389074; doi:10.7717/peerj.15764)
Supplement: Supplemental Information 6 — SE and DF denote standard errors and degree of freedom, respectively. [file peerj-11-15764-s006.xlsx]

## Sheet: Table_S2
Table S2 The statistical results of time-series analysis of salinity. SE denote standard errors.
Parameters	Area	Month	Coefficent	SE of coefficent	Intercept	SE of intercept	DF	t value	p value
Salinity	Tokyo Bay	1	-0.000158225	0.00240423	32.8796	4.7906	58	-0.065811	0.947755
		2	-0.00168331	0.00258437	35.9029	5.14955	58	-0.651343	0.517398
		3	-0.000934613	0.00209829	34.3931	4.181	58	-0.445417	0.657677
		4	-0.00447326	0.00268002	41.1396	5.34015	58	-1.66911	0.100485
		5	0.00370234	0.00465121	24.6387	9.26789	58	0.795995	0.429281
		6	-0.00855368	0.00438039	48.9504	8.72826	58	-1.95272	0.0556842
		7	-0.000819753	0.0076971	33.1433	15.337	58	-0.106502	0.915552
		8	0.00309717	0.00611769	25.2594	12.19	58	0.506265	0.61459
		9	-0.00738202	0.00731868	45.7039	14.583	58	-1.00865	0.31733
		10	-0.0227192	0.00627147	76.3375	12.4964	58	-3.62263	0.000614786
		11	-0.00145492	0.00361798	34.7711	7.2091	58	-0.402137	0.689061
		12	-0.00645276	0.00377256	45.0846	7.51712	58	-1.71045	0.0925282
		Annual	-0.00396911	0.00175109	40.4732	3.49025	707	-2.26665	0.0237128
	Uraga Channel	1	-0.00544767	0.00296875	44.8813	5.91546	58	-1.835	0.0716348
		2	-0.0040488	0.00334978	42.092	6.67468	58	-1.20868	0.231692
		3	-9.29321e-05	0.00305375	33.9684	6.08483	58	-0.0304321	0.975827
		4	-0.00506286	0.00313262	43.6432	6.24199	58	-1.61617	0.111484
		5	-0.00281096	0.00426714	39.0353	8.50261	58	-0.658746	0.512665
		6	-0.00831704	0.00489534	49.8335	9.75434	58	-1.69897	0.0946835
		7	-0.00702574	0.00501602	46.921	9.9948	58	-1.40066	0.166643
		8	0.000257879	0.00429837	32.4507	8.56483	58	0.0599946	0.952366
		9	-0.00121201	0.00681722	35.0518	13.5838	58	-0.177786	0.85951
		10	-0.0117155	0.00465611	55.8928	9.27764	58	-2.51615	0.0146539
		11	-0.00542911	0.00310739	43.9378	6.1917	58	-1.74716	0.0859023
		12	-0.00726786	0.0040822	47.9856	8.13409	58	-1.78038	0.0802515
		Annual	-0.00476426	0.00136914	43.52	2.72901	707	-3.47973	0.000532704
	Sagami Nada	1	-0.00135763	0.000604564	37.3258	1.20524	56	-2.24564	0.0286921
		2	-0.000730632	0.000518664	36.1082	1.03399	56	-1.40868	0.164458
		3	-0.000987067	0.000933685	36.5879	1.86137	56	-1.05717	0.294972
		4	-0.00036962	0.00154651	35.3142	3.08307	56	-0.239003	0.811976
		5	-0.000806594	0.00107054	36.1	2.1342	56	-0.753445	0.454339
		6	-4.16697e-05	0.00120735	34.4254	2.40694	56	-0.0345134	0.972591
		7	-0.0011817	0.00166492	36.4226	3.31914	56	-0.709763	0.480796
		8	-0.00298035	0.00210814	39.8654	4.20273	56	-1.41374	0.162975
		9	-0.00255015	0.00252741	38.9615	5.03857	56	-1.009	0.317316
		10	-0.000974021	0.0026143	35.8785	5.2118	56	-0.372574	0.710872
		11	-0.0029759	0.00155172	40.1539	3.09346	56	-1.91781	0.06024
		12	-0.00199868	0.000883834	38.4631	1.76199	56	-2.26138	0.0276388
		Annual	-0.00141583	0.000647019	37.4422	1.29021	683	-2.18823	0.0289905
	Sagami Bay	1	-0.00160758	0.0010106	37.7623	2.01471	56	-1.59071	0.117304
		2	-0.000956369	0.000858271	36.5	1.71102	56	-1.1143	0.269911
		3	-0.00140033	0.000887719	37.351	1.76973	56	-1.57745	0.120324
		4	5.05592e-05	0.0016041	34.2924	3.19788	56	0.0315188	0.974968
		5	0.000891737	0.00129605	32.469	2.58377	56	0.688041	0.494267
		6	0.000150807	0.00165185	33.7602	3.29309	56	0.0912955	0.927584
		7	0.0045801	0.00356564	24.48	7.10835	56	1.28451	0.204252
		8	-0.00204839	0.00411923	37.6533	8.21198	56	-0.497274	0.620943
		9	-0.000829219	0.00335998	35.1207	6.69836	56	-0.246793	0.805971
		10	-0.00168276	0.00333172	36.9727	6.64201	56	-0.505073	0.61549
		11	-0.00681259	0.00165076	47.6149	3.29091	56	-4.12693	0.000123334
		12	-0.00133979	0.00125074	37.0611	2.49344	56	-1.0712	0.288676
		Annual	-0.000911634	0.000906638	36.3751	1.80796	683	-1.00551	0.315007
