# Supplementary material for: Eutrophication trends in the coastal region of the Great Tokyo area based on long-term trends of Secchi depth
Source: PeerJ. 2023 Jul 28;11:e15764. doi: 10.7717/peerj.15764 (PMC10389074; doi:10.7717/peerj.15764)
Supplement: Supplemental Information 7 — SE and DF denote standard errors and degree of freedom, respectively. [file peerj-11-15764-s007.xlsx]

## Sheet: Table_S3
Table S3 The statistical results of time-series analysis of nitrite concentration. SE denote standard errors.
Parameters	Area	Month	Coefficent	SE of coefficent	Intercept	SE of intercept	DF	t value	p value
Nitrite	Tokyo Bay	1	0.0115809	0.0062889	-20.0841	12.5311	58	1.84148	0.0706662
		2	-0.00773057	0.00455779	17.8467	9.08175	58	-1.69612	0.0952248
		3	-0.0104668	0.00483198	22.9325	9.6281	58	-2.16615	0.0344224
		4	-0.00923138	0.00546197	20.3369	10.8834	58	-1.69012	0.0963737
		5	-0.0137985	0.00662937	29.4975	13.2096	58	-2.08143	0.0418189
		6	-0.0153498	0.00832238	32.3061	16.583	58	-1.8444	0.0702332
		7	-0.010117	0.00835752	21.7303	16.653	58	-1.21053	0.230985
		8	-0.0114952	0.00515323	23.9124	10.2682	58	-2.23069	0.0295842
		9	-0.00766792	0.00554247	16.7306	11.0438	58	-1.38348	0.171818
		10	-0.0113416	0.00558417	24.4233	11.1269	58	-2.03102	0.0468447
		11	0.003234	0.00868051	-3.99315	17.2966	58	0.372559	0.710835
		12	-0.00898299	0.0170474	20.9601	33.9682	58	-0.526943	0.600243
		Annual	-0.00779667	0.0024502	18.5254	4.88392	707	-3.18206	0.00152632
	Uraga Channel	1	-3.41455e-05	0.00534417	1.56025	10.6487	58	-0.00638931	0.994924
		2	-0.00799274	0.00521492	17.1889	10.3911	58	-1.53267	0.130795
		3	-0.00844099	0.00421043	17.9645	8.3896	58	-2.00478	0.0496616
		4	-0.00810603	0.00410967	17.2752	8.18884	58	-1.97243	0.0533348
		5	-0.0141395	0.00684404	29.358	13.6373	58	-2.06596	0.0433091
		6	-0.0116787	0.00603928	24.1497	12.0337	58	-1.93379	0.0580234
		7	-0.00910175	0.00992413	19.1223	19.7746	58	-0.917133	0.362871
		8	-0.00989904	0.010135	20.2998	20.1947	58	-0.976719	0.332764
		9	-0.00841049	0.00434679	17.6167	8.66132	58	-1.93487	0.0578876
		10	-0.0101355	0.00389998	21.5103	7.77101	58	-2.59886	0.0118408
		11	-0.00340588	0.00624062	8.33515	12.4349	58	-0.54576	0.587324
		12	-0.00248583	0.00612288	6.66227	12.2003	58	-0.40599	0.686244
		Annual	-0.00808849	0.00195573	17.61	3.89803	707	-4.1358	3.96255e-05
	Sagami Nada	1	-0.00202544	0.0021953	4.58598	4.37431	58	-0.922625	0.360025
		2	-0.00315795	0.00238169	6.83109	4.74571	58	-1.32593	0.190063
		3	-0.00470252	0.0020157	9.92178	4.01644	58	-2.33295	0.023141
		4	-0.00447049	0.00212547	9.39605	4.23517	58	-2.10329	0.0397888
		5	-0.00487659	0.00211488	10.0531	4.21406	58	-2.30584	0.0247141
		6	0.0004369	0.00679549	-0.500097	13.5405	58	0.0642926	0.948958
		7	-0.00256143	0.00240152	5.35329	4.78521	58	-1.06659	0.290579
		8	-0.00156688	0.00129247	3.28125	2.57535	58	-1.21231	0.230309
		9	-0.00197728	0.00135058	4.14076	2.69113	58	-1.46403	0.148585
		10	-0.00211914	0.00360592	4.70332	7.18508	58	-0.587684	0.559026
		11	-0.00467712	0.00251442	9.88072	5.01017	58	-1.86012	0.0679417
		12	-0.0033713	0.00361403	7.34169	7.20123	58	-0.932836	0.354772
		Annual	-0.00294936	0.000881657	6.42892	1.7574	707	-3.34525	0.000865519
	Sagami Bay	1	-0.00087268	0.00130207	2.26368	2.59447	58	-0.670227	0.505373
		2	-0.0011979	0.00106235	2.86716	2.11681	58	-1.1276	0.264133
		3	-0.000891635	0.000872008	2.22356	1.73754	58	-1.02251	0.310786
		4	-0.00250758	0.00179128	5.41789	3.56927	58	-1.39988	0.166876
		5	-0.00119259	0.00199068	2.62061	3.96657	58	-0.59909	0.551446
		6	-0.00100382	0.00125656	2.17915	2.50379	58	-0.798864	0.427629
		7	-0.000679591	0.00218998	1.53749	4.3637	58	-0.310319	0.757431
		8	-0.000590825	0.000992997	1.30598	1.97862	58	-0.594991	0.554164
		9	-0.000936595	0.0013432	2.03387	2.67642	58	-0.697289	0.488408
		10	-0.00439506	0.00151864	9.17251	3.026	58	-2.89409	0.00535007
		11	-0.00355666	0.00368076	7.71915	7.33419	58	-0.966285	0.337913
		12	-0.00294347	0.00168128	6.4786	3.35009	58	-1.75073	0.0852808
		Annual	-0.00175224	0.000575205	4.01706	1.14649	707	-3.04629	0.00240306
