# Supplementary material for: Eutrophication trends in the coastal region of the Great Tokyo area based on long-term trends of Secchi depth
Source: PeerJ. 2023 Jul 28;11:e15764. doi: 10.7717/peerj.15764 (PMC10389074; doi:10.7717/peerj.15764)
Supplement: Supplemental Information 8 — SE and DF denote standard errors and degree of freedom, respectively. [file peerj-11-15764-s008.xlsx]

## Sheet: Table_S4
Table S4 The statistical results of time-series analysis of phosphate concentration. SE denote standard errors.
Parameters	Area	Month	Coefficent	SE of coefficent	Intercept	SE of intercept	DF	t value	p value
Phosphate	Tokyo Bay	1	-0.0106784	0.00428898	22.3101	8.54613	58	-2.48973	0.0156727
		2	-0.00736178	0.0034685	15.4344	6.91126	58	-2.12247	0.0380791
		3	-0.00607939	0.00277497	12.6265	5.52933	58	-2.1908	0.0324984
		4	-0.0083613	0.00229922	17.2696	4.58136	58	-3.63659	0.000588323
		5	-0.00525317	0.00382778	11.015	7.62714	58	-1.37238	0.17523
		6	-0.00718154	0.00478045	14.9777	9.52542	58	-1.50227	0.138452
		7	-0.00298768	0.00343696	6.78735	6.8484	58	-0.869282	0.388276
		8	-0.0116249	0.00567056	24.1835	11.299	58	-2.05004	0.0448898
		9	-0.00611979	0.00375175	13.2516	7.47564	58	-1.63118	0.10827
		10	-0.0167007	0.0148387	34.6933	29.5673	58	-1.12548	0.265022
		11	-0.00914345	0.00384067	19.2597	7.65283	58	-2.38069	0.0205856
		12	-0.00729646	0.00332446	15.6421	6.62425	58	-2.19478	0.0321966
		Annual	-0.00840116	0.00182569	17.7747	3.639	707	-4.60164	4.96838e-06
	Uraga Channel	1	-0.00534037	0.00204921	11.3081	4.08321	58	-2.60606	0.0116205
		2	-0.00501375	0.00175003	10.5949	3.48707	58	-2.86495	0.0057995
		3	-0.0042854	0.00173098	9.06969	3.44911	58	-2.47571	0.0162387
		4	-0.00537975	0.00195465	11.2266	3.89478	58	-2.75229	0.00788596
		5	-0.00478577	0.00227318	9.9423	4.52948	58	-2.10532	0.0396044
		6	-0.00427361	0.00220221	8.86389	4.38808	58	-1.9406	0.057173
		7	-0.00238487	0.00186691	5.2098	3.71997	58	-1.27744	0.206536
		8	-0.0108363	0.00354996	22.1471	7.07357	58	-3.0525	0.00342184
		9	-0.00377636	0.0025245	8.08539	5.03025	58	-1.49589	0.140105
		10	-0.00837249	0.00791929	17.4931	15.7798	58	-1.05723	0.294791
		11	-0.00601009	0.0023148	12.6437	4.61241	58	-2.59638	0.0119173
		12	-0.0046659	0.00213185	10.0074	4.24788	58	-2.18866	0.0326616
		Annual	-0.00550462	0.00102688	11.6357	2.0468	707	-5.36055	1.12442e-07
	Sagami Nada	1	-0.0016781	0.00101079	3.77018	2.01408	58	-1.66019	0.102275
		2	-0.00295001	0.00136072	6.3328	2.71135	58	-2.16797	0.0342773
		3	-0.00216548	0.00179741	4.76971	3.58148	58	-1.20478	0.233183
		4	-0.00129827	0.00102506	2.89156	2.0425	58	-1.26654	0.210384
		5	-0.00159599	0.0016961	3.38796	3.37961	58	-0.940977	0.35062
		6	-0.00112477	0.000990476	2.40132	1.9736	58	-1.13558	0.260803
		7	-0.00309169	0.00216764	6.38542	4.31919	58	-1.42629	0.159145
		8	-0.00178636	0.00161457	3.71754	3.21714	58	-1.1064	0.27312
		9	-0.00255096	0.00164763	5.26015	3.28304	58	-1.54826	0.127
		10	-0.00200828	0.00446458	4.31245	8.89601	58	-0.449826	0.654513
		11	-0.00176876	0.00122592	3.80008	2.44274	58	-1.4428	0.154455
		12	-0.00446676	0.00252332	9.26275	5.0279	58	-1.77019	0.0819506
		Annual	-0.00222779	0.000593463	4.86538	1.18296	707	-3.75389	0.000188416
	Sagami Bay	1	-0.00087299	0.00124257	2.16111	2.47591	58	-0.702568	0.485135
		2	-0.00298997	0.00135314	6.47674	2.69624	58	-2.20965	0.0310909
		3	-0.00114803	0.0012257	2.72826	2.44229	58	-0.936632	0.352832
		4	-0.00226647	0.00102296	4.82618	2.03833	58	-2.2156	0.0306584
		5	4.56904e-05	0.000533775	0.0345793	1.06359	58	0.0855986	0.93208
		6	-2.26656e-05	0.000996402	0.164295	1.98541	58	-0.0227475	0.98193
		7	-0.00192899	0.00120169	4.01328	2.39446	58	-1.60523	0.113876
		8	-0.00231803	0.000827851	4.78775	1.64956	58	-2.80006	0.00692879
		9	-0.000206025	0.000766687	0.556013	1.52768	58	-0.268721	0.789098
		10	-0.00417404	0.00192658	8.5701	3.83885	58	-2.16656	0.0343902
		11	-0.00114124	0.00130786	2.49937	2.60602	58	-0.8726	0.386479
		12	-0.00268674	0.00097653	5.66034	1.94581	58	-2.75131	0.00790678
		Annual	-0.00167137	0.000362038	3.75148	0.72162	707	-4.61655	4.63427e-06
