# Supplementary material for: Eutrophication trends in the coastal region of the Great Tokyo area based on long-term trends of Secchi depth
Source: PeerJ. 2023 Jul 28;11:e15764. doi: 10.7717/peerj.15764 (PMC10389074; doi:10.7717/peerj.15764)
Supplement: Supplemental Information 9 — SE and DF denote standard errors and degree of freedom, respectively. [file peerj-11-15764-s009.xlsx]

## Sheet: Table_S5
Table S5 The statistical results of time-series analysis of Secchi depth. SE denote standard errors.
Parameters	Area	Month	Coefficent	SE of coefficent	Intercept	SE of intercept	DF	t value	p value
Secchi depth	Tokyo Bay	1	-0.0119704	-0.0267781	18.0024	-53.4235	43	0.447023	0.657102
		2	0.0206489	-0.0239445	-46.786	-47.7709	42	-0.862363	0.393385
		3	-0.0219427	-0.0198798	38.7825	-39.6583	42	1.10377	0.275977
		4	0.0424101	-0.0163451	-88.7712	-32.6069	42	-2.59467	0.012984
		5	-0.0271056	-0.024981	50.6846	-49.8382	43	1.08505	0.283948
		6	0.00126167	-0.0162991	-5.14939	-32.5174	43	-0.0774075	0.938658
		7	-0.00953835	-0.0149364	17.025	-29.7987	43	0.638598	0.526471
		8	-0.0246666	-0.00685913	47.2631	-13.6843	43	3.59616	0.000827394
		9	-0.0135361	-0.00951661	24.9506	-18.9813	42	1.42237	0.162304
		10	-0.0104518	-0.0200595	17.8067	-40.0047	41	0.521041	0.605141
		11	-0.00687171	-0.0322767	8.31294	-64.3694	41	0.2129	0.83246
		12	-0.0216798	-0.0164593	37.4652	-32.8267	41	1.31718	0.195094
		Annual	-0.00686129	-0.00642128	7.81338	-12.8131	517	1.06852	0.285783
	Uraga Channel	1	0.173316	-0.0415781	-358.208	-82.8052	50	-4.16843	0.000121549
		2	0.197629	-0.0533856	-406.539	-106.312	48	-3.70192	0.000551492
		3	0.0836699	-0.0302725	-176.235	-60.2838	49	-2.76389	0.00802495
		4	0.133116	-0.0254486	-273.145	-50.6775	49	-5.23077	3.4899e-06
		5	-0.0219559	-0.0261899	37.7083	-52.1587	50	0.838332	0.405834
		6	0.0635082	-0.0247455	-131.851	-49.2821	50	-2.56645	0.0133162
		7	0.0222925	-0.0323397	-48.5731	-64.4064	50	-0.689323	0.493807
		8	0.00588853	-0.0290936	-16.5029	-57.9416	50	-0.202399	0.840426
		9	0.044643	-0.0315915	-94.1901	-62.9005	49	-1.41313	0.163938
		10	0.0359646	-0.0462253	-78.9604	-92.0243	48	-0.778028	0.440371
		11	0.075076	-0.03767	-158.578	-74.9927	48	-1.99299	0.0519637
		12	0.0990839	-0.0419502	-208.175	-83.5252	49	-2.36194	0.0221972
		Annual	0.0763803	-0.012054	-165.162	-24.0099	601	-6.33652	4.61194e-10
	Sagami Nada	1	0.0419277	-0.0259603	-106.833	-51.7014	50	-1.61507	0.112589
		2	0.0840933	-0.0290087	-190.23	-57.7711	49	-2.8989	0.00558863
		3	0.0795855	-0.0524067	-177.972	-104.361	49	-1.51861	0.135286
		4	0.124872	-0.0316175	-264.302	-62.962	49	-3.94946	0.000250595
		5	0.0703792	-0.0336043	-152.878	-66.9249	50	-2.09435	0.0413179
		6	0.0971032	-0.0333252	-206.497	-66.3689	50	-2.91381	0.00532715
		7	0.0568125	-0.041048	-125.964	-81.7495	50	-1.38405	0.172491
		8	0.0340012	-0.0391567	-82.6865	-77.9828	50	-0.868337	0.389359
		9	0.0658565	-0.0364479	-147.271	-72.5595	48	-1.80687	0.077053
		10	0.0572464	-0.0292786	-130.784	-58.287	48	-1.95523	0.0563918
		11	0.0801655	-0.0290827	-178.146	-57.9053	49	-2.75646	0.00818405
		12	0.0970366	-0.0290011	-213.317	-57.7428	49	-3.34596	0.00158038
		Annual	0.0746641	-0.0105943	-172.034	-21.1039	602	-7.04761	5.001e-12
	Sagami Bay	1	0.0981698	-0.0365243	-215.353	-72.7403	50	-2.68779	0.00974279
		2	0.0940035	-0.0296014	-206.257	-58.9528	50	-3.17565	0.0025608
		3	0.0721279	-0.0305214	-159.185	-60.785	50	-2.36319	0.0220477
		4	0.0588503	-0.0306549	-128.463	-61.0453	49	-1.91977	0.0607194
		5	0.0259988	-0.0252557	-60.1068	-50.2935	49	-1.02942	0.308335
		6	0.0153106	-0.035452	-38.8251	-70.6047	50	-0.431868	0.667694
		7	-0.0164746	-0.0292887	25.257	-58.3246	49	0.56249	0.576347
		8	-0.04801	-0.0288591	86.4001	-57.4837	48	1.6636	0.102709
		9	0.0608715	-0.0322986	-130.729	-64.2818	49	-1.88464	0.0654162
		10	0.0770053	-0.0385403	-165.455	-76.7252	48	-1.99805	0.0513946
		11	0.0502416	-0.0362109	-114.127	-72.1116	48	-1.38747	0.171706
		12	0.0716117	-0.0400699	-159.418	-79.7814	49	-1.78717	0.0800961
		Annual	0.0457964	-0.011009	-111.067	-21.9304	600	-4.15991	3.64887e-05
