# Supplementary material for: Eutrophication trends in the coastal region of the Great Tokyo area based on long-term trends of Secchi depth
Source: PeerJ. 2023 Jul 28;11:e15764. doi: 10.7717/peerj.15764 (PMC10389074; doi:10.7717/peerj.15764)
Supplement: Supplemental Information 10 — ∆T, ∆S, ∆NO2, ∆PO4, and ∆K denote the difference from monthly median values of temperature, salinity, nitrite concentration, phosphate concentration, and Kuroshio axis position, respectively. [file peerj-11-15764-s010.xlsx]

## Sheet: Table_S6
Table S6 The statistical results of correlated analyses of Eq (4). ∆T, ∆S, ∆NO2, ∆PO4, and ∆K denote the differnece from montly median values of temperature, salinity, nitrite concentration, phosphate concentration, and Kuroshio axis positon, respectively.
Area	Parameter	Estimate	Std. Error	t-value	p-value
Tokyo Bay	Intercept	0.217019	0.0800725	2.71029	0.00697433
	∆S	0.269301	0.124424	2.16438	0.0309505
Uraga Channel	Intercept	0.320686	0.191566	1.67402	0.0948306
	∆T	0.673253	0.137186	4.90758	1.29706e-06
	∆S	2.28868	0.282421	8.10379	5.21429e-15
	∆PO4	0.501607	0.277652	1.80661	0.0715008
	∆K	0.431893	0.239977	1.79973	0.0725821
Sagami Nada	Intercept	119.409	25.4634	4.68944	3.63144e-06
	∆T	0.903804	0.138841	6.50962	2.00236e-10
	∆S	4.6965	0.825662	5.68816	2.30657e-08
	∆NO2	-0.712128	0.327141	-2.17682	0.0300095
	∆T	-0.891109	0.465044	-1.91618	0.0559712
	Year	-0.05983	0.0127806	-4.6813	3.77177e-06
Sagami Bay	Intercept	0.0850472	0.174638	0.486992	0.626554
	∆T	0.428223	0.16574	2.5837	0.0101595
	∆S	4.49499	0.478281	9.39823	6.02271e-19
	∆NO2	-0.9894	0.64606	-1.53144	0.126521
	∆T	2.92166	0.982683	2.97315	0.0031417
