# Supplementary material for: Eutrophication trends in the coastal region of the Great Tokyo area based on long-term trends of Secchi depth
Source: PeerJ. 2023 Jul 28;11:e15764. doi: 10.7717/peerj.15764 (PMC10389074; doi:10.7717/peerj.15764)
Supplement: Supplemental Information 11 — “NA” denote the data was not available. [file peerj-11-15764-s011.xlsx]

## Sheet: Sheet1
year	month	stn	lon	lat	depth	temperature	salinity	sigma_t	NO3	NO2	NH4	PO4	water_color	transparency
1963	9	1	139.547	35.253	0	24.9	NA	NA	NA	NA	NA	NA	9	7
1963	9	1	139.547	35.253	10	24.17	NA	NA	NA	NA	NA	NA	9	7
1963	9	1	139.547	35.253	20	21.88	NA	NA	NA	NA	NA	NA	9	7
1963	9	1	139.547	35.253	30	17.64	NA	NA	NA	NA	NA	NA	9	7
1963	9	1	139.547	35.253	50	14.7	NA	NA	NA	NA	NA	NA	9	7
1963	9	2	139.455	35.25	0	24.9	NA	NA	NA	NA	NA	NA	7	7
1963	9	2	139.455	35.25	10	23.34	NA	NA	NA	NA	NA	NA	7	7
1963	9	2	139.455	35.25	20	20.35	NA	NA	NA	NA	NA	NA	7	7
1963	9	2	139.455	35.25	30	18.46	NA	NA	NA	NA	NA	NA	7	7
1963	9	2	139.455	35.25	50	14.83	NA	NA	NA	NA	NA	NA	7	7
1963	9	2	139.455	35.25	75	13.21	NA	NA	NA	NA	NA	NA	7	7
1963	9	2	139.455	35.25	100	12.35	NA	NA	NA	NA	NA	NA	7	7
1963	9	3	139.364	35.2467	0	24.9	NA	NA	NA	NA	NA	NA	6	7
1963	9	3	139.364	35.2467	10	24.49	NA	NA	NA	NA	NA	NA	6	7
1963	9	3	139.364	35.2467	20	21.51	NA	NA	NA	NA	NA	NA	6	7
1963	9	3	139.364	35.2467	30	18.06	NA	NA	NA	NA	NA	NA	6	7
1963	9	3	139.364	35.2467	50	15.61	NA	NA	NA	NA	NA	NA	6	7
1963	9	3	139.364	35.2467	75	13.52	NA	NA	NA	NA	NA	NA	6	7
1963	9	3	139.364	35.2467	100	12.57	NA	NA	NA	NA	NA	NA	6	7
1963	9	3	139.364	35.2467	150	11.06	NA	NA	NA	NA	NA	NA	6	7
1963	9	3	139.364	35.2467	200	10.12	NA	NA	NA	NA	NA	NA	6	7
1963	9	3	139.364	35.2467	300	8.06	NA	NA	NA	NA	NA	NA	6	7
1963	9	3	139.364	35.2467	400	6.61	NA	NA	NA	NA	NA	NA	6	7
1963	9	3	139.364	35.2467	500	5.38	NA	NA	NA	NA	NA	NA	6	7
1963	9	A	139.272	35.2833	0	24.7	NA	NA	NA	NA	NA	NA	7	7
1963	9	A	139.272	35.2833	10	24.19	NA	NA	NA	NA	NA	NA	7	7
1963	9	A	139.272	35.2833	20	21.73	NA	NA	NA	NA	NA	NA	7	7
1963	9	A	139.272	35.2833	30	17.38	NA	NA	NA	NA	NA	NA	7	7
1963	9	A	139.272	35.2833	50	15.34	NA	NA	NA	NA	NA	NA	7	7
1963	9	B	139.369	35.3032	0	25	NA	NA	NA	NA	NA	NA	11	1
1963	9	B	139.369	35.3032	10	24.28	NA	NA	NA	NA	NA	NA	11	1
1963	9	B	139.369	35.3032	20	21.28	NA	NA	NA	NA	NA	NA	11	1
1963	9	B	139.369	35.3032	30	18.54	NA	NA	NA	NA	NA	NA	11	1
1963	9	B	139.369	35.3032	50	16.31	NA	NA	NA	NA	NA	NA	11	1
1963	9	H	139.547	35.1948	0	24.7	NA	NA	NA	NA	NA	NA	6	6
1963	9	H	139.547	35.1948	10	23.98	NA	NA	NA	NA	NA	NA	6	6
1963	9	H	139.547	35.1948	20	19.83	NA	NA	NA	NA	NA	NA	6	6
1963	9	H	139.547	35.1948	30	17.87	NA	NA	NA	NA	NA	NA	6	6
1963	9	H	139.547	35.1948	50	14.95	NA	NA	NA	NA	NA	NA	6	6
1963	9	H	139.547	35.1948	75	12.7	NA	NA	NA	NA	NA	NA	6	6
1963	9	H	139.547	35.1948	100	12.21	NA	NA	NA	NA	NA	NA	6	6
1964	11	15	139.685	35.013	10	20.5	NA	NA	NA	NA	NA	NA	NA	NA
1965	1	1	139.547	35.253	0	15.2	34.74	NA	NA	NA	NA	NA	NA	NA
1965	1	1	139.547	35.253	10	15.4	34.74	NA	NA	NA	NA	NA	NA	NA
1965	1	1	139.547	35.253	20	15.23	34.74	NA	NA	NA	NA	NA	NA	NA
1965	1	1	139.547	35.253	30	15.23	34.72	NA	NA	NA	NA	NA	NA	NA
1965	1	10	139.455	35.1365	0	16.7	34.67	NA	NA	NA	NA	NA	NA	NA
1965	1	10	139.455	35.1365	10	15.4	34.67	NA	NA	NA	NA	NA	NA	NA
1965	1	10	139.455	35.1365	20	15.5	34.67	NA	NA	NA	NA	NA	NA	NA
1965	1	10	139.455	35.1365	30	14.8	34.67	NA	NA	NA	NA	NA	NA	NA
1965	1	10	139.455	35.1365	50	15.17	34.67	NA	NA	NA	NA	NA	NA	NA
1965	1	12	139.547	35.1365	0	15.1	34.74	NA	NA	NA	NA	NA	NA	NA
1965	1	12	139.547	35.1365	10	15.5	34.72	NA	NA	NA	NA	NA	NA	NA
1965	1	12	139.547	35.1365	20	15.6	34.72	NA	NA	NA	NA	NA	NA	NA
1965	1	12	139.547	35.1365	30	15.1	34.7	NA	NA	NA	NA	NA	NA	NA
1965	1	12	139.547	35.1365	50	15.33	34.72	NA	NA	NA	NA	NA	NA	NA
1965	1	13	139.605	35.1123	0	15.2	34.7	NA	NA	NA	NA	NA	NA	NA
1965	1	13	139.605	35.1123	10	15.5	34.72	NA	NA	NA	NA	NA	NA	NA
1965	1	13	139.605	35.1123	20	15.35	34.72	NA	NA	NA	NA	NA	NA	NA
1965	1	13	139.605	35.1123	30	15.2	34.7	NA	NA	NA	NA	NA	NA	NA
1965	1	14	139.65	35.0545	0	15.1	34.33	NA	NA	NA	NA	NA	NA	NA
1965	1	14	139.65	35.0545	10	15.3	34.33	NA	NA	NA	NA	NA	NA	NA
1965	1	14	139.65	35.0545	20	15.44	34.56	NA	NA	NA	NA	NA	NA	NA
1965	1	14	139.65	35.0545	30	15.57	34.78	NA	NA	NA	NA	NA	NA	NA
1965	1	14	139.65	35.0545	50	15.58	34.7	NA	NA	NA	NA	NA	NA	NA
1965	1	15	139.685	35.013	0	15.5	34.7	NA	NA	NA	NA	NA	NA	NA
1965	1	15	139.685	35.013	10	15.8	34.72	NA	NA	NA	NA	NA	NA	NA
1965	1	15	139.685	35.013	20	15.6	34.7	NA	NA	NA	NA	NA	NA	NA
1965	1	15	139.685	35.013	30	15.49	34.7	NA	NA	NA	NA	NA	NA	NA
1965	1	15	139.685	35.013	50	15.31	34.67	NA	NA	NA	NA	NA	NA	NA
1965	1	17	139.505	35.0548	0	15.7	34.72	NA	NA	NA	NA	NA	NA	NA
1965	1	18	139.439	35.0132	0	15.55	34.7	NA	NA	NA	NA	NA	NA	NA
1965	1	19	139.374	34.9737	0	15.7	34.72	NA	NA	NA	NA	NA	NA	NA
1965	1	19	139.374	34.9737	10	16.65	34.72	NA	NA	NA	NA	NA	NA	NA
1965	1	19	139.374	34.9737	20	15.88	34.74	NA	NA	NA	NA	NA	NA	NA
1965	1	19	139.374	34.9737	30	15.82	34.77	NA	NA	NA	NA	NA	NA	NA
1965	1	19	139.374	34.9737	50	15.83	34.14	NA	NA	NA	NA	NA	NA	NA
1965	1	19	139.374	34.9737	100	15.18	34.66	NA	NA	NA	NA	NA	NA	NA
1965	1	19	139.374	34.9737	150	14.47	34.61	NA	NA	NA	NA	NA	NA	NA
1965	1	19	139.374	34.9737	200	13.19	34.54	NA	NA	NA	NA	NA	NA	NA
1965	1	2	139.455	35.25	0	15.5	34.74	NA	NA	NA	NA	NA	NA	NA
1965	1	22	139.467	34.8248	0	16.2	34.76	NA	NA	NA	NA	NA	NA	NA
1965	1	29	139.754	35.0757	0	14.6	34.63	NA	NA	NA	NA	NA	NA	NA
1965	1	29	139.754	35.0757	10	14.8	34.61	NA	NA	NA	NA	NA	NA	NA
1965	1	29	139.754	35.0757	20	14.8	34.61	NA	NA	NA	NA	NA	NA	NA
1965	1	29	139.754	35.0757	30	14.8	34.63	NA	NA	NA	NA	NA	NA	NA
1965	1	29	139.754	35.0757	50	14.61	34.63	NA	NA	NA	NA	NA	NA	NA
1965	1	29	139.754	35.0757	75	14.6	34.63	NA	NA	NA	NA	NA	NA	NA
1965	1	29	139.754	35.0757	150	14.15	34.6	NA	NA	NA	NA	NA	NA	NA
1965	1	3	139.364	35.2467	0	15.4	34.7	NA	NA	NA	NA	NA	NA	NA
1965	1	3	139.364	35.2467	10	15.7	34.7	NA	NA	NA	NA	NA	NA	NA
1965	1	3	139.364	35.2467	20	15.6	34.7	NA	NA	NA	NA	NA	NA	NA
1965	1	3	139.364	35.2467	30	15.7	34.7	NA	NA	NA	NA	NA	NA	NA
1965	1	3	139.364	35.2467	50	15.39	34.7	NA	NA	NA	NA	NA	NA	NA
1965	1	3	139.364	35.2467	75	15.31	34.72	NA	NA	NA	NA	NA	NA	NA
1965	1	3	139.364	35.2467	100	15.29	34.72	NA	NA	NA	NA	NA	NA	NA
1965	1	3	139.364	35.2467	150	14.66	34.61	NA	NA	NA	NA	NA	NA	NA
1965	1	3	139.364	35.2467	200	12.83	34.54	NA	NA	NA	NA	NA	NA	NA
1965	1	5	139.181	35.2398	0	15.3	34.61	NA	NA	NA	NA	NA	NA	NA
1965	1	5	139.181	35.2398	10	15.6	34.67	NA	NA	NA	NA	NA	NA	NA
1965	1	5	139.181	35.2398	20	15.7	34.66	NA	NA	NA	NA	NA	NA	NA
1965	1	5	139.181	35.2398	30	15.33	34.66	NA	NA	NA	NA	NA	NA	NA
1965	1	5	139.181	35.2398	50	15.31	34.66	NA	NA	NA	NA	NA	NA	NA
1965	1	6	139.189	35.1398	0	15.7	34.74	NA	NA	NA	NA	NA	NA	NA
1965	1	6	139.189	35.1398	10	15.9	34.72	NA	NA	NA	NA	NA	NA	NA
1965	1	6	139.189	35.1398	20	15.9	34.72	NA	NA	NA	NA	NA	NA	NA
1965	1	6	139.189	35.1398	30	15.42	34.7	NA	NA	NA	NA	NA	NA	NA
1965	1	6	139.189	35.1398	50	15.37	34.7	NA	NA	NA	NA	NA	NA	NA
1965	1	6	139.189	35.1398	75	15.39	34.7	NA	NA	NA	NA	NA	NA	NA
1965	1	9	139.371	35.1362	0	15.5	34.69	NA	NA	NA	NA	NA	NA	NA
1965	1	9	139.371	35.1362	10	15.6	34.67	NA	NA	NA	NA	NA	NA	NA
1965	1	9	139.371	35.1362	20	15.7	34.69	NA	NA	NA	NA	NA	NA	NA
1965	1	9	139.371	35.1362	30	15.6	34.68	NA	NA	NA	NA	NA	NA	NA
1965	1	9	139.371	35.1362	50	15.22	34.66	NA	NA	NA	NA	NA	NA	NA
1965	1	9	139.371	35.1362	75	15.22	34.66	NA	NA	NA	NA	NA	NA	NA
1965	1	9	139.371	35.1362	100	15.19	34.66	NA	NA	NA	NA	NA	NA	NA
1965	1	9	139.371	35.1362	150	14.19	34.58	NA	NA	NA	NA	NA	NA	NA
1965	1	9	139.371	35.1362	200	12.19	34.46	NA	NA	NA	NA	NA	NA	NA
1965	2	1	139.547	35.253	0	14	34.59	NA	NA	NA	NA	NA	NA	NA
1965	2	1	139.547	35.253	10	14.2	34.58	NA	NA	NA	NA	NA	NA	NA
1965	2	1	139.547	35.253	20	13.94	34.58	NA	NA	NA	NA	NA	NA	NA
1965	2	1	139.547	35.253	30	13.95	34.58	NA	NA	NA	NA	NA	NA	NA
1965	2	10	139.455	35.1365	0	16.8	34.67	NA	NA	NA	NA	NA	NA	NA
1965	2	10	139.455	35.1365	10	14.5	34.67	NA	NA	NA	NA	NA	NA	NA
1965	2	10	139.455	35.1365	20	14.4	34.67	NA	NA	NA	NA	NA	NA	NA
1965	2	10	139.455	35.1365	30	14.4	34.67	NA	NA	NA	NA	NA	NA	NA
1965	2	12	139.547	35.1365	0	13.8	34.61	NA	NA	NA	NA	NA	NA	NA
1965	2	12	139.547	35.1365	10	13.8	34.65	NA	NA	NA	NA	NA	NA	NA
1965	2	12	139.547	35.1365	20	14.2	34.63	NA	NA	NA	NA	NA	NA	NA
1965	2	12	139.547	35.1365	30	14.08	34.61	NA	NA	NA	NA	NA	NA	NA
1965	2	13	139.605	35.1123	0	14.8	34.65	NA	NA	NA	NA	NA	NA	NA
1965	2	13	139.605	35.1123	10	15.2	34.69	NA	NA	NA	NA	NA	NA	NA
1965	2	13	139.605	35.1123	20	15.2	34.69	NA	NA	NA	NA	NA	NA	NA
1965	2	13	139.605	35.1123	30	15.07	34.69	NA	NA	NA	NA	NA	NA	NA
1965	2	14	139.65	35.0545	0	15.5	34.74	NA	NA	NA	NA	NA	NA	NA
1965	2	14	139.65	35.0545	10	15.9	34.72	NA	NA	NA	NA	NA	NA	NA
1965	2	14	139.65	35.0545	20	16	34.72	NA	NA	NA	NA	NA	NA	NA
1965	2	14	139.65	35.0545	30	15.8	34.7	NA	NA	NA	NA	NA	NA	NA
1965	2	15	139.685	35.013	0	15.7	34.7	NA	NA	NA	NA	NA	NA	NA
1965	2	15	139.685	35.013	10	15.6	34.7	NA	NA	NA	NA	NA	NA	NA
1965	2	15	139.685	35.013	20	16.1	34.54	NA	NA	NA	NA	NA	NA	NA
1965	2	15	139.685	35.013	30	15.9	34.7	NA	NA	NA	NA	NA	NA	NA
1965	2	17	139.505	35.0548	0	15.9	34.72	NA	NA	NA	NA	NA	NA	NA
1965	2	18	139.439	35.0132	0	15.9	34.72	NA	NA	NA	NA	NA	NA	NA
1965	2	19	139.374	34.9737	0	15.9	34.72	NA	NA	NA	NA	NA	NA	NA
1965	2	19	139.374	34.9737	10	15.7	34.72	NA	NA	NA	NA	NA	NA	NA
1965	2	19	139.374	34.9737	20	15.9	34.7	NA	NA	NA	NA	NA	NA	NA
1965	2	19	139.374	34.9737	30	16	34.7	NA	NA	NA	NA	NA	NA	NA
1965	2	2	139.455	35.25	0	14	34.58	NA	NA	NA	NA	NA	NA	NA
1965	2	22	139.467	34.8248	0	14.5	34.67	NA	NA	NA	NA	NA	NA	NA
1965	2	29	139.754	35.0757	0	15	34.67	NA	NA	NA	NA	NA	NA	NA
1965	2	29	139.754	35.0757	10	15.2	34.67	NA	NA	NA	NA	NA	NA	NA
1965	2	29	139.754	35.0757	20	15.2	34.67	NA	NA	NA	NA	NA	NA	NA
1965	2	29	139.754	35.0757	30	15.2	34.67	NA	NA	NA	NA	NA	NA	NA
1965	2	29	139.754	35.0757	50	14.98	34.67	NA	NA	NA	NA	NA	NA	NA
1965	2	29	139.754	35.0757	75	14.89	34.63	NA	NA	NA	NA	NA	NA	NA
1965	2	3	139.364	35.2467	0	14.4	34.61	NA	NA	NA	NA	NA	NA	NA
1965	2	3	139.364	35.2467	10	14.3	34.65	NA	NA	NA	NA	NA	NA	NA
1965	2	3	139.364	35.2467	20	14.5	34.63	NA	NA	NA	NA	NA	NA	NA
1965	2	3	139.364	35.2467	30	14.5	34.63	NA	NA	NA	NA	NA	NA	NA
1965	2	5	139.181	35.2398	0	14.1	34.61	NA	NA	NA	NA	NA	NA	NA
1965	2	5	139.181	35.2398	10	14.3	34.61	NA	NA	NA	NA	NA	NA	NA
1965	2	5	139.181	35.2398	20	14.4	34.59	NA	NA	NA	NA	NA	NA	NA
1965	2	5	139.181	35.2398	30	14.16	34.63	NA	NA	NA	NA	NA	NA	NA
1965	2	6	139.189	35.1398	0	14	34.61	NA	NA	NA	NA	NA	NA	NA
1965	2	6	139.189	35.1398	10	14	34.61	NA	NA	NA	NA	NA	NA	NA
1965	2	6	139.189	35.1398	20	14.3	34.59	NA	NA	NA	NA	NA	NA	NA
1965	2	6	139.189	35.1398	30	14.3	34.59	NA	NA	NA	NA	NA	NA	NA
1965	2	9	139.371	35.1362	0	14.3	34.63	NA	NA	NA	NA	NA	NA	NA
1965	2	9	139.371	35.1362	10	14.3	34.63	NA	NA	NA	NA	NA	NA	NA
1965	2	9	139.371	35.1362	20	14.4	34.63	NA	NA	NA	NA	NA	NA	NA
1965	2	9	139.371	35.1362	30	14.4	34.63	NA	NA	NA	NA	NA	NA	NA
1965	3	1	139.547	35.253	0	13.2	34.56	NA	NA	NA	NA	NA	NA	NA
1965	3	1	139.547	35.253	10	13.2	34.56	NA	NA	NA	NA	NA	NA	NA
1965	3	1	139.547	35.253	20	13.6	34.56	NA	NA	NA	NA	NA	NA	NA
1965	3	1	139.547	35.253	30	13.53	34.56	NA	NA	NA	NA	NA	NA	NA
1965	3	1	139.547	35.253	50	13.57	34.58	NA	NA	NA	NA	NA	NA	NA
1965	3	10	139.455	35.1365	0	8.1	34.65	NA	NA	NA	NA	NA	NA	NA
1965	3	10	139.455	35.1365	10	14.3	34.65	NA	NA	NA	NA	NA	NA	NA
1965	3	10	139.455	35.1365	20	14.2	34.65	NA	NA	NA	NA	NA	NA	NA
1965	3	10	139.455	35.1365	30	13.89	34.65	NA	NA	NA	NA	NA	NA	NA
1965	3	10	139.455	35.1365	50	13.86	34.65	NA	NA	NA	NA	NA	NA	NA
1965	3	12	139.547	35.1365	0	14	34.65	NA	NA	NA	NA	NA	NA	NA
1965	3	12	139.547	35.1365	10	14	34.72	NA	NA	NA	NA	NA	NA	NA
1965	3	12	139.547	35.1365	20	14.1	34.66	NA	NA	NA	NA	NA	NA	NA
1965	3	12	139.547	35.1365	30	13.86	34.65	NA	NA	NA	NA	NA	NA	NA
1965	3	12	139.547	35.1365	50	13.82	34.65	NA	NA	NA	NA	NA	NA	NA
1965	3	13	139.605	35.1123	0	13.2	34.38	NA	NA	NA	NA	NA	NA	NA
1965	3	13	139.605	35.1123	10	13.5	34.42	NA	NA	NA	NA	NA	NA	NA
1965	3	13	139.605	35.1123	20	13.4	34.42	NA	NA	NA	NA	NA	NA	NA
1965	3	13	139.605	35.1123	30	13.42	34.43	NA	NA	NA	NA	NA	NA	NA
1965	3	13	139.605	35.1123	50	13.46	34.45	NA	NA	NA	NA	NA	NA	NA
1965	3	14	139.65	35.0545	0	13.6	34.54	NA	NA	NA	NA	NA	NA	NA
1965	3	14	139.65	35.0545	10	13.7	34.54	NA	NA	NA	NA	NA	NA	NA
1965	3	14	139.65	35.0545	20	13.8	34.54	NA	NA	NA	NA	NA	NA	NA
1965	3	14	139.65	35.0545	30	13.42	34.56	NA	NA	NA	NA	NA	NA	NA
1965	3	14	139.65	35.0545	50	13.58	34.61	NA	NA	NA	NA	NA	NA	NA
1965	3	15	139.685	35.013	0	14.3	34.65	NA	NA	NA	NA	NA	NA	NA
1965	3	15	139.685	35.013	10	14.1	34.65	NA	NA	NA	NA	NA	NA	NA
1965	3	15	139.685	35.013	20	14.2	34.65	NA	NA	NA	NA	NA	NA	NA
1965	3	15	139.685	35.013	30	13.77	34.65	NA	NA	NA	NA	NA	NA	NA
1965	3	15	139.685	35.013	50	13.71	34.65	NA	NA	NA	NA	NA	NA	NA
1965	3	17	139.505	35.0548	0	14.1	34.65	NA	NA	NA	NA	NA	NA	NA
1965	3	18	139.439	35.0132	0	14.2	34.65	NA	NA	NA	NA	NA	NA	NA
1965	3	19	139.374	34.9737	0	14.1	34.65	NA	NA	NA	NA	NA	NA	NA
1965	3	19	139.374	34.9737	10	14.1	34.7	NA	NA	NA	NA	NA	NA	NA
1965	3	19	139.374	34.9737	20	14.2	34.68	NA	NA	NA	NA	NA	NA	NA
1965	3	19	139.374	34.9737	30	13.95	34.68	NA	NA	NA	NA	NA	NA	NA
1965	3	19	139.374	34.9737	50	13.85	34.65	NA	NA	NA	NA	NA	NA	NA
1965	3	19	139.374	34.9737	100	13.84	34.65	NA	NA	NA	NA	NA	NA	NA
1965	3	19	139.374	34.9737	150	13.78	34.65	NA	NA	NA	NA	NA	NA	NA
1965	3	19	139.374	34.9737	200	12.08	34.46	NA	NA	NA	NA	NA	NA	NA
1965	3	2	139.455	35.25	0	13.6	34.61	NA	NA	NA	NA	NA	NA	NA
1965	3	22	139.467	34.8248	0	14.3	34.63	NA	NA	NA	NA	NA	NA	NA
1965	3	29	139.754	35.0757	0	14.9	34.59	NA	NA	NA	NA	NA	NA	NA
1965	3	29	139.754	35.0757	10	14.9	34.6	NA	NA	NA	NA	NA	NA	NA
1965	3	29	139.754	35.0757	20	14.9	34.6	NA	NA	NA	NA	NA	NA	NA
1965	3	29	139.754	35.0757	30	14.64	34.6	NA	NA	NA	NA	NA	NA	NA
1965	3	29	139.754	35.0757	50	14.59	34.6	NA	NA	NA	NA	NA	NA	NA
1965	3	29	139.754	35.0757	75	14.5	34.58	NA	NA	NA	NA	NA	NA	NA
1965	3	29	139.754	35.0757	150	13.7	34.47	NA	NA	NA	NA	NA	NA	NA
1965	3	29	139.754	35.0757	200	12.89	34.56	NA	NA	NA	NA	NA	NA	NA
1965	3	3	139.364	35.2467	10	13.9	34.63	NA	NA	NA	NA	NA	NA	NA
1965	3	3	139.364	35.2467	20	14	34.65	NA	NA	NA	NA	NA	NA	NA
1965	3	3	139.364	35.2467	30	13.73	34.65	NA	NA	NA	NA	NA	NA	NA
1965	3	3	139.364	35.2467	50	13.53	34.63	NA	NA	NA	NA	NA	NA	NA
1965	3	3	139.364	35.2467	75	13.42	34.61	NA	NA	NA	NA	NA	NA	NA
1965	3	3	139.364	35.2467	100	13.35	34.61	NA	NA	NA	NA	NA	NA	NA
1965	3	3	139.364	35.2467	150	12.9	34.45	NA	NA	NA	NA	NA	NA	NA
1965	3	3	139.364	35.2467	200	10.94	34.37	NA	NA	NA	NA	NA	NA	NA
1965	3	5	139.181	35.2398	0	13.6	34.39	NA	NA	NA	NA	NA	NA	NA
1965	3	5	139.181	35.2398	10	13.8	34.51	NA	NA	NA	NA	NA	NA	NA
1965	3	5	139.181	35.2398	20	13.8	34.57	NA	NA	NA	NA	NA	NA	NA
1965	3	5	139.181	35.2398	30	13.7	34.59	NA	NA	NA	NA	NA	NA	NA
1965	3	5	139.181	35.2398	50	13.65	34.57	NA	NA	NA	NA	NA	NA	NA
1965	3	5	139.181	35.2398	75	13.6	34.57	NA	NA	NA	NA	NA	NA	NA
1965	3	5	139.181	35.2398	100	12.83	34.61	NA	NA	NA	NA	NA	NA	NA
1965	3	6	139.189	35.1398	0	13.9	34.66	NA	NA	NA	NA	NA	NA	NA
1965	3	6	139.189	35.1398	10	14	34.6	NA	NA	NA	NA	NA	NA	NA
1965	3	6	139.189	35.1398	20	14.1	34.66	NA	NA	NA	NA	NA	NA	NA
1965	3	6	139.189	35.1398	30	13.71	34.65	NA	NA	NA	NA	NA	NA	NA
1965	3	6	139.189	35.1398	50	13.68	34.65	NA	NA	NA	NA	NA	NA	NA
1965	3	6	139.189	35.1398	75	13.56	34.63	NA	NA	NA	NA	NA	NA	NA
1965	3	9	139.371	35.1362	0	14.1	34.65	NA	NA	NA	NA	NA	NA	NA
1965	3	9	139.371	35.1362	10	14.3	34.65	NA	NA	NA	NA	NA	NA	NA
1965	3	9	139.371	35.1362	20	14.3	34.65	NA	NA	NA	NA	NA	NA	NA
1965	3	9	139.371	35.1362	30	13.97	34.65	NA	NA	NA	NA	NA	NA	NA
1965	3	9	139.371	35.1362	50	13.91	34.65	NA	NA	NA	NA	NA	NA	NA
1965	3	9	139.371	35.1362	75	13.91	34.65	NA	NA	NA	NA	NA	NA	NA
1965	3	9	139.371	35.1362	100	13.92	34.65	NA	NA	NA	NA	NA	NA	NA
1965	3	9	139.371	35.1362	150	13.54	34.61	NA	NA	NA	NA	NA	NA	NA
1965	3	9	139.371	35.1362	200	11.82	34.45	NA	NA	NA	NA	NA	NA	NA
1965	4	1	139.547	35.253	0	12.6	34.38	NA	NA	NA	NA	NA	NA	NA
1965	4	1	139.547	35.253	10	13.1	34.38	NA	NA	NA	NA	NA	NA	NA
1965	4	1	139.547	35.253	20	12.94	34.38	NA	NA	NA	NA	NA	NA	NA
1965	4	1	139.547	35.253	30	12.7	34.42	NA	NA	NA	NA	NA	NA	NA
1965	4	1	139.547	35.253	50	12.7	34.47	NA	NA	NA	NA	NA	NA	NA
1965	4	10	139.455	35.1365	0	11.5	34.69	NA	NA	NA	NA	NA	NA	NA
1965	4	10	139.455	35.1365	10	15.2	34.6	NA	NA	NA	NA	NA	NA	NA
1965	4	10	139.455	35.1365	20	13.5	34.6	NA	NA	NA	NA	NA	NA	NA
1965	4	10	139.455	35.1365	30	13.16	34.6	NA	NA	NA	NA	NA	NA	NA
1965	4	10	139.455	35.1365	50	13.15	34.63	NA	NA	NA	NA	NA	NA	NA
1965	4	12	139.547	35.1365	0	16.8	34.74	NA	NA	NA	NA	NA	NA	NA
1965	4	12	139.547	35.1365	10	15.8	34.7	NA	NA	NA	NA	NA	NA	NA
1965	4	12	139.547	35.1365	20	15.4	34.68	NA	NA	NA	NA	NA	NA	NA
1965	4	12	139.547	35.1365	30	15.19	34.68	NA	NA	NA	NA	NA	NA	NA
1965	4	12	139.547	35.1365	50	14.5	34.65	NA	NA	NA	NA	NA	NA	NA
1965	4	13	139.605	35.1123	0	12.3	34.56	NA	NA	NA	NA	NA	NA	NA
1965	4	13	139.605	35.1123	10	13.2	34.54	NA	NA	NA	NA	NA	NA	NA
1965	4	13	139.605	35.1123	20	13.24	34.58	NA	NA	NA	NA	NA	NA	NA
1965	4	13	139.605	35.1123	30	13.11	34.6	NA	NA	NA	NA	NA	NA	NA
1965	4	13	139.605	35.1123	50	13.04	34.58	NA	NA	NA	NA	NA	NA	NA
1965	4	14	139.65	35.0545	0	14.7	34.56	NA	NA	NA	NA	NA	NA	NA
1965	4	14	139.65	35.0545	10	14.8	34.69	NA	NA	NA	NA	NA	NA	NA
1965	4	14	139.65	35.0545	20	13.8	34.63	NA	NA	NA	NA	NA	NA	NA
1965	4	14	139.65	35.0545	30	13.48	34.61	NA	NA	NA	NA	NA	NA	NA
1965	4	14	139.65	35.0545	50	13.09	34.6	NA	NA	NA	NA	NA	NA	NA
1965	4	15	139.685	35.013	0	15.3	34.7	NA	NA	NA	NA	NA	NA	NA
1965	4	15	139.685	35.013	10	15.3	34.7	NA	NA	NA	NA	NA	NA	NA
1965	4	15	139.685	35.013	20	15.4	34.7	NA	NA	NA	NA	NA	NA	NA
1965	4	15	139.685	35.013	30	14.7	34.69	NA	NA	NA	NA	NA	NA	NA
1965	4	15	139.685	35.013	50	13.97	34.61	NA	NA	NA	NA	NA	NA	NA
1965	4	17	139.505	35.0548	0	16.3	34.74	NA	NA	NA	NA	NA	NA	NA
1965	4	18	139.439	35.0132	0	16.8	34.76	NA	NA	NA	NA	NA	NA	NA
1965	4	19	139.374	34.9737	0	16.8	34.74	NA	NA	NA	NA	NA	NA	NA
1965	4	19	139.374	34.9737	10	15.6	34.68	NA	NA	NA	NA	NA	NA	NA
1965	4	19	139.374	34.9737	20	15.5	34.68	NA	NA	NA	NA	NA	NA	NA
1965	4	19	139.374	34.9737	30	15.1	34.68	NA	NA	NA	NA	NA	NA	NA
1965	4	19	139.374	34.9737	50	14.7	34.66	NA	NA	NA	NA	NA	NA	NA
1965	4	19	139.374	34.9737	100	13.71	34.63	NA	NA	NA	NA	NA	NA	NA
1965	4	19	139.374	34.9737	150	13.1	34.59	NA	NA	NA	NA	NA	NA	NA
1965	4	19	139.374	34.9737	200	12.09	34.5	NA	NA	NA	NA	NA	NA	NA
1965	4	2	139.455	35.25	0	13.3	34.67	NA	NA	NA	NA	NA	NA	NA
1965	4	22	139.467	34.8248	0	15.3	34.67	NA	NA	NA	NA	NA	NA	NA
1965	4	29	139.754	35.0757	0	14.8	34.56	NA	NA	NA	NA	NA	NA	NA
1965	4	29	139.754	35.0757	10	14.5	34.58	NA	NA	NA	NA	NA	NA	NA
1965	4	29	139.754	35.0757	20	14.2	34.61	NA	NA	NA	NA	NA	NA	NA
1965	4	29	139.754	35.0757	30	14	34.61	NA	NA	NA	NA	NA	NA	NA
1965	4	29	139.754	35.0757	50	13.51	34.61	NA	NA	NA	NA	NA	NA	NA
1965	4	29	139.754	35.0757	75	13.34	34.6	NA	NA	NA	NA	NA	NA	NA
1965	4	29	139.754	35.0757	150	12.39	34.56	NA	NA	NA	NA	NA	NA	NA
1965	4	29	139.754	35.0757	200	11.18	34.47	NA	NA	NA	NA	NA	NA	NA
1965	4	3	139.364	35.2467	0	12.6	34.49	NA	NA	NA	NA	NA	NA	NA
1965	4	3	139.364	35.2467	10	13	34.45	NA	NA	NA	NA	NA	NA	NA
1965	4	3	139.364	35.2467	20	13.1	34.41	NA	NA	NA	NA	NA	NA	NA
1965	4	3	139.364	35.2467	30	13.2	34.45	NA	NA	NA	NA	NA	NA	NA
1965	4	3	139.364	35.2467	50	12.95	34.63	NA	NA	NA	NA	NA	NA	NA
1965	4	3	139.364	35.2467	75	12.39	34.59	NA	NA	NA	NA	NA	NA	NA
1965	4	3	139.364	35.2467	100	11.8	34.52	NA	NA	NA	NA	NA	NA	NA
1965	4	3	139.364	35.2467	150	11.44	34.48	NA	NA	NA	NA	NA	NA	NA
1965	4	3	139.364	35.2467	200	11.09	34.43	NA	NA	NA	NA	NA	NA	NA
1965	4	5	139.181	35.2398	0	12.7	34.43	NA	NA	NA	NA	NA	NA	NA
1965	4	5	139.181	35.2398	10	13.2	34.47	NA	NA	NA	NA	NA	NA	NA
1965	4	5	139.181	35.2398	20	13.2	34.51	NA	NA	NA	NA	NA	NA	NA
1965	4	5	139.181	35.2398	30	13.22	34.54	NA	NA	NA	NA	NA	NA	NA
1965	4	5	139.181	35.2398	50	12.99	34.54	NA	NA	NA	NA	NA	NA	NA
1965	4	5	139.181	35.2398	75	13.1	34.59	NA	NA	NA	NA	NA	NA	NA
1965	4	5	139.181	35.2398	100	12.99	34.59	NA	NA	NA	NA	NA	NA	NA
1965	4	5	139.181	35.2398	150	11.83	34.52	NA	NA	NA	NA	NA	NA	NA
1965	4	5	139.181	35.2398	200	11.81	34.43	NA	NA	NA	NA	NA	NA	NA
1965	4	6	139.189	35.1398	0	13.1	34.36	NA	NA	NA	NA	NA	NA	NA
1965	4	6	139.189	35.1398	10	13.3	34.43	NA	NA	NA	NA	NA	NA	NA
1965	4	6	139.189	35.1398	20	13.2	34.52	NA	NA	NA	NA	NA	NA	NA
1965	4	6	139.189	35.1398	30	13.2	34.54	NA	NA	NA	NA	NA	NA	NA
1965	4	6	139.189	35.1398	50	13.21	34.63	NA	NA	NA	NA	NA	NA	NA
1965	4	6	139.189	35.1398	75	13.21	34.65	NA	NA	NA	NA	NA	NA	NA
1965	4	9	139.371	35.1362	0	13.2	34.58	NA	NA	NA	NA	NA	NA	NA
1965	4	9	139.371	35.1362	10	13.5	34.57	NA	NA	NA	NA	NA	NA	NA
1965	4	9	139.371	35.1362	20	13.2	34.59	NA	NA	NA	NA	NA	NA	NA
1965	4	9	139.371	35.1362	30	13.05	34.59	NA	NA	NA	NA	NA	NA	NA
1965	4	9	139.371	35.1362	50	12.8	34.59	NA	NA	NA	NA	NA	NA	NA
1965	4	9	139.371	35.1362	75	12.02	34.56	NA	NA	NA	NA	NA	NA	NA
1965	4	9	139.371	35.1362	100	12.84	34.43	NA	NA	NA	NA	NA	NA	NA
1965	4	9	139.371	35.1362	150	10.26	34.37	NA	NA	NA	NA	NA	NA	NA
1965	5	1	139.547	35.253	0	17.3	34.16	NA	NA	NA	NA	NA	NA	NA
1965	5	1	139.547	35.253	10	17.3	34.2	NA	NA	NA	NA	NA	NA	NA
1965	5	1	139.547	35.253	20	16.7	34.36	NA	NA	NA	NA	NA	NA	NA
1965	5	1	139.547	35.253	30	15.09	34.58	NA	NA	NA	NA	NA	NA	NA
1965	5	1	139.547	35.253	50	13.98	34.58	NA	NA	NA	NA	NA	NA	NA
1965	5	10	139.455	35.1365	0	17.3	33.01	NA	NA	NA	NA	NA	NA	NA
1965	5	10	139.455	35.1365	10	17.2	34.27	NA	NA	NA	NA	NA	NA	NA
1965	5	10	139.455	35.1365	20	17.2	34.25	NA	NA	NA	NA	NA	NA	NA
1965	5	10	139.455	35.1365	30	17.2	34.34	NA	NA	NA	NA	NA	NA	NA
1965	5	10	139.455	35.1365	50	13.62	34.34	NA	NA	NA	NA	NA	NA	NA
1965	5	12	139.547	35.1365	0	15.5	34.57	NA	NA	NA	NA	NA	NA	NA
1965	5	12	139.547	35.1365	10	15.7	33.78	NA	NA	NA	NA	NA	NA	NA
1965	5	12	139.547	35.1365	20	16.2	33.82	NA	NA	NA	NA	NA	NA	NA
1965	5	12	139.547	35.1365	30	16.1	34.45	NA	NA	NA	NA	NA	NA	NA
1965	5	12	139.547	35.1365	50	14.77	34.56	NA	NA	NA	NA	NA	NA	NA
1965	5	13	139.605	35.1123	10	20.6	34.58	NA	NA	NA	NA	NA	NA	NA
1965	5	13	139.605	35.1123	20	19.59	34.51	NA	NA	NA	NA	NA	NA	NA
1965	5	13	139.605	35.1123	30	18.1	34.18	NA	NA	NA	NA	NA	NA	NA
1965	5	14	139.65	35.0545	0	20.5	34.56	NA	NA	NA	NA	NA	NA	NA
1965	5	14	139.65	35.0545	10	20.3	34.54	NA	NA	NA	NA	NA	NA	NA
1965	5	14	139.65	35.0545	20	18.9	34.52	NA	NA	NA	NA	NA	NA	NA
1965	5	14	139.65	35.0545	30	19.21	34.54	NA	NA	NA	NA	NA	NA	NA
1965	5	14	139.65	35.0545	50	17.8	34.52	NA	NA	NA	NA	NA	NA	NA
1965	5	15	139.685	35.013	0	20.9	34.6	NA	NA	NA	NA	NA	NA	NA
1965	5	15	139.685	35.013	10	20.9	34.61	NA	NA	NA	NA	NA	NA	NA
1965	5	15	139.685	35.013	20	20.5	34.6	NA	NA	NA	NA	NA	NA	NA
1965	5	15	139.685	35.013	30	19	34.54	NA	NA	NA	NA	NA	NA	NA
1965	5	15	139.685	35.013	50	15.35	34.58	NA	NA	NA	NA	NA	NA	NA
1965	5	17	139.505	35.0548	0	20.9	34.65	NA	NA	NA	NA	NA	NA	NA
1965	5	18	139.439	35.0132	0	21	34.67	NA	NA	NA	NA	NA	NA	NA
1965	5	19	139.374	34.9737	0	20.4	34.63	NA	NA	NA	NA	NA	NA	NA
1965	5	19	139.374	34.9737	10	20.6	34.63	NA	NA	NA	NA	NA	NA	NA
1965	5	19	139.374	34.9737	20	20.4	34.63	NA	NA	NA	NA	NA	NA	NA
1965	5	19	139.374	34.9737	30	20.02	34.63	NA	NA	NA	NA	NA	NA	NA
1965	5	19	139.374	34.9737	50	16.99	34.54	NA	NA	NA	NA	NA	NA	NA
1965	5	19	139.374	34.9737	100	16.11	34.52	NA	NA	NA	NA	NA	NA	NA
1965	5	19	139.374	34.9737	150	14.26	34.57	NA	NA	NA	NA	NA	NA	NA
1965	5	19	139.374	34.9737	200	12.77	34.57	NA	NA	NA	NA	NA	NA	NA
1965	5	2	139.455	35.25	0	17.4	34.4	NA	NA	NA	NA	NA	NA	NA
1965	5	22	139.467	34.8248	0	21.1	34.7	NA	NA	NA	NA	NA	NA	NA
1965	5	29	139.754	35.0757	0	17.1	33.69	NA	NA	NA	NA	NA	NA	NA
1965	5	29	139.754	35.0757	10	16.2	34.09	NA	NA	NA	NA	NA	NA	NA
1965	5	29	139.754	35.0757	20	16.1	34.45	NA	NA	NA	NA	NA	NA	NA
1965	5	29	139.754	35.0757	30	15.4	34.6	NA	NA	NA	NA	NA	NA	NA
1965	5	29	139.754	35.0757	50	14.08	34.6	NA	NA	NA	NA	NA	NA	NA
1965	5	29	139.754	35.0757	75	12.52	34.52	NA	NA	NA	NA	NA	NA	NA
1965	5	3	139.364	35.2467	0	17.5	34.41	NA	NA	NA	NA	NA	NA	NA
1965	5	3	139.364	35.2467	10	16.8	34.51	NA	NA	NA	NA	NA	NA	NA
1965	5	3	139.364	35.2467	20	17.2	34.45	NA	NA	NA	NA	NA	NA	NA
1965	5	3	139.364	35.2467	30	15.9	34.56	NA	NA	NA	NA	NA	NA	NA
1965	5	3	139.364	35.2467	50	14.92	34.61	NA	NA	NA	NA	NA	NA	NA
1965	5	3	139.364	35.2467	75	13.57	34.58	NA	NA	NA	NA	NA	NA	NA
1965	5	3	139.364	35.2467	100	13.7	34.56	NA	NA	NA	NA	NA	NA	NA
1965	5	3	139.364	35.2467	150	12.31	34.48	NA	NA	NA	NA	NA	NA	NA
1965	5	3	139.364	35.2467	200	10.65	34.4	NA	NA	NA	NA	NA	NA	NA
1965	5	5	139.181	35.2398	0	17.7	34.05	NA	NA	NA	NA	NA	NA	NA
1965	5	5	139.181	35.2398	10	16.9	34.49	NA	NA	NA	NA	NA	NA	NA
1965	5	5	139.181	35.2398	20	17.1	34.41	NA	NA	NA	NA	NA	NA	NA
1965	5	5	139.181	35.2398	30	17	34.41	NA	NA	NA	NA	NA	NA	NA
1965	5	5	139.181	35.2398	50	15.14	34.56	NA	NA	NA	NA	NA	NA	NA
1965	5	5	139.181	35.2398	75	14.17	34.58	NA	NA	NA	NA	NA	NA	NA
1965	5	5	139.181	35.2398	100	13.34	34.56	NA	NA	NA	NA	NA	NA	NA
1965	5	5	139.181	35.2398	150	11.5	34.46	NA	NA	NA	NA	NA	NA	NA
1965	5	5	139.181	35.2398	200	11.51	34.39	NA	NA	NA	NA	NA	NA	NA
1965	5	6	139.189	35.1398	0	17.4	34.46	NA	NA	NA	NA	NA	NA	NA
1965	5	6	139.189	35.1398	10	17.4	34.2	NA	NA	NA	NA	NA	NA	NA
1965	5	6	139.189	35.1398	20	17.2	34.39	NA	NA	NA	NA	NA	NA	NA
1965	5	6	139.189	35.1398	30	16.15	34.52	NA	NA	NA	NA	NA	NA	NA
1965	5	6	139.189	35.1398	50	15.14	34.54	NA	NA	NA	NA	NA	NA	NA
1965	5	6	139.189	35.1398	75	14.31	34.58	NA	NA	NA	NA	NA	NA	NA
1965	5	9	139.371	35.1362	0	17.1	34.45	NA	NA	NA	NA	NA	NA	NA
1965	5	9	139.371	35.1362	10	17.4	34.49	NA	NA	NA	NA	NA	NA	NA
1965	5	9	139.371	35.1362	20	17.3	34.5	NA	NA	NA	NA	NA	NA	NA
1965	5	9	139.371	35.1362	30	17.2	34.5	NA	NA	NA	NA	NA	NA	NA
1965	5	9	139.371	35.1362	50	15.16	34.59	NA	NA	NA	NA	NA	NA	NA
1965	5	9	139.371	35.1362	75	14.22	34.58	NA	NA	NA	NA	NA	NA	NA
1965	5	9	139.371	35.1362	100	13.49	34.56	NA	NA	NA	NA	NA	NA	NA
1965	5	9	139.371	35.1362	150	12.68	34.51	NA	NA	NA	NA	NA	NA	NA
1965	5	9	139.371	35.1362	200	10.71	34.41	NA	NA	NA	NA	NA	NA	NA
1965	6	1	139.547	35.253	0	21.5	33.62	NA	NA	NA	NA	NA	NA	NA
1965	6	1	139.547	35.253	20	20.3	34.78	NA	NA	NA	NA	NA	NA	NA
1965	6	1	139.547	35.253	30	18.45	34.34	NA	NA	NA	NA	NA	NA	NA
1965	6	1	139.547	35.253	50	16.66	34.42	NA	NA	NA	NA	NA	NA	NA
1965	6	10	139.455	35.1365	0	21.8	34.36	NA	NA	NA	NA	NA	NA	NA
1965	6	10	139.455	35.1365	10	21.8	34.36	NA	NA	NA	NA	NA	NA	NA
1965	6	10	139.455	35.1365	20	21.7	34.33	NA	NA	NA	NA	NA	NA	NA
1965	6	10	139.455	35.1365	30	21.6	34.33	NA	NA	NA	NA	NA	NA	NA
1965	6	10	139.455	35.1365	50	14.41	34.56	NA	NA	NA	NA	NA	NA	NA
1965	6	12	139.547	35.1365	0	20.5	32.32	NA	NA	NA	NA	NA	NA	NA
1965	6	12	139.547	35.1365	10	21.8	33.71	NA	NA	NA	NA	NA	NA	NA
1965	6	12	139.547	35.1365	20	21.3	34.12	NA	NA	NA	NA	NA	NA	NA
1965	6	12	139.547	35.1365	30	20.9	33.8	NA	NA	NA	NA	NA	NA	NA
1965	6	12	139.547	35.1365	50	16.36	34.52	NA	NA	NA	NA	NA	NA	NA
1965	6	13	139.605	35.1123	0	20.5	30.86	NA	NA	NA	NA	NA	NA	NA
1965	6	13	139.605	35.1123	10	20.1	33.89	NA	NA	NA	NA	NA	NA	NA
1965	6	13	139.605	35.1123	20	20.64	33.51	NA	NA	NA	NA	NA	NA	NA
1965	6	13	139.605	35.1123	30	21.14	32.99	NA	NA	NA	NA	NA	NA	NA
1965	6	14	139.65	35.0545	0	21.3	34.43	NA	NA	NA	NA	NA	NA	NA
1965	6	14	139.65	35.0545	10	21.7	33.53	NA	NA	NA	NA	NA	NA	NA
1965	6	14	139.65	35.0545	20	21.2	33.64	NA	NA	NA	NA	NA	NA	NA
1965	6	14	139.65	35.0545	30	21.1	33.69	NA	NA	NA	NA	NA	NA	NA
1965	6	14	139.65	35.0545	50	17.7	34.51	NA	NA	NA	NA	NA	NA	NA
1965	6	15	139.685	35.013	0	21.9	33.39	NA	NA	NA	NA	NA	NA	NA
1965	6	15	139.685	35.013	10	21.5	33.98	NA	NA	NA	NA	NA	NA	NA
1965	6	15	139.685	35.013	20	20.7	34.16	NA	NA	NA	NA	NA	NA	NA
1965	6	15	139.685	35.013	30	18.88	34.33	NA	NA	NA	NA	NA	NA	NA
1965	6	15	139.685	35.013	50	15.61	34.51	NA	NA	NA	NA	NA	NA	NA
1965	6	17	139.505	35.0548	0	21.7	33.44	NA	NA	NA	NA	NA	NA	NA
1965	6	18	139.439	35.0132	0	21.6	33.06	NA	NA	NA	NA	NA	NA	NA
1965	6	19	139.374	34.9737	0	21.6	33.31	NA	NA	NA	NA	NA	NA	NA
1965	6	19	139.374	34.9737	10	21.7	33.82	NA	NA	NA	NA	NA	NA	NA
1965	6	19	139.374	34.9737	20	21.7	33.8	NA	NA	NA	NA	NA	NA	NA
1965	6	19	139.374	34.9737	30	19.85	34.27	NA	NA	NA	NA	NA	NA	NA
1965	6	19	139.374	34.9737	50	17.85	34.43	NA	NA	NA	NA	NA	NA	NA
1965	6	19	139.374	34.9737	100	14.58	34.52	NA	NA	NA	NA	NA	NA	NA
1965	6	19	139.374	34.9737	150	11.95	34.41	NA	NA	NA	NA	NA	NA	NA
1965	6	19	139.374	34.9737	200	10.33	34.32	NA	NA	NA	NA	NA	NA	NA
1965	6	2	139.455	35.25	0	21.9	33.5	NA	NA	NA	NA	NA	NA	NA
1965	6	22	139.467	34.8248	0	22.8	34.33	NA	NA	NA	NA	NA	NA	NA
1965	6	29	139.754	35.0757	0	21.9	33.87	NA	NA	NA	NA	NA	NA	NA
1965	6	29	139.754	35.0757	10	20.6	34.18	NA	NA	NA	NA	NA	NA	NA
1965	6	29	139.754	35.0757	20	21.2	34.2	NA	NA	NA	NA	NA	NA	NA
1965	6	29	139.754	35.0757	30	21.2	34.16	NA	NA	NA	NA	NA	NA	NA
1965	6	29	139.754	35.0757	50	18.01	34.31	NA	NA	NA	NA	NA	NA	NA
1965	6	29	139.754	35.0757	75	15.96	34.22	NA	NA	NA	NA	NA	NA	NA
1965	6	29	139.754	35.0757	150	13.32	34.52	NA	NA	NA	NA	NA	NA	NA
1965	6	3	139.364	35.2467	0	21.5	33.24	NA	NA	NA	NA	NA	NA	NA
1965	6	3	139.364	35.2467	10	21.1	33.45	NA	NA	NA	NA	NA	NA	NA
1965	6	3	139.364	35.2467	20	21	33.46	NA	NA	NA	NA	NA	NA	NA
1965	6	3	139.364	35.2467	30	20.5	33.76	NA	NA	NA	NA	NA	NA	NA
1965	6	3	139.364	35.2467	50	18.02	34.4	NA	NA	NA	NA	NA	NA	NA
1965	6	3	139.364	35.2467	75	15.82	34.52	NA	NA	NA	NA	NA	NA	NA
1965	6	3	139.364	35.2467	100	14.4	34.66	NA	NA	NA	NA	NA	NA	NA
1965	6	3	139.364	35.2467	150	13.36	34.48	NA	NA	NA	NA	NA	NA	NA
1965	6	3	139.364	35.2467	200	12.46	34.45	NA	NA	NA	NA	NA	NA	NA
1965	6	5	139.181	35.2398	0	21.9	34	NA	NA	NA	NA	NA	NA	NA
1965	6	5	139.181	35.2398	10	21.5	33.28	NA	NA	NA	NA	NA	NA	NA
1965	6	5	139.181	35.2398	20	21	33.64	NA	NA	NA	NA	NA	NA	NA
1965	6	5	139.181	35.2398	30	20.4	33.78	NA	NA	NA	NA	NA	NA	NA
1965	6	5	139.181	35.2398	50	16.87	34.46	NA	NA	NA	NA	NA	NA	NA
1965	6	5	139.181	35.2398	75	15.95	34.52	NA	NA	NA	NA	NA	NA	NA
1965	6	5	139.181	35.2398	100	14.64	34.52	NA	NA	NA	NA	NA	NA	NA
1965	6	5	139.181	35.2398	150	13.84	34.52	NA	NA	NA	NA	NA	NA	NA
1965	6	6	139.189	35.1398	0	21.6	34.43	NA	NA	NA	NA	NA	NA	NA
1965	6	6	139.189	35.1398	10	21.1	34.5	NA	NA	NA	NA	NA	NA	NA
1965	6	6	139.189	35.1398	20	20.5	33.83	NA	NA	NA	NA	NA	NA	NA
1965	6	6	139.189	35.1398	30	18.04	34.32	NA	NA	NA	NA	NA	NA	NA
1965	6	6	139.189	35.1398	50	16.49	34.46	NA	NA	NA	NA	NA	NA	NA
1965	6	6	139.189	35.1398	75	16.49	34.5	NA	NA	NA	NA	NA	NA	NA
1965	6	9	139.371	35.1362	0	21.6	34.34	NA	NA	NA	NA	NA	NA	NA
1965	6	9	139.371	35.1362	10	21.5	34.32	NA	NA	NA	NA	NA	NA	NA
1965	6	9	139.371	35.1362	20	21.5	34.32	NA	NA	NA	NA	NA	NA	NA
1965	6	9	139.371	35.1362	30	21.4	34.32	NA	NA	NA	NA	NA	NA	NA
1965	6	9	139.371	35.1362	50	18.22	34.43	NA	NA	NA	NA	NA	NA	NA
1965	6	9	139.371	35.1362	75	15.88	34.52	NA	NA	NA	NA	NA	NA	NA
1965	6	9	139.371	35.1362	100	13.98	34.56	NA	NA	NA	NA	NA	NA	NA
1965	6	9	139.371	35.1362	150	12.55	34.5	NA	NA	NA	NA	NA	NA	NA
1965	6	9	139.371	35.1362	200	11.11	34.43	NA	NA	NA	NA	NA	NA	NA
1965	7	1	139.547	35.253	0	21.9	32.77	NA	NA	NA	NA	NA	NA	NA
1965	7	1	139.547	35.253	10	21.2	33.59	NA	NA	NA	NA	NA	NA	NA
1965	7	1	139.547	35.253	20	20.5	33.87	NA	NA	NA	NA	NA	NA	NA
1965	7	1	139.547	35.253	30	17.37	34.25	NA	NA	NA	NA	NA	NA	NA
1965	7	1	139.547	35.253	50	15.67	34.38	NA	NA	NA	NA	NA	NA	NA
1965	7	10	139.455	35.1365	0	23.7	31.99	NA	NA	NA	NA	NA	NA	NA
1965	7	10	139.455	35.1365	10	21.5	33.6	NA	NA	NA	NA	NA	NA	NA
1965	7	10	139.455	35.1365	20	21	33.4	NA	NA	NA	NA	NA	NA	NA
1965	7	10	139.455	35.1365	30	21.5	33.59	NA	NA	NA	NA	NA	NA	NA
1965	7	10	139.455	35.1365	50	16.72	34.43	NA	NA	NA	NA	NA	NA	NA
1965	7	12	139.547	35.1365	0	21.8	32.79	NA	NA	NA	NA	NA	NA	NA
1965	7	12	139.547	35.1365	10	20.7	33.53	NA	NA	NA	NA	NA	NA	NA
1965	7	12	139.547	35.1365	20	20.3	34	NA	NA	NA	NA	NA	NA	NA
1965	7	12	139.547	35.1365	30	17.98	34.3	NA	NA	NA	NA	NA	NA	NA
1965	7	12	139.547	35.1365	50	16.35	34.41	NA	NA	NA	NA	NA	NA	NA
1965	7	13	139.605	35.1123	10	21.9	33.57	NA	NA	NA	NA	NA	NA	NA
1965	7	13	139.605	35.1123	20	20.7	33.87	NA	NA	NA	NA	NA	NA	NA
1965	7	13	139.605	35.1123	30	16.15	34.4	NA	NA	NA	NA	NA	NA	NA
1965	7	14	139.65	35.0545	10	22	31.91	NA	NA	NA	NA	NA	NA	NA
1965	7	14	139.65	35.0545	30	18.64	34.13	NA	NA	NA	NA	NA	NA	NA
1965	7	14	139.65	35.0545	50	16.01	34.4	NA	NA	NA	NA	NA	NA	NA
1965	7	17	139.505	35.0548	0	20.2	34.01	NA	NA	NA	NA	NA	NA	NA
1965	7	18	139.439	35.0132	0	22.3	34.07	NA	NA	NA	NA	NA	NA	NA
1965	7	19	139.374	34.9737	0	21.4	34.03	NA	NA	NA	NA	NA	NA	NA
1965	7	19	139.374	34.9737	10	20.9	33.91	NA	NA	NA	NA	NA	NA	NA
1965	7	19	139.374	34.9737	20	19.7	34	NA	NA	NA	NA	NA	NA	NA
1965	7	19	139.374	34.9737	30	19	34.16	NA	NA	NA	NA	NA	NA	NA
1965	7	19	139.374	34.9737	50	17.9	34.48	NA	NA	NA	NA	NA	NA	NA
1965	7	19	139.374	34.9737	100	13.2	34.41	NA	NA	NA	NA	NA	NA	NA
1965	7	19	139.374	34.9737	150	12.64	34.39	NA	NA	NA	NA	NA	NA	NA
1965	7	19	139.374	34.9737	200	12.09	34.41	NA	NA	NA	NA	NA	NA	NA
1965	7	2	139.455	35.25	0	21.8	33.15	NA	NA	NA	NA	NA	NA	NA
1965	7	22	139.467	34.8248	0	21.3	34.22	NA	NA	NA	NA	NA	NA	NA
1965	7	29	139.754	35.0757	0	22	33.77	NA	NA	NA	NA	NA	NA	NA
1965	7	29	139.754	35.0757	10	21.4	33.72	NA	NA	NA	NA	NA	NA	NA
1965	7	29	139.754	35.0757	20	20.3	33.98	NA	NA	NA	NA	NA	NA	NA
1965	7	29	139.754	35.0757	30	16.1	34.24	NA	NA	NA	NA	NA	NA	NA
1965	7	29	139.754	35.0757	50	14.99	34.33	NA	NA	NA	NA	NA	NA	NA
1965	7	29	139.754	35.0757	75	14.29	34.38	NA	NA	NA	NA	NA	NA	NA
1965	7	29	139.754	35.0757	150	12.34	34.29	NA	NA	NA	NA	NA	NA	NA
1965	7	29	139.754	35.0757	200	11.35	34.27	NA	NA	NA	NA	NA	NA	NA
1965	7	3	139.364	35.2467	0	21.9	32.59	NA	NA	NA	NA	NA	NA	NA
1965	7	3	139.364	35.2467	10	22.2	33.27	NA	NA	NA	NA	NA	NA	NA
1965	7	3	139.364	35.2467	20	21.05	33.6	NA	NA	NA	NA	NA	NA	NA
1965	7	3	139.364	35.2467	30	20.8	33.69	NA	NA	NA	NA	NA	NA	NA
1965	7	3	139.364	35.2467	50	16.09	34.39	NA	NA	NA	NA	NA	NA	NA
1965	7	3	139.364	35.2467	75	14.77	34.42	NA	NA	NA	NA	NA	NA	NA
1965	7	3	139.364	35.2467	100	13.46	34.37	NA	NA	NA	NA	NA	NA	NA
1965	7	3	139.364	35.2467	200	11	34.3	NA	NA	NA	NA	NA	NA	NA
1965	7	5	139.181	35.2398	0	22.8	31.5	NA	NA	NA	NA	NA	NA	NA
1965	7	5	139.181	35.2398	10	20.5	33.57	NA	NA	NA	NA	NA	NA	NA
1965	7	5	139.181	35.2398	20	21.3	33.49	NA	NA	NA	NA	NA	NA	NA
1965	7	5	139.181	35.2398	30	18.6	33.13	NA	NA	NA	NA	NA	NA	NA
1965	7	5	139.181	35.2398	50	15.95	34.36	NA	NA	NA	NA	NA	NA	NA
1965	7	6	139.189	35.1398	0	22.4	32.17	NA	NA	NA	NA	NA	NA	NA
1965	7	6	139.189	35.1398	10	20.9	33.67	NA	NA	NA	NA	NA	NA	NA
1965	7	6	139.189	35.1398	20	20	33.87	NA	NA	NA	NA	NA	NA	NA
1965	7	6	139.189	35.1398	30	18.01	34.81	NA	NA	NA	NA	NA	NA	NA
1965	7	6	139.189	35.1398	50	16.29	34.36	NA	NA	NA	NA	NA	NA	NA
1965	7	6	139.189	35.1398	75	14.81	34.4	NA	NA	NA	NA	NA	NA	NA
1965	7	9	139.371	35.1362	0	22.3	33.39	NA	NA	NA	NA	NA	NA	NA
1965	7	9	139.371	35.1362	10	22.4	33.38	NA	NA	NA	NA	NA	NA	NA
1965	7	9	139.371	35.1362	20	20.8	33.83	NA	NA	NA	NA	NA	NA	NA
1965	7	9	139.371	35.1362	30	20.2	34.02	NA	NA	NA	NA	NA	NA	NA
1965	7	9	139.371	35.1362	75	13.49	34.38	NA	NA	NA	NA	NA	NA	NA
1965	7	9	139.371	35.1362	100	12.24	34.32	NA	NA	NA	NA	NA	NA	NA
1965	7	9	139.371	35.1362	150	11.81	34.36	NA	NA	NA	NA	NA	NA	NA
1965	7	9	139.371	35.1362	200	11.84	34.27	NA	NA	NA	NA	NA	NA	NA
1965	8	1	139.547	35.253	0	25	33.51	NA	NA	NA	NA	NA	NA	NA
1965	8	1	139.547	35.253	10	22.4	33.64	NA	NA	NA	NA	NA	NA	NA
1965	8	1	139.547	35.253	20	20.8	33.01	NA	NA	NA	NA	NA	NA	NA
1965	8	1	139.547	35.253	30	18.8	34.27	NA	NA	NA	NA	NA	NA	NA
1965	8	1	139.547	35.253	50	16.74	34.56	NA	NA	NA	NA	NA	NA	NA
1965	8	10	139.455	35.1365	0	26	33.75	NA	NA	NA	NA	NA	NA	NA
1965	8	10	139.455	35.1365	10	22	33.77	NA	NA	NA	NA	NA	NA	NA
1965	8	10	139.455	35.1365	20	19.7	34.15	NA	NA	NA	NA	NA	NA	NA
1965	8	10	139.455	35.1365	30	20.7	34.04	NA	NA	NA	NA	NA	NA	NA
1965	8	10	139.455	35.1365	50	17.28	34.54	NA	NA	NA	NA	NA	NA	NA
1965	8	12	139.547	35.1365	0	24.7	34.92	NA	NA	NA	NA	NA	NA	NA
1965	8	12	139.547	35.1365	10	23.4	34.07	NA	NA	NA	NA	NA	NA	NA
1965	8	12	139.547	35.1365	20	23.1	34.26	NA	NA	NA	NA	NA	NA	NA
1965	8	12	139.547	35.1365	30	21.8	34.66	NA	NA	NA	NA	NA	NA	NA
1965	8	12	139.547	35.1365	50	17.59	34.48	NA	NA	NA	NA	NA	NA	NA
1965	8	13	139.605	35.1123	0	23.5	32.38	NA	NA	NA	NA	NA	NA	NA
1965	8	13	139.605	35.1123	10	21.4	33.73	NA	NA	NA	NA	NA	NA	NA
1965	8	13	139.605	35.1123	20	20.6	34.27	NA	NA	NA	NA	NA	NA	NA
1965	8	13	139.605	35.1123	30	19.02	34.38	NA	NA	NA	NA	NA	NA	NA
1965	8	14	139.65	35.0545	0	26.3	33.86	NA	NA	NA	NA	NA	NA	NA
1965	8	14	139.65	35.0545	10	22.4	34.05	NA	NA	NA	NA	NA	NA	NA
1965	8	14	139.65	35.0545	20	20.3	34.33	NA	NA	NA	NA	NA	NA	NA
1965	8	14	139.65	35.0545	30	17.86	34.47	NA	NA	NA	NA	NA	NA	NA
1965	8	14	139.65	35.0545	50	16.03	34.54	NA	NA	NA	NA	NA	NA	NA
1965	8	15	139.685	35.013	0	25.5	33.65	NA	NA	NA	NA	NA	NA	NA
1965	8	15	139.685	35.013	10	23.4	34.05	NA	NA	NA	NA	NA	NA	NA
1965	8	15	139.685	35.013	20	20.2	34.18	NA	NA	NA	NA	NA	NA	NA
1965	8	15	139.685	35.013	30	18.9	34.31	NA	NA	NA	NA	NA	NA	NA
1965	8	15	139.685	35.013	50	16.73	34.56	NA	NA	NA	NA	NA	NA	NA
1965	8	17	139.505	35.0548	0	25.3	33.95	NA	NA	NA	NA	NA	NA	NA
1965	8	18	139.439	35.0132	0	25.3	33.46	NA	NA	NA	NA	NA	NA	NA
1965	8	19	139.374	34.9737	0	25.5	34.18	NA	NA	NA	NA	NA	NA	NA
1965	8	19	139.374	34.9737	10	18.8	34.46	NA	NA	NA	NA	NA	NA	NA
1965	8	19	139.374	34.9737	20	17.5	34.4	NA	NA	NA	NA	NA	NA	NA
1965	8	19	139.374	34.9737	30	16.8	34.48	NA	NA	NA	NA	NA	NA	NA
1965	8	19	139.374	34.9737	50	15.37	34.5	NA	NA	NA	NA	NA	NA	NA
1965	8	19	139.374	34.9737	100	14.24	34.52	NA	NA	NA	NA	NA	NA	NA
1965	8	19	139.374	34.9737	150	12.56	34.45	NA	NA	NA	NA	NA	NA	NA
1965	8	19	139.374	34.9737	200	11.82	34.41	NA	NA	NA	NA	NA	NA	NA
1965	8	2	139.455	35.25	0	25.8	33.13	NA	NA	NA	NA	NA	NA	NA
1965	8	22	139.467	34.8248	0	25.3	34.28	NA	NA	NA	NA	NA	NA	NA
1965	8	29	139.754	35.0757	20	18.9	34.18	NA	NA	NA	NA	NA	NA	NA
1965	8	29	139.754	35.0757	30	20.3	34.34	NA	NA	NA	NA	NA	NA	NA
1965	8	29	139.754	35.0757	50	16.08	34.56	NA	NA	NA	NA	NA	NA	NA
1965	8	29	139.754	35.0757	75	15.06	34.54	NA	NA	NA	NA	NA	NA	NA
1965	8	29	139.754	35.0757	150	12.19	34.43	NA	NA	NA	NA	NA	NA	NA
1965	8	29	139.754	35.0757	200	11.42	34.42	NA	NA	NA	NA	NA	NA	NA
1965	8	3	139.364	35.2467	0	25.6	33.77	NA	NA	NA	NA	NA	NA	NA
1965	8	3	139.364	35.2467	10	21.1	34.15	NA	NA	NA	NA	NA	NA	NA
1965	8	3	139.364	35.2467	20	18.8	34.79	NA	NA	NA	NA	NA	NA	NA
1965	8	3	139.364	35.2467	30	18.1	34.49	NA	NA	NA	NA	NA	NA	NA
1965	8	3	139.364	35.2467	50	16.44	34	NA	NA	NA	NA	NA	NA	NA
1965	8	3	139.364	35.2467	75	15.05	34.5	NA	NA	NA	NA	NA	NA	NA
1965	8	3	139.364	35.2467	100	14.45	34.52	NA	NA	NA	NA	NA	NA	NA
1965	8	3	139.364	35.2467	150	12.23	34.46	NA	NA	NA	NA	NA	NA	NA
1965	8	3	139.364	35.2467	200	10.78	34.36	NA	NA	NA	NA	NA	NA	NA
1965	8	5	139.181	35.2398	0	26.5	32.59	NA	NA	NA	NA	NA	NA	NA
1965	8	5	139.181	35.2398	10	22.5	33.44	NA	NA	NA	NA	NA	NA	NA
1965	8	5	139.181	35.2398	20	22.9	33.51	NA	NA	NA	NA	NA	NA	NA
1965	8	5	139.181	35.2398	30	19.3	34.31	NA	NA	NA	NA	NA	NA	NA
1965	8	5	139.181	35.2398	50	17.19	34.57	NA	NA	NA	NA	NA	NA	NA
1965	8	5	139.181	35.2398	75	17.01	34.52	NA	NA	NA	NA	NA	NA	NA
1965	8	5	139.181	35.2398	100	14.93	34.52	NA	NA	NA	NA	NA	NA	NA
1965	8	6	139.189	35.1398	0	25.6	33	NA	NA	NA	NA	NA	NA	NA
1965	8	6	139.189	35.1398	10	22	33.41	NA	NA	NA	NA	NA	NA	NA
1965	8	6	139.189	35.1398	20	21.8	33.4	NA	NA	NA	NA	NA	NA	NA
1965	8	6	139.189	35.1398	30	19.5	34.23	NA	NA	NA	NA	NA	NA	NA
1965	8	6	139.189	35.1398	50	16.14	34.57	NA	NA	NA	NA	NA	NA	NA
1965	8	9	139.371	35.1362	0	25	33.75	NA	NA	NA	NA	NA	NA	NA
1965	8	9	139.371	35.1362	10	23.7	33.87	NA	NA	NA	NA	NA	NA	NA
1965	8	9	139.371	35.1362	20	19.5	34.3	NA	NA	NA	NA	NA	NA	NA
1965	8	9	139.371	35.1362	30	18.4	34.43	NA	NA	NA	NA	NA	NA	NA
1965	8	9	139.371	35.1362	50	16.33	34.57	NA	NA	NA	NA	NA	NA	NA
1965	8	9	139.371	35.1362	75	14.95	34.5	NA	NA	NA	NA	NA	NA	NA
1965	8	9	139.371	35.1362	100	14.48	34.54	NA	NA	NA	NA	NA	NA	NA
1965	8	9	139.371	35.1362	150	13.14	34.6	NA	NA	NA	NA	NA	NA	NA
1965	8	9	139.371	35.1362	200	11.58	34.36	NA	NA	NA	NA	NA	NA	NA
1965	9	1	139.547	35.253	0	22.9	32.88	NA	NA	NA	NA	NA	NA	NA
1965	9	1	139.547	35.253	10	22.9	33.35	NA	NA	NA	NA	NA	NA	NA
1965	9	1	139.547	35.253	20	22.8	33.5	NA	NA	NA	NA	NA	NA	NA
1965	9	1	139.547	35.253	30	23	33.68	NA	NA	NA	NA	NA	NA	NA
1965	9	1	139.547	35.253	50	20.01	34.24	NA	NA	NA	NA	NA	NA	NA
1965	9	10	139.455	35.1365	0	22.6	30.95	NA	NA	NA	NA	NA	NA	NA
1965	9	10	139.455	35.1365	10	22.6	33.49	NA	NA	NA	NA	NA	NA	NA
1965	9	10	139.455	35.1365	20	22.4	33.89	NA	NA	NA	NA	NA	NA	NA
1965	9	10	139.455	35.1365	30	22	33.73	NA	NA	NA	NA	NA	NA	NA
1965	9	10	139.455	35.1365	50	19.18	34.25	NA	NA	NA	NA	NA	NA	NA
1965	9	12	139.547	35.1365	0	22.5	30.85	NA	NA	NA	NA	NA	NA	NA
1965	9	12	139.547	35.1365	10	22.4	33.4	NA	NA	NA	NA	NA	NA	NA
1965	9	12	139.547	35.1365	20	22.4	33.76	NA	NA	NA	NA	NA	NA	NA
1965	9	12	139.547	35.1365	50	21.94	33.94	NA	NA	NA	NA	NA	NA	NA
1965	9	13	139.605	35.1123	0	23	33.78	NA	NA	NA	NA	NA	NA	NA
1965	9	13	139.605	35.1123	10	22.7	33.37	NA	NA	NA	NA	NA	NA	NA
1965	9	13	139.605	35.1123	20	22.5	33.82	NA	NA	NA	NA	NA	NA	NA
1965	9	13	139.605	35.1123	30	21.7	34.04	NA	NA	NA	NA	NA	NA	NA
1965	9	13	139.605	35.1123	50	16.68	33.44	NA	NA	NA	NA	NA	NA	NA
1965	9	14	139.65	35.0545	0	22.9	31.61	NA	NA	NA	NA	NA	NA	NA
1965	9	14	139.65	35.0545	10	22.5	33.57	NA	NA	NA	NA	NA	NA	NA
1965	9	14	139.65	35.0545	20	22.3	33.86	NA	NA	NA	NA	NA	NA	NA
1965	9	14	139.65	35.0545	30	22.1	33.69	NA	NA	NA	NA	NA	NA	NA
1965	9	14	139.65	35.0545	50	17.8	34.38	NA	NA	NA	NA	NA	NA	NA
1965	9	15	139.685	35.013	0	23.5	32.62	NA	NA	NA	NA	NA	NA	NA
1965	9	15	139.685	35.013	10	22.8	33.96	NA	NA	NA	NA	NA	NA	NA
1965	9	15	139.685	35.013	20	22.4	33.91	NA	NA	NA	NA	NA	NA	NA
1965	9	15	139.685	35.013	30	22.3	33.71	NA	NA	NA	NA	NA	NA	NA
1965	9	15	139.685	35.013	50	17.62	34.4	NA	NA	NA	NA	NA	NA	NA
1965	9	17	139.505	35.0548	0	23	34.18	NA	NA	NA	NA	NA	NA	NA
1965	9	18	139.439	35.0132	0	22	33.95	NA	NA	NA	NA	NA	NA	NA
1965	9	19	139.374	34.9737	0	21.6	33.96	NA	NA	NA	NA	NA	NA	NA
1965	9	19	139.374	34.9737	10	21.7	33.94	NA	NA	NA	NA	NA	NA	NA
1965	9	19	139.374	34.9737	20	21.57	33.74	NA	NA	NA	NA	NA	NA	NA
1965	9	19	139.374	34.9737	30	21.5	33.94	NA	NA	NA	NA	NA	NA	NA
1965	9	19	139.374	34.9737	50	21.35	33.94	NA	NA	NA	NA	NA	NA	NA
1965	9	19	139.374	34.9737	100	16.5	34.5	NA	NA	NA	NA	NA	NA	NA
1965	9	19	139.374	34.9737	150	14.01	34.52	NA	NA	NA	NA	NA	NA	NA
1965	9	19	139.374	34.9737	200	12.39	34.48	NA	NA	NA	NA	NA	NA	NA
1965	9	2	139.455	35.25	0	22.6	32.57	NA	NA	NA	NA	NA	NA	NA
1965	9	22	139.467	34.8248	0	21.7	33.03	NA	NA	NA	NA	NA	NA	NA
1965	9	29	139.754	35.0757	0	22.7	32.12	NA	NA	NA	NA	NA	NA	NA
1965	9	29	139.754	35.0757	10	22.25	33.68	NA	NA	NA	NA	NA	NA	NA
1965	9	29	139.754	35.0757	20	21.6	34.36	NA	NA	NA	NA	NA	NA	NA
1965	9	29	139.754	35.0757	30	20.08	34.05	NA	NA	NA	NA	NA	NA	NA
1965	9	29	139.754	35.0757	50	17.8	34.34	NA	NA	NA	NA	NA	NA	NA
1965	9	29	139.754	35.0757	75	15.08	34.51	NA	NA	NA	NA	NA	NA	NA
1965	9	29	139.754	35.0757	150	11.3	34.4	NA	NA	NA	NA	NA	NA	NA
1965	9	29	139.754	35.0757	200	10.85	34.63	NA	NA	NA	NA	NA	NA	NA
1965	9	3	139.364	35.2467	0	22.6	32.11	NA	NA	NA	NA	NA	NA	NA
1965	9	3	139.364	35.2467	10	22.5	33.42	NA	NA	NA	NA	NA	NA	NA
1965	9	3	139.364	35.2467	20	22.5	33.64	NA	NA	NA	NA	NA	NA	NA
1965	9	3	139.364	35.2467	30	22	33.78	NA	NA	NA	NA	NA	NA	NA
1965	9	3	139.364	35.2467	50	20.31	34.16	NA	NA	NA	NA	NA	NA	NA
1965	9	3	139.364	35.2467	75	16.2	34.48	NA	NA	NA	NA	NA	NA	NA
1965	9	3	139.364	35.2467	100	14.21	34.5	NA	NA	NA	NA	NA	NA	NA
1965	9	3	139.364	35.2467	150	12.22	34.45	NA	NA	NA	NA	NA	NA	NA
1965	9	5	139.181	35.2398	0	23.1	34.26	NA	NA	NA	NA	NA	NA	NA
1965	9	5	139.181	35.2398	10	22.8	33.26	NA	NA	NA	NA	NA	NA	NA
1965	9	5	139.181	35.2398	20	22.9	33.65	NA	NA	NA	NA	NA	NA	NA
1965	9	5	139.181	35.2398	30	21.69	33	NA	NA	NA	NA	NA	NA	NA
1965	9	5	139.181	35.2398	50	19.92	34.28	NA	NA	NA	NA	NA	NA	NA
1965	9	5	139.181	35.2398	75	17.5	34.45	NA	NA	NA	NA	NA	NA	NA
1965	9	5	139.181	35.2398	100	15.33	34.5	NA	NA	NA	NA	NA	NA	NA
1965	9	5	139.181	35.2398	150	14.09	34.43	NA	NA	NA	NA	NA	NA	NA
1965	9	6	139.189	35.1398	0	23.5	30.8	NA	NA	NA	NA	NA	NA	NA
1965	9	6	139.189	35.1398	10	23.3	32.76	NA	NA	NA	NA	NA	NA	NA
1965	9	6	139.189	35.1398	20	23.1	33.17	NA	NA	NA	NA	NA	NA	NA
1965	9	6	139.189	35.1398	30	21.69	33.98	NA	NA	NA	NA	NA	NA	NA
1965	9	6	139.189	35.1398	50	18.93	34.34	NA	NA	NA	NA	NA	NA	NA
1965	9	6	139.189	35.1398	75	16.53	34.46	NA	NA	NA	NA	NA	NA	NA
1965	9	9	139.371	35.1362	0	22.7	32.16	NA	NA	NA	NA	NA	NA	NA
1965	9	9	139.371	35.1362	10	22.7	32.61	NA	NA	NA	NA	NA	NA	NA
1965	9	9	139.371	35.1362	20	22.64	32.97	NA	NA	NA	NA	NA	NA	NA
1965	9	9	139.371	35.1362	30	22.3	33.42	NA	NA	NA	NA	NA	NA	NA
1965	9	9	139.371	35.1362	50	20.1	34.16	NA	NA	NA	NA	NA	NA	NA
1965	9	9	139.371	35.1362	75	16.75	34.46	NA	NA	NA	NA	NA	NA	NA
1965	9	9	139.371	35.1362	100	15.75	34.49	NA	NA	NA	NA	NA	NA	NA
1965	9	9	139.371	35.1362	150	13.31	34.4	NA	NA	NA	NA	NA	NA	NA
1965	10	1	139.547	35.253	0	19.9	33.82	NA	NA	NA	NA	NA	NA	NA
1965	10	1	139.547	35.253	10	20.3	33.78	NA	NA	NA	NA	NA	NA	NA
1965	10	1	139.547	35.253	20	20.35	33.78	NA	NA	NA	NA	NA	NA	NA
1965	10	1	139.547	35.253	30	19.99	33.78	NA	NA	NA	NA	NA	NA	NA
1965	10	10	139.455	35.1365	0	17.9	34.04	NA	NA	NA	NA	NA	NA	NA
1965	10	10	139.455	35.1365	10	20.25	34	NA	NA	NA	NA	NA	NA	NA
1965	10	10	139.455	35.1365	20	20.2	34	NA	NA	NA	NA	NA	NA	NA
1965	10	10	139.455	35.1365	30	20.2	34	NA	NA	NA	NA	NA	NA	NA
1965	10	10	139.455	35.1365	50	20.1	34.04	NA	NA	NA	NA	NA	NA	NA
1965	10	12	139.547	35.1365	0	19.5	33.74	NA	NA	NA	NA	NA	NA	NA
1965	10	12	139.547	35.1365	10	19.9	33.74	NA	NA	NA	NA	NA	NA	NA
1965	10	12	139.547	35.1365	20	19.83	33.76	NA	NA	NA	NA	NA	NA	NA
1965	10	12	139.547	35.1365	30	19.7	33.78	NA	NA	NA	NA	NA	NA	NA
1965	10	12	139.547	35.1365	50	19.75	34.12	NA	NA	NA	NA	NA	NA	NA
1965	10	13	139.605	35.1123	0	19	31.62	NA	NA	NA	NA	NA	NA	NA
1965	10	13	139.605	35.1123	10	19.4	33.39	NA	NA	NA	NA	NA	NA	NA
1965	10	13	139.605	35.1123	20	19.2	33.4	NA	NA	NA	NA	NA	NA	NA
1965	10	13	139.605	35.1123	30	19.72	33.66	NA	NA	NA	NA	NA	NA	NA
1965	10	14	139.65	35.0545	0	19.2	33.62	NA	NA	NA	NA	NA	NA	NA
1965	10	14	139.65	35.0545	10	19.7	33.6	NA	NA	NA	NA	NA	NA	NA
1965	10	14	139.65	35.0545	20	19.74	33.66	NA	NA	NA	NA	NA	NA	NA
1965	10	14	139.65	35.0545	30	19.49	33.68	NA	NA	NA	NA	NA	NA	NA
1965	10	14	139.65	35.0545	50	19.75	33.91	NA	NA	NA	NA	NA	NA	NA
1965	10	15	139.685	35.013	0	19.9	34.03	NA	NA	NA	NA	NA	NA	NA
1965	10	15	139.685	35.013	10	20.42	34.02	NA	NA	NA	NA	NA	NA	NA
1965	10	15	139.685	35.013	20	20.1	34.02	NA	NA	NA	NA	NA	NA	NA
1965	10	15	139.685	35.013	30	19.93	34.02	NA	NA	NA	NA	NA	NA	NA
1965	10	15	139.685	35.013	50	19.54	34.02	NA	NA	NA	NA	NA	NA	NA
1965	10	17	139.505	35.0548	0	20.9	34.05	NA	NA	NA	NA	NA	NA	NA
1965	10	18	139.439	35.0132	0	20.6	34.07	NA	NA	NA	NA	NA	NA	NA
1965	10	19	139.374	34.9737	0	20.3	33.92	NA	NA	NA	NA	NA	NA	NA
1965	10	19	139.374	34.9737	10	20.4	33.96	NA	NA	NA	NA	NA	NA	NA
1965	10	19	139.374	34.9737	20	20.2	34	NA	NA	NA	NA	NA	NA	NA
1965	10	19	139.374	34.9737	30	20.1	34	NA	NA	NA	NA	NA	NA	NA
1965	10	19	139.374	34.9737	50	20.04	34.01	NA	NA	NA	NA	NA	NA	NA
1965	10	19	139.374	34.9737	100	17.52	34.28	NA	NA	NA	NA	NA	NA	NA
1965	10	19	139.374	34.9737	150	15.06	34.48	NA	NA	NA	NA	NA	NA	NA
1965	10	19	139.374	34.9737	200	11.76	34.46	NA	NA	NA	NA	NA	NA	NA
1965	10	2	139.455	35.25	0	19.9	22.86	NA	NA	NA	NA	NA	NA	NA
1965	10	22	139.467	34.8248	0	21.2	34.09	NA	NA	NA	NA	NA	NA	NA
1965	10	29	139.754	35.0757	0	19.9	33.68	NA	NA	NA	NA	NA	NA	NA
1965	10	29	139.754	35.0757	10	19.9	33.66	NA	NA	NA	NA	NA	NA	NA
1965	10	29	139.754	35.0757	20	19.9	33.78	NA	NA	NA	NA	NA	NA	NA
1965	10	29	139.754	35.0757	30	20.1	33.91	NA	NA	NA	NA	NA	NA	NA
1965	10	29	139.754	35.0757	50	19.81	33.96	NA	NA	NA	NA	NA	NA	NA
1965	10	29	139.754	35.0757	75	18.26	34.15	NA	NA	NA	NA	NA	NA	NA
1965	10	29	139.754	35.0757	150	14.63	34.43	NA	NA	NA	NA	NA	NA	NA
1965	10	3	139.364	35.2467	0	19.9	33.74	NA	NA	NA	NA	NA	NA	NA
1965	10	3	139.364	35.2467	10	20.3	33.73	NA	NA	NA	NA	NA	NA	NA
1965	10	3	139.364	35.2467	20	20.3	33.74	NA	NA	NA	NA	NA	NA	NA
1965	10	3	139.364	35.2467	30	20.25	33.76	NA	NA	NA	NA	NA	NA	NA
1965	10	3	139.364	35.2467	50	20.1	33.82	NA	NA	NA	NA	NA	NA	NA
1965	10	3	139.364	35.2467	75	19.4	34.07	NA	NA	NA	NA	NA	NA	NA
1965	10	3	139.364	35.2467	100	17.45	34.25	NA	NA	NA	NA	NA	NA	NA
1965	10	3	139.364	35.2467	150	14.06	34.43	NA	NA	NA	NA	NA	NA	NA
1965	10	5	139.181	35.2398	0	20.1	33.89	NA	NA	NA	NA	NA	NA	NA
1965	10	5	139.181	35.2398	10	20.4	33.87	NA	NA	NA	NA	NA	NA	NA
1965	10	5	139.181	35.2398	20	20.4	33.85	NA	NA	NA	NA	NA	NA	NA
1965	10	5	139.181	35.2398	30	20.35	33.92	NA	NA	NA	NA	NA	NA	NA
1965	10	5	139.181	35.2398	50	20.2	34.09	NA	NA	NA	NA	NA	NA	NA
1965	10	5	139.181	35.2398	75	18.9	33.92	NA	NA	NA	NA	NA	NA	NA
1965	10	5	139.181	35.2398	100	17.15	34.32	NA	NA	NA	NA	NA	NA	NA
1965	10	5	139.181	35.2398	150	13.37	34.46	NA	NA	NA	NA	NA	NA	NA
1965	10	6	139.189	35.1398	0	20.1	33.87	NA	NA	NA	NA	NA	NA	NA
1965	10	6	139.189	35.1398	10	20.46	33.83	NA	NA	NA	NA	NA	NA	NA
1965	10	6	139.189	35.1398	20	20.5	33.83	NA	NA	NA	NA	NA	NA	NA
1965	10	6	139.189	35.1398	30	20.24	33.83	NA	NA	NA	NA	NA	NA	NA
1965	10	6	139.189	35.1398	50	20.28	33.87	NA	NA	NA	NA	NA	NA	NA
1965	10	9	139.371	35.1362	0	20.1	33.98	NA	NA	NA	NA	NA	NA	NA
1965	10	9	139.371	35.1362	10	20.3	33.45	NA	NA	NA	NA	NA	NA	NA
1965	10	9	139.371	35.1362	20	20.35	33.94	NA	NA	NA	NA	NA	NA	NA
1965	10	9	139.371	35.1362	30	20.4	33.94	NA	NA	NA	NA	NA	NA	NA
1965	10	9	139.371	35.1362	50	20.1	34.07	NA	NA	NA	NA	NA	NA	NA
1965	10	9	139.371	35.1362	75	19.62	34.09	NA	NA	NA	NA	NA	NA	NA
1965	10	9	139.371	35.1362	100	17.28	34.28	NA	NA	NA	NA	NA	NA	NA
1965	10	9	139.371	35.1362	150	12.28	34.49	NA	NA	NA	NA	NA	NA	NA
1965	11	1	139.547	35.253	0	19.1	34.16	NA	NA	NA	NA	NA	NA	NA
1965	11	1	139.547	35.253	10	19.6	34.16	NA	NA	NA	NA	NA	NA	NA
1965	11	1	139.547	35.253	20	20.2	34.15	NA	NA	NA	NA	NA	NA	NA
1965	11	10	139.455	35.1365	0	15	34.2	NA	NA	NA	NA	NA	NA	NA
1965	11	10	139.455	35.1365	10	20.75	34.24	NA	NA	NA	NA	NA	NA	NA
1965	11	10	139.455	35.1365	20	20.8	34.2	NA	NA	NA	NA	NA	NA	NA
1965	11	10	139.455	35.1365	30	20.7	34.22	NA	NA	NA	NA	NA	NA	NA
1965	11	10	139.455	35.1365	50	20.56	34.22	NA	NA	NA	NA	NA	NA	NA
1965	11	12	139.547	35.1365	0	19.9	34.12	NA	NA	NA	NA	NA	NA	NA
1965	11	12	139.547	35.1365	10	20.32	34.07	NA	NA	NA	NA	NA	NA	NA
1965	11	12	139.547	35.1365	20	20.57	34.07	NA	NA	NA	NA	NA	NA	NA
1965	11	12	139.547	35.1365	30	20.45	34.07	NA	NA	NA	NA	NA	NA	NA
1965	11	12	139.547	35.1365	50	20.27	34.13	NA	NA	NA	NA	NA	NA	NA
1965	11	13	139.605	35.1123	0	21	33.96	NA	NA	NA	NA	NA	NA	NA
1965	11	13	139.605	35.1123	10	20.5	33.01	NA	NA	NA	NA	NA	NA	NA
1965	11	13	139.605	35.1123	20	20.33	33.98	NA	NA	NA	NA	NA	NA	NA
1965	11	13	139.605	35.1123	30	20.78	34.2	NA	NA	NA	NA	NA	NA	NA
1965	11	13	139.605	35.1123	50	20.4	34.13	NA	NA	NA	NA	NA	NA	NA
1965	11	14	139.65	35.0545	0	21.2	34.32	NA	NA	NA	NA	NA	NA	NA
1965	11	14	139.65	35.0545	10	21.2	34.34	NA	NA	NA	NA	NA	NA	NA
1965	11	14	139.65	35.0545	20	21.3	34.34	NA	NA	NA	NA	NA	NA	NA
1965	11	14	139.65	35.0545	30	21.13	34.34	NA	NA	NA	NA	NA	NA	NA
1965	11	14	139.65	35.0545	50	20.46	34.31	NA	NA	NA	NA	NA	NA	NA
1965	11	15	139.685	35.013	0	21.1	34.36	NA	NA	NA	NA	NA	NA	NA
1965	11	15	139.685	35.013	10	21.2	34.25	NA	NA	NA	NA	NA	NA	NA
1965	11	15	139.685	35.013	20	20.81	34.2	NA	NA	NA	NA	NA	NA	NA
1965	11	15	139.685	35.013	30	20.44	34.2	NA	NA	NA	NA	NA	NA	NA
1965	11	15	139.685	35.013	50	20.88	34.33	NA	NA	NA	NA	NA	NA	NA
1965	11	17	139.505	35.0548	0	19.7	34.41	NA	NA	NA	NA	NA	NA	NA
1965	11	18	139.439	35.0132	0	18.9	34.4	NA	NA	NA	NA	NA	NA	NA
1965	11	19	139.374	34.9737	0	19.6	34.25	NA	NA	NA	NA	NA	NA	NA
1965	11	19	139.374	34.9737	10	20.33	34.23	NA	NA	NA	NA	NA	NA	NA
1965	11	19	139.374	34.9737	20	20.5	34.24	NA	NA	NA	NA	NA	NA	NA
1965	11	19	139.374	34.9737	30	20.29	34.27	NA	NA	NA	NA	NA	NA	NA
1965	11	19	139.374	34.9737	50	19.73	34.36	NA	NA	NA	NA	NA	NA	NA
1965	11	19	139.374	34.9737	100	17.8	34.49	NA	NA	NA	NA	NA	NA	NA
1965	11	19	139.374	34.9737	150	15.05	34.57	NA	NA	NA	NA	NA	NA	NA
1965	11	2	139.455	35.25	0	19.9	34.2	NA	NA	NA	NA	NA	NA	NA
1965	11	22	139.467	34.8248	0	20.4	34.42	NA	NA	NA	NA	NA	NA	NA
1965	11	29	139.754	35.0757	0	19.9	34.36	NA	NA	NA	NA	NA	NA	NA
1965	11	29	139.754	35.0757	10	21.3	34.34	NA	NA	NA	NA	NA	NA	NA
1965	11	29	139.754	35.0757	20	21.48	34.34	NA	NA	NA	NA	NA	NA	NA
1965	11	29	139.754	35.0757	30	21.95	34.36	NA	NA	NA	NA	NA	NA	NA
1965	11	29	139.754	35.0757	50	20.55	34.38	NA	NA	NA	NA	NA	NA	NA
1965	11	29	139.754	35.0757	75	17.73	34.4	NA	NA	NA	NA	NA	NA	NA
1965	11	3	139.364	35.2467	0	19.6	34.19	NA	NA	NA	NA	NA	NA	NA
1965	11	3	139.364	35.2467	10	20.4	34.18	NA	NA	NA	NA	NA	NA	NA
1965	11	3	139.364	35.2467	20	20.5	34.18	NA	NA	NA	NA	NA	NA	NA
1965	11	3	139.364	35.2467	30	20.4	34.15	NA	NA	NA	NA	NA	NA	NA
1965	11	3	139.364	35.2467	50	19.4	34.4	NA	NA	NA	NA	NA	NA	NA
1965	11	3	139.364	35.2467	75	17.44	34.49	NA	NA	NA	NA	NA	NA	NA
1965	11	3	139.364	35.2467	100	16.37	34.51	NA	NA	NA	NA	NA	NA	NA
1965	11	3	139.364	35.2467	150	13.91	34.51	NA	NA	NA	NA	NA	NA	NA
1965	11	3	139.364	35.2467	200	12.53	34.43	NA	NA	NA	NA	NA	NA	NA
1965	11	5	139.181	35.2398	0	20.1	33.17	NA	NA	NA	NA	NA	NA	NA
1965	11	5	139.181	35.2398	10	20.9	33.11	NA	NA	NA	NA	NA	NA	NA
1965	11	5	139.181	35.2398	20	20.7	34.02	NA	NA	NA	NA	NA	NA	NA
1965	11	5	139.181	35.2398	30	20.6	34.05	NA	NA	NA	NA	NA	NA	NA
1965	11	5	139.181	35.2398	50	20.58	34.13	NA	NA	NA	NA	NA	NA	NA
1965	11	5	139.181	35.2398	75	19.31	34.34	NA	NA	NA	NA	NA	NA	NA
1965	11	5	139.181	35.2398	100	16.99	34.32	NA	NA	NA	NA	NA	NA	NA
1965	11	5	139.181	35.2398	150	14.66	34.51	NA	NA	NA	NA	NA	NA	NA
1965	11	5	139.181	35.2398	200	12.19	34.43	NA	NA	NA	NA	NA	NA	NA
1965	11	6	139.189	35.1398	0	19.5	32.79	NA	NA	NA	NA	NA	NA	NA
1965	11	6	139.189	35.1398	10	20.6	33.72	NA	NA	NA	NA	NA	NA	NA
1965	11	6	139.189	35.1398	20	20.7	33.96	NA	NA	NA	NA	NA	NA	NA
1965	11	6	139.189	35.1398	30	20.54	32.99	NA	NA	NA	NA	NA	NA	NA
1965	11	6	139.189	35.1398	50	19.93	34.15	NA	NA	NA	NA	NA	NA	NA
1965	11	6	139.189	35.1398	75	19.05	34.29	NA	NA	NA	NA	NA	NA	NA
1965	11	9	139.371	35.1362	0	20.1	34.27	NA	NA	NA	NA	NA	NA	NA
1965	11	9	139.371	35.1362	10	20.43	34.24	NA	NA	NA	NA	NA	NA	NA
1965	11	9	139.371	35.1362	20	20.63	34.24	NA	NA	NA	NA	NA	NA	NA
1965	11	9	139.371	35.1362	30	20.8	34.24	NA	NA	NA	NA	NA	NA	NA
1965	11	9	139.371	35.1362	50	20.65	34.25	NA	NA	NA	NA	NA	NA	NA
1965	11	9	139.371	35.1362	75	18.2	34.51	NA	NA	NA	NA	NA	NA	NA
1965	11	9	139.371	35.1362	100	15.4	34.56	NA	NA	NA	NA	NA	NA	NA
1965	11	9	139.371	35.1362	150	12.85	34.49	NA	NA	NA	NA	NA	NA	NA
1965	12	1	139.547	35.253	0	16.1	34.26	NA	NA	NA	NA	NA	NA	NA
1965	12	1	139.547	35.253	10	16.67	34.25	NA	NA	NA	NA	NA	NA	NA
1965	12	1	139.547	35.253	20	16.65	34.27	NA	NA	NA	NA	NA	NA	NA
1965	12	1	139.547	35.253	30	16.62	34.29	NA	NA	NA	NA	NA	NA	NA
1965	12	1	139.547	35.253	50	16.56	34.29	NA	NA	NA	NA	NA	NA	NA
1965	12	10	139.455	35.1365	0	9.4	34.42	NA	NA	NA	NA	NA	NA	NA
1965	12	10	139.455	35.1365	10	17	34.4	NA	NA	NA	NA	NA	NA	NA
1965	12	10	139.455	35.1365	20	17	34.4	NA	NA	NA	NA	NA	NA	NA
1965	12	10	139.455	35.1365	30	16.99	34.4	NA	NA	NA	NA	NA	NA	NA
1965	12	10	139.455	35.1365	50	16.78	34.4	NA	NA	NA	NA	NA	NA	NA
1965	12	12	139.547	35.1365	0	15.5	34.12	NA	NA	NA	NA	NA	NA	NA
1965	12	12	139.547	35.1365	10	16	34.09	NA	NA	NA	NA	NA	NA	NA
1965	12	12	139.547	35.1365	20	16.01	34.11	NA	NA	NA	NA	NA	NA	NA
1965	12	12	139.547	35.1365	30	16.1	34.11	NA	NA	NA	NA	NA	NA	NA
1965	12	12	139.547	35.1365	50	16.05	34.13	NA	NA	NA	NA	NA	NA	NA
1965	12	13	139.605	35.1123	0	14.8	33.86	NA	NA	NA	NA	NA	NA	NA
1965	12	13	139.605	35.1123	10	15.1	33.91	NA	NA	NA	NA	NA	NA	NA
1965	12	13	139.605	35.1123	20	15.2	34.31	NA	NA	NA	NA	NA	NA	NA
1965	12	13	139.605	35.1123	30	16.01	34.38	NA	NA	NA	NA	NA	NA	NA
1965	12	14	139.65	35.0545	0	15.7	34.34	NA	NA	NA	NA	NA	NA	NA
1965	12	14	139.65	35.0545	10	16.3	34.33	NA	NA	NA	NA	NA	NA	NA
1965	12	14	139.65	35.0545	20	16.3	34.33	NA	NA	NA	NA	NA	NA	NA
1965	12	14	139.65	35.0545	30	16.14	34.33	NA	NA	NA	NA	NA	NA	NA
1965	12	14	139.65	35.0545	50	15.93	34.42	NA	NA	NA	NA	NA	NA	NA
1965	12	15	139.685	35.013	0	16.1	34.39	NA	NA	NA	NA	NA	NA	NA
1965	12	15	139.685	35.013	10	16.4	34.34	NA	NA	NA	NA	NA	NA	NA
1965	12	15	139.685	35.013	20	16.2	34.33	NA	NA	NA	NA	NA	NA	NA
1965	12	15	139.685	35.013	30	15.6	34.31	NA	NA	NA	NA	NA	NA	NA
1965	12	15	139.685	35.013	50	16.16	34.31	NA	NA	NA	NA	NA	NA	NA
1965	12	17	139.505	35.0548	0	16.6	34.39	NA	NA	NA	NA	NA	NA	NA
1965	12	18	139.439	35.0132	0	16.3	34.36	NA	NA	NA	NA	NA	NA	NA
1965	12	19	139.374	34.9737	0	16.3	34.38	NA	NA	NA	NA	NA	NA	NA
1965	12	19	139.374	34.9737	10	16.5	34.31	NA	NA	NA	NA	NA	NA	NA
1965	12	19	139.374	34.9737	20	15.8	34.38	NA	NA	NA	NA	NA	NA	NA
1965	12	19	139.374	34.9737	30	16.88	34.38	NA	NA	NA	NA	NA	NA	NA
1965	12	19	139.374	34.9737	50	16.82	34.38	NA	NA	NA	NA	NA	NA	NA
1965	12	19	139.374	34.9737	100	14.33	34.38	NA	NA	NA	NA	NA	NA	NA
1965	12	19	139.374	34.9737	150	13.21	34.34	NA	NA	NA	NA	NA	NA	NA
1965	12	19	139.374	34.9737	200	12.32	34.31	NA	NA	NA	NA	NA	NA	NA
1965	12	2	139.455	35.25	0	16.1	34.33	NA	NA	NA	NA	NA	NA	NA
1965	12	22	139.467	34.8248	0	15.3	34.47	NA	NA	NA	NA	NA	NA	NA
1965	12	29	139.754	35.0757	0	15.3	34.11	NA	NA	NA	NA	NA	NA	NA
1965	12	29	139.754	35.0757	10	15.5	34.11	NA	NA	NA	NA	NA	NA	NA
1965	12	29	139.754	35.0757	20	16.4	34.34	NA	NA	NA	NA	NA	NA	NA
1965	12	29	139.754	35.0757	30	16.4	34.36	NA	NA	NA	NA	NA	NA	NA
1965	12	29	139.754	35.0757	50	16.38	34.38	NA	NA	NA	NA	NA	NA	NA
1965	12	29	139.754	35.0757	75	16.33	34.38	NA	NA	NA	NA	NA	NA	NA
1965	12	3	139.364	35.2467	0	16.3	34.41	NA	NA	NA	NA	NA	NA	NA
1965	12	3	139.364	35.2467	10	16.82	34.37	NA	NA	NA	NA	NA	NA	NA
1965	12	3	139.364	35.2467	20	16.88	34.38	NA	NA	NA	NA	NA	NA	NA
1965	12	3	139.364	35.2467	30	16.78	34.38	NA	NA	NA	NA	NA	NA	NA
1965	12	3	139.364	35.2467	50	16.45	34.42	NA	NA	NA	NA	NA	NA	NA
1965	12	3	139.364	35.2467	75	15.67	34.43	NA	NA	NA	NA	NA	NA	NA
1965	12	3	139.364	35.2467	100	15.04	34.43	NA	NA	NA	NA	NA	NA	NA
1965	12	3	139.364	35.2467	150	13.64	34.43	NA	NA	NA	NA	NA	NA	NA
1965	12	3	139.364	35.2467	200	11.25	34.47	NA	NA	NA	NA	NA	NA	NA
1965	12	5	139.181	35.2398	0	16.7	34.34	NA	NA	NA	NA	NA	NA	NA
1965	12	5	139.181	35.2398	10	17	34.34	NA	NA	NA	NA	NA	NA	NA
1965	12	5	139.181	35.2398	20	16.91	34.36	NA	NA	NA	NA	NA	NA	NA
1965	12	5	139.181	35.2398	30	16.87	34.36	NA	NA	NA	NA	NA	NA	NA
1965	12	5	139.181	35.2398	50	16.6	34.36	NA	NA	NA	NA	NA	NA	NA
1965	12	5	139.181	35.2398	75	14.74	34.43	NA	NA	NA	NA	NA	NA	NA
1965	12	5	139.181	35.2398	100	14.25	34.42	NA	NA	NA	NA	NA	NA	NA
1965	12	5	139.181	35.2398	150	12.73	34.34	NA	NA	NA	NA	NA	NA	NA
1965	12	5	139.181	35.2398	200	11.36	34.27	NA	NA	NA	NA	NA	NA	NA
1965	12	6	139.189	35.1398	0	16.5	33.82	NA	NA	NA	NA	NA	NA	NA
1965	12	6	139.189	35.1398	10	17	34.15	NA	NA	NA	NA	NA	NA	NA
1965	12	6	139.189	35.1398	20	17.19	34.38	NA	NA	NA	NA	NA	NA	NA
1965	12	6	139.189	35.1398	30	16.97	34.4	NA	NA	NA	NA	NA	NA	NA
1965	12	6	139.189	35.1398	50	16.76	34.4	NA	NA	NA	NA	NA	NA	NA
1965	12	6	139.189	35.1398	75	16.44	34.42	NA	NA	NA	NA	NA	NA	NA
1965	12	9	139.371	35.1362	0	17.1	34.42	NA	NA	NA	NA	NA	NA	NA
1965	12	9	139.371	35.1362	10	17.1	34.4	NA	NA	NA	NA	NA	NA	NA
1965	12	9	139.371	35.1362	20	17.1	34.4	NA	NA	NA	NA	NA	NA	NA
1965	12	9	139.371	35.1362	30	17.2	34.4	NA	NA	NA	NA	NA	NA	NA
1965	12	9	139.371	35.1362	50	17	34.4	NA	NA	NA	NA	NA	NA	NA
1965	12	9	139.371	35.1362	75	16.97	34.4	NA	NA	NA	NA	NA	NA	NA
1965	12	9	139.371	35.1362	100	15.4	34.43	NA	NA	NA	NA	NA	NA	NA
1965	12	9	139.371	35.1362	150	16	34.28	NA	NA	NA	NA	NA	NA	NA
1965	12	9	139.371	35.1362	200	11.61	34.27	NA	NA	NA	NA	NA	NA	NA
1966	1	1	139.547	35.253	0	15.9	34.67	NA	NA	NA	NA	NA	4	19
1966	1	1	139.547	35.253	10	16.34	34.65	NA	NA	NA	NA	NA	4	19
1966	1	1	139.547	35.253	20	16.39	34.65	NA	NA	NA	NA	NA	4	19
1966	1	1	139.547	35.253	30	16.28	34.63	NA	NA	NA	NA	NA	4	19
1966	1	10	139.455	35.1365	0	16.5	34.7	NA	NA	NA	NA	NA	4	23
1966	1	10	139.455	35.1365	10	16.8	34.7	NA	NA	NA	NA	NA	4	23
1966	1	10	139.455	35.1365	20	16.4	34.7	NA	NA	NA	NA	NA	4	23
1966	1	10	139.455	35.1365	30	16.95	34.69	NA	NA	NA	NA	NA	4	23
1966	1	10	139.455	35.1365	50	16.01	34.61	NA	NA	NA	NA	NA	4	23
1966	1	10	139.455	35.1365	75	15.63	34.63	NA	NA	NA	NA	NA	4	23
1966	1	10	139.455	35.1365	100	14.9	34.6	NA	NA	NA	NA	NA	4	23
1966	1	10	139.455	35.1365	150	14.56	34.56	NA	NA	NA	NA	NA	4	23
1966	1	10	139.455	35.1365	0	17	34.7	NA	NA	NA	NA	NA	4	23
1966	1	10	139.455	35.1365	10	16.8	34.7	NA	NA	NA	NA	NA	4	23
1966	1	10	139.455	35.1365	20	16.4	34.7	NA	NA	NA	NA	NA	4	23
1966	1	10	139.455	35.1365	30	16.95	34.69	NA	NA	NA	NA	NA	4	23
1966	1	10	139.455	35.1365	50	16.01	34.61	NA	NA	NA	NA	NA	4	23
1966	1	11	139.487	35.1283	0	16.1	34.69	NA	NA	NA	NA	NA	4	26
1966	1	11	139.487	35.1283	10	16.5	34.69	NA	NA	NA	NA	NA	4	26
1966	1	11	139.487	35.1283	20	16.1	34.69	NA	NA	NA	NA	NA	4	26
1966	1	11	139.487	35.1283	30	16.1	34.69	NA	NA	NA	NA	NA	4	26
1966	1	11	139.487	35.1283	50	16.63	34.69	NA	NA	NA	NA	NA	4	26
1966	1	11	139.487	35.1283	100	15.63	34.7	NA	NA	NA	NA	NA	4	26
1966	1	11	139.487	35.1283	150	14.33	34.56	NA	NA	NA	NA	NA	4	26
1966	1	112	139.797	35.4543	0	9.2	31.73	NA	NA	NA	NA	NA	NA	NA
1966	1	112	139.797	35.4543	10	9.07	31.89	NA	NA	NA	NA	NA	NA	NA
1966	1	112	139.797	35.4543	20	11.24	33.03	NA	NA	NA	NA	NA	NA	NA
1966	1	112	139.797	35.4543	30	12.26	33.57	NA	NA	NA	NA	NA	NA	NA
1966	1	117	139.738	35.4543	0	9	31.34	NA	NA	NA	NA	NA	NA	NA
1966	1	117	139.738	35.4543	10	9.07	31.69	NA	NA	NA	NA	NA	NA	NA
1966	1	117	139.738	35.4543	20	11.57	33.33	NA	NA	NA	NA	NA	NA	NA
1966	1	118	139.738	35.4118	0	8.9	32.15	NA	NA	NA	NA	NA	NA	NA
1966	1	118	139.738	35.4118	10	9.21	32.23	NA	NA	NA	NA	NA	NA	NA
1966	1	118	139.738	35.4118	20	11.09	33.15	NA	NA	NA	NA	NA	NA	NA
1966	1	12	139.547	35.1365	0	16	34.69	NA	NA	NA	NA	NA	4	23
1966	1	12	139.547	35.1365	10	16.9	34.67	NA	NA	NA	NA	NA	4	23
1966	1	12	139.547	35.1365	20	16.8	34.67	NA	NA	NA	NA	NA	4	23
1966	1	12	139.547	35.1365	30	16.1	34.67	NA	NA	NA	NA	NA	4	23
1966	1	12	139.547	35.1365	50	16.57	34.67	NA	NA	NA	NA	NA	4	23
1966	1	12	139.547	35.1365	75	16.45	34.63	NA	NA	NA	NA	NA	4	23
1966	1	123	139.692	35.3845	0	9.2	32.05	NA	NA	NA	NA	NA	NA	NA
1966	1	123	139.692	35.3845	10	9.18	32.15	NA	NA	NA	NA	NA	NA	NA
1966	1	123	139.692	35.3845	20	9.82	32.48	NA	NA	NA	NA	NA	NA	NA
1966	1	123	139.692	35.3845	30	11.81	33.42	NA	NA	NA	NA	NA	NA	NA
1966	1	129	139.716	35.287	0	10.1	32.53	NA	NA	NA	NA	NA	NA	NA
1966	1	129	139.716	35.287	10	10.17	32.66	NA	NA	NA	NA	NA	NA	NA
1966	1	129	139.716	35.287	20	10.87	32.9	NA	NA	NA	NA	NA	NA	NA
1966	1	129	139.716	35.287	30	11.92	33.26	NA	NA	NA	NA	NA	NA	NA
1966	1	129	139.716	35.287	50	13.69	33.73	NA	NA	NA	NA	NA	NA	NA
1966	1	13	139.605	35.1123	0	16.5	34.63	NA	NA	NA	NA	NA	NA	17
1966	1	13	139.605	35.1123	10	16.6	34.65	NA	NA	NA	NA	NA	NA	17
1966	1	13	139.605	35.1123	20	16.82	34.65	NA	NA	NA	NA	NA	NA	17
1966	1	13	139.605	35.1123	30	16.66	34.65	NA	NA	NA	NA	NA	NA	17
1966	1	13	139.605	35.1123	50	16.31	34.65	NA	NA	NA	NA	NA	NA	17
1966	1	134	139.751	35.2388	0	12.4	33.78	NA	NA	NA	NA	NA	NA	NA
1966	1	14	139.65	35.0545	0	16	34.65	NA	NA	NA	NA	NA	NA	16
1966	1	14	139.65	35.0545	10	16.3	34.65	NA	NA	NA	NA	NA	NA	16
1966	1	14	139.65	35.0545	20	16.62	34.65	NA	NA	NA	NA	NA	NA	16
1966	1	14	139.65	35.0545	30	16.62	34.65	NA	NA	NA	NA	NA	NA	16
1966	1	14	139.65	35.0545	50	16.51	34.65	NA	NA	NA	NA	NA	NA	16
1966	1	14	139.65	35.0545	75	16.34	34.63	NA	NA	NA	NA	NA	NA	16
1966	1	14	139.65	35.0545	100	16.19	34.61	NA	NA	NA	NA	NA	NA	16
1966	1	15	139.685	35.013	0	15.5	34.65	NA	NA	NA	NA	NA	5	16
1966	1	15	139.685	35.013	10	16.1	34.63	NA	NA	NA	NA	NA	5	16
1966	1	15	139.685	35.013	20	16.3	34.63	NA	NA	NA	NA	NA	5	16
1966	1	15	139.685	35.013	30	16.4	34.63	NA	NA	NA	NA	NA	5	16
1966	1	15	139.685	35.013	50	16.36	34.63	NA	NA	NA	NA	NA	5	16
1966	1	15	139.685	35.013	75	15.78	34.63	NA	NA	NA	NA	NA	5	16
1966	1	15	139.685	35.013	100	15.45	NA	NA	NA	NA	NA	NA	5	16
1966	1	15	139.685	35.013	150	15.3	34.58	NA	NA	NA	NA	NA	5	16
1966	1	16	139.566	35.0948	0	15.8	34.63	NA	NA	NA	NA	NA	5	17
1966	1	16	139.566	35.0948	10	16.4	34.63	NA	NA	NA	NA	NA	5	17
1966	1	16	139.566	35.0948	20	16.5	34.63	NA	NA	NA	NA	NA	5	17
1966	1	16	139.566	35.0948	30	16.5	34.63	NA	NA	NA	NA	NA	5	17
1966	1	16	139.566	35.0948	50	16.12	34.61	NA	NA	NA	NA	NA	5	17
1966	1	16	139.566	35.0948	75	15.76	34.63	NA	NA	NA	NA	NA	5	17
1966	1	17	139.505	35.0548	0	15.9	34.63	NA	NA	NA	NA	NA	5	16
1966	1	17	139.505	35.0548	10	16.6	NA	NA	NA	NA	NA	NA	5	16
1966	1	17	139.505	35.0548	20	16.4	34.63	NA	NA	NA	NA	NA	5	16
1966	1	17	139.505	35.0548	30	16.42	34.63	NA	NA	NA	NA	NA	5	16
1966	1	17	139.505	35.0548	50	15.58	34.61	NA	NA	NA	NA	NA	5	16
1966	1	18	139.439	35.0132	0	15.4	34.63	NA	NA	NA	NA	NA	NA	16
1966	1	18	139.439	35.0132	10	16	34.61	NA	NA	NA	NA	NA	NA	16
1966	1	18	139.439	35.0132	20	15.9	34.52	NA	NA	NA	NA	NA	NA	16
1966	1	18	139.439	35.0132	30	15.82	34.61	NA	NA	NA	NA	NA	NA	16
1966	1	18	139.439	35.0132	50	15.75	34.61	NA	NA	NA	NA	NA	NA	16
1966	1	18	139.439	35.0132	75	15.04	34.56	NA	NA	NA	NA	NA	NA	16
1966	1	18	139.439	35.0132	100	14.46	34.56	NA	NA	NA	NA	NA	NA	16
1966	1	18	139.439	35.0132	150	13.48	34.47	NA	NA	NA	NA	NA	NA	16
1966	1	18	139.439	35.0132	200	13.16	34.43	NA	NA	NA	NA	NA	NA	16
1966	1	19	139.374	34.9737	0	15.9	34.63	NA	NA	NA	NA	NA	5	17
1966	1	19	139.374	34.9737	10	16.3	34.61	NA	NA	NA	NA	NA	5	17
1966	1	19	139.374	34.9737	20	15.8	34.61	NA	NA	NA	NA	NA	5	17
1966	1	19	139.374	34.9737	30	15.74	34.57	NA	NA	NA	NA	NA	5	17
1966	1	19	139.374	34.9737	50	15.26	34.56	NA	NA	NA	NA	NA	5	17
1966	1	19	139.374	34.9737	100	14.25	34.48	NA	NA	NA	NA	NA	5	17
1966	1	19	139.374	34.9737	150	12.39	34.61	NA	NA	NA	NA	NA	5	17
1966	1	2	139.455	35.25	0	16.3	34.67	NA	NA	NA	NA	NA	4	15
1966	1	2	139.455	35.25	10	16.8	34.65	NA	NA	NA	NA	NA	4	15
1966	1	2	139.455	35.25	20	16.6	34.65	NA	NA	NA	NA	NA	4	15
1966	1	2	139.455	35.25	30	16.52	34.65	NA	NA	NA	NA	NA	4	15
1966	1	2	139.455	35.25	50	16.1	34.6	NA	NA	NA	NA	NA	4	15
1966	1	2	139.455	35.25	75	16.09	34.63	NA	NA	NA	NA	NA	4	15
1966	1	20	139.41	34.9217	0	15.1	34.61	NA	NA	NA	NA	NA	5	19
1966	1	20	139.41	34.9217	10	15.7	34.61	NA	NA	NA	NA	NA	5	19
1966	1	20	139.41	34.9217	20	15.8	34.61	NA	NA	NA	NA	NA	5	19
1966	1	20	139.41	34.9217	30	15.74	34.6	NA	NA	NA	NA	NA	5	19
1966	1	20	139.41	34.9217	50	15.28	34.54	NA	NA	NA	NA	NA	5	19
1966	1	20	139.41	34.9217	75	14.48	34.47	NA	NA	NA	NA	NA	5	19
1966	1	20	139.41	34.9217	100	14.36	34.47	NA	NA	NA	NA	NA	5	19
1966	1	20	139.41	34.9217	150	14.12	34.45	NA	NA	NA	NA	NA	5	19
1966	1	20	139.41	34.9217	200	13.12	34.43	NA	NA	NA	NA	NA	5	19
1966	1	21	139.44	34.8733	0	14.8	34.54	NA	NA	NA	NA	NA	5	24
1966	1	21	139.44	34.8733	10	14.8	34.52	NA	NA	NA	NA	NA	5	24
1966	1	21	139.44	34.8733	20	14.9	34.52	NA	NA	NA	NA	NA	5	24
1966	1	21	139.44	34.8733	30	14.77	34.51	NA	NA	NA	NA	NA	5	24
1966	1	21	139.44	34.8733	50	14.45	34.49	NA	NA	NA	NA	NA	5	24
1966	1	21	139.44	34.8733	75	14.47	34.49	NA	NA	NA	NA	NA	5	24
1966	1	21	139.44	34.8733	100	14.45	34.49	NA	NA	NA	NA	NA	5	24
1966	1	21	139.44	34.8733	150	14.13	34.47	NA	NA	NA	NA	NA	5	24
1966	1	21	139.44	34.8733	200	12.5	34.43	NA	NA	NA	NA	NA	5	24
1966	1	22	139.467	34.8248	0	15.5	34.63	NA	NA	NA	NA	NA	5	21
1966	1	22	139.467	34.8248	10	15.8	34.61	NA	NA	NA	NA	NA	5	21
1966	1	22	139.467	34.8248	20	15.9	34.61	NA	NA	NA	NA	NA	5	21
1966	1	22	139.467	34.8248	30	15.84	34.6	NA	NA	NA	NA	NA	5	21
1966	1	22	139.467	34.8248	50	15.22	34.58	NA	NA	NA	NA	NA	5	21
1966	1	22	139.467	34.8248	75	14.5	34.58	NA	NA	NA	NA	NA	5	21
1966	1	22	139.467	34.8248	100	13.44	34.6	NA	NA	NA	NA	NA	5	21
1966	1	22	139.467	34.8248	150	14.46	34.65	NA	NA	NA	NA	NA	5	21
1966	1	22	139.467	34.8248	200	13.3	34.45	NA	NA	NA	NA	NA	5	21
1966	1	23	139.534	34.858	0	16	34.61	NA	NA	NA	NA	NA	5	16
1966	1	23	139.534	34.858	10	15.1	34.61	NA	NA	NA	NA	NA	5	16
1966	1	23	139.534	34.858	20	15.3	34.61	NA	NA	NA	NA	NA	5	16
1966	1	23	139.534	34.858	30	16.39	34.61	NA	NA	NA	NA	NA	5	16
1966	1	23	139.534	34.858	50	15.37	34.56	NA	NA	NA	NA	NA	5	16
1966	1	23	139.534	34.858	75	15.1	34.54	NA	NA	NA	NA	NA	5	16
1966	1	23	139.534	34.858	100	15.01	34.54	NA	NA	NA	NA	NA	5	16
1966	1	23	139.534	34.858	150	13.9	34.49	NA	NA	NA	NA	NA	5	16
1966	1	23	139.534	34.858	200	12.62	34.43	NA	NA	NA	NA	NA	5	16
1966	1	24	139.598	34.891	0	15.6	34.61	NA	NA	NA	NA	NA	5	22
1966	1	24	139.598	34.891	10	14.9	34.6	NA	NA	NA	NA	NA	5	22
1966	1	24	139.598	34.891	20	15.1	34.58	NA	NA	NA	NA	NA	5	22
1966	1	24	139.598	34.891	30	16.19	34.6	NA	NA	NA	NA	NA	5	22
1966	1	24	139.598	34.891	50	15.65	34.6	NA	NA	NA	NA	NA	5	22
1966	1	24	139.598	34.891	75	15.12	34.54	NA	NA	NA	NA	NA	5	22
1966	1	24	139.598	34.891	100	14.3	34.51	NA	NA	NA	NA	NA	5	22
1966	1	24	139.598	34.891	150	13.14	34.45	NA	NA	NA	NA	NA	5	22
1966	1	24	139.598	34.891	200	12.52	34.43	NA	NA	NA	NA	NA	5	22
1966	1	25	139.664	34.9222	0	15.2	34.69	NA	NA	NA	NA	NA	5	27
1966	1	25	139.664	34.9222	10	15.6	34.65	NA	NA	NA	NA	NA	5	27
1966	1	25	139.664	34.9222	20	15.8	34.65	NA	NA	NA	NA	NA	5	27
1966	1	25	139.664	34.9222	30	15.8	NA	NA	NA	NA	NA	NA	5	27
1966	1	25	139.664	34.9222	50	15.43	34.63	NA	NA	NA	NA	NA	5	27
1966	1	25	139.664	34.9222	75	15.39	34.63	NA	NA	NA	NA	NA	5	27
1966	1	25	139.664	34.9222	100	15.39	34.63	NA	NA	NA	NA	NA	5	27
1966	1	25	139.664	34.9222	150	14.27	34.58	NA	NA	NA	NA	NA	5	27
1966	1	25	139.664	34.9222	200	13.91	34.52	NA	NA	NA	NA	NA	5	27
1966	1	25	139.664	34.9222	300	10.55	34.41	NA	NA	NA	NA	NA	5	27
1966	1	26	139.722	34.9535	0	17.3	34.67	NA	NA	NA	NA	NA	5	29
1966	1	26	139.722	34.9535	10	17.38	34.67	NA	NA	NA	NA	NA	5	29
1966	1	26	139.722	34.9535	20	17.1	34.67	NA	NA	NA	NA	NA	5	29
1966	1	26	139.722	34.9535	30	17.17	34.65	NA	NA	NA	NA	NA	5	29
1966	1	26	139.722	34.9535	50	17.02	34.65	NA	NA	NA	NA	NA	5	29
1966	1	26	139.722	34.9535	75	15.89	34.63	NA	NA	NA	NA	NA	5	29
1966	1	26	139.722	34.9535	100	15.32	34.6	NA	NA	NA	NA	NA	5	29
1966	1	27	139.704	35.1467	0	16.2	34.72	NA	NA	NA	NA	NA	4	19
1966	1	27	139.704	35.1467	10	16.5	34.72	NA	NA	NA	NA	NA	4	19
1966	1	27	139.704	35.1467	20	16.92	34.7	NA	NA	NA	NA	NA	4	19
1966	1	29	139.754	35.0757	0	15.8	34.6	NA	NA	NA	NA	NA	4	25
1966	1	29	139.754	35.0757	10	15.5	34.58	NA	NA	NA	NA	NA	4	25
1966	1	29	139.754	35.0757	20	16.46	34.6	NA	NA	NA	NA	NA	4	25
1966	1	29	139.754	35.0757	30	16.45	34.58	NA	NA	NA	NA	NA	4	25
1966	1	3	139.364	35.2467	0	16.1	34.63	NA	NA	NA	NA	NA	4	23
1966	1	3	139.364	35.2467	10	16.7	34.63	NA	NA	NA	NA	NA	4	23
1966	1	3	139.364	35.2467	20	16.65	34.63	NA	NA	NA	NA	NA	4	23
1966	1	3	139.364	35.2467	30	16.35	34.63	NA	NA	NA	NA	NA	4	23
1966	1	3	139.364	35.2467	50	16	34.6	NA	NA	NA	NA	NA	4	23
1966	1	3	139.364	35.2467	75	15.94	34.6	NA	NA	NA	NA	NA	4	23
1966	1	3	139.364	35.2467	100	15.6	34.6	NA	NA	NA	NA	NA	4	23
1966	1	30	139.753	35.3067	0	15.9	34.7	NA	NA	NA	NA	NA	4	20
1966	1	30	139.753	35.3067	10	16.7	34.7	NA	NA	NA	NA	NA	4	20
1966	1	30	139.753	35.3067	20	16.73	34.72	NA	NA	NA	NA	NA	4	20
1966	1	30	139.753	35.3067	30	16.72	34.7	NA	NA	NA	NA	NA	4	20
1966	1	30	139.753	35.3067	50	16.82	34.7	NA	NA	NA	NA	NA	4	20
1966	1	30	139.753	35.3067	75	16.5	34.67	NA	NA	NA	NA	NA	4	20
1966	1	31	139.802	35.1517	0	16.1	34.72	NA	NA	NA	NA	NA	4	19
1966	1	31	139.802	35.1517	10	15.8	34.7	NA	NA	NA	NA	NA	4	19
1966	1	31	139.802	35.1517	20	15.9	34.7	NA	NA	NA	NA	NA	4	19
1966	1	31	139.802	35.1517	30	16.74	34.69	NA	NA	NA	NA	NA	4	19
1966	1	31	139.802	35.1517	50	16.72	34.69	NA	NA	NA	NA	NA	4	19
1966	1	31	139.802	35.1517	75	16.72	34.69	NA	NA	NA	NA	NA	4	19
1966	1	32	139.682	35.18	0	15.9	34.7	NA	NA	NA	NA	NA	4	19
1966	1	32	139.682	35.18	10	16.6	34.69	NA	NA	NA	NA	NA	4	19
1966	1	32	139.682	35.18	20	16	34.7	NA	NA	NA	NA	NA	4	19
1966	1	32	139.682	35.18	30	16.45	34.69	NA	NA	NA	NA	NA	4	19
1966	1	32	139.682	35.18	50	16.42	34.69	NA	NA	NA	NA	NA	4	19
1966	1	32	139.682	35.18	75	16.33	34.67	NA	NA	NA	NA	NA	4	19
1966	1	4	139.275	35.2383	0	15.7	34.61	NA	NA	NA	NA	NA	4	18
1966	1	4	139.275	35.2383	10	16.2	34.6	NA	NA	NA	NA	NA	4	18
1966	1	4	139.275	35.2383	20	15.97	34.61	NA	NA	NA	NA	NA	4	18
1966	1	4	139.275	35.2383	30	16.24	34.61	NA	NA	NA	NA	NA	4	18
1966	1	4	139.275	35.2383	50	15.73	34.58	NA	NA	NA	NA	NA	4	18
1966	1	4	139.275	35.2383	75	15.61	34.58	NA	NA	NA	NA	NA	4	18
1966	1	5	139.181	35.2398	0	15.6	34.54	NA	NA	NA	NA	NA	4	21
1966	1	5	139.181	35.2398	10	16	34.56	NA	NA	NA	NA	NA	4	21
1966	1	5	139.181	35.2398	20	15.92	34.56	NA	NA	NA	NA	NA	4	21
1966	1	5	139.181	35.2398	30	15.92	34.58	NA	NA	NA	NA	NA	4	21
1966	1	5	139.181	35.2398	50	15.91	34.6	NA	NA	NA	NA	NA	4	21
1966	1	5	139.181	35.2398	75	15.9	34.58	NA	NA	NA	NA	NA	4	21
1966	1	5	139.181	35.2398	100	15.81	34.58	NA	NA	NA	NA	NA	4	21
1966	1	6	139.189	35.1398	0	15.3	34.58	NA	NA	NA	NA	NA	4	23
1966	1	6	139.189	35.1398	10	15.72	34.58	NA	NA	NA	NA	NA	4	23
1966	1	6	139.189	35.1398	20	15.5	34.58	NA	NA	NA	NA	NA	4	23
1966	1	6	139.189	35.1398	30	15.73	34.58	NA	NA	NA	NA	NA	4	23
1966	1	6	139.189	35.1398	50	15.68	34.56	NA	NA	NA	NA	NA	4	23
1966	1	6	139.189	35.1398	75	15.53	34.56	NA	NA	NA	NA	NA	4	23
1966	1	6	139.189	35.1398	100	15.42	34.56	NA	NA	NA	NA	NA	4	23
1966	1	7	139.272	35.1365	0	15.2	34.67	NA	NA	NA	NA	NA	4	19
1966	1	7	139.272	35.1365	10	15.59	34.67	NA	NA	NA	NA	NA	4	19
1966	1	7	139.272	35.1365	20	15.47	34.67	NA	NA	NA	NA	NA	4	19
1966	1	7	139.272	35.1365	30	15.75	34.67	NA	NA	NA	NA	NA	4	19
1966	1	7	139.272	35.1365	50	15.66	34.67	NA	NA	NA	NA	NA	4	19
1966	1	7	139.272	35.1365	75	15.1	34.67	NA	NA	NA	NA	NA	4	19
1966	1	7	139.272	35.1365	100	15.4	34.61	NA	NA	NA	NA	NA	4	19
1966	1	8	139.303	35.1233	0	15.2	34.67	NA	NA	NA	NA	NA	4	22
1966	1	8	139.303	35.1233	10	15.4	34.67	NA	NA	NA	NA	NA	4	22
1966	1	8	139.303	35.1233	20	15.3	34.65	NA	NA	NA	NA	NA	4	22
1966	1	8	139.303	35.1233	30	14.82	34.65	NA	NA	NA	NA	NA	4	22
1966	1	8	139.303	35.1233	50	15.4	34.63	NA	NA	NA	NA	NA	4	22
1966	1	8	139.303	35.1233	75	15.1	34.65	NA	NA	NA	NA	NA	4	22
1966	1	8	139.303	35.1233	100	14.77	34.6	NA	NA	NA	NA	NA	4	22
1966	1	8	139.303	35.1233	150	14.51	34.56	NA	NA	NA	NA	NA	4	22
1966	1	9	139.371	35.1362	0	15.8	34.69	NA	NA	NA	NA	NA	4	23
1966	1	9	139.371	35.1362	10	16.1	34.67	NA	NA	NA	NA	NA	4	23
1966	1	9	139.371	35.1362	20	15.62	34.67	NA	NA	NA	NA	NA	4	23
1966	1	9	139.371	35.1362	30	15.43	34.65	NA	NA	NA	NA	NA	4	23
1966	1	9	139.371	35.1362	50	14.82	34.6	NA	NA	NA	NA	NA	4	23
1966	1	9	139.371	35.1362	75	14.63	34.56	NA	NA	NA	NA	NA	4	23
1966	1	9	139.371	35.1362	100	14.52	34.56	NA	NA	NA	NA	NA	4	23
1966	2	1	139.547	35.253	0	13.6	34.63	NA	NA	NA	NA	NA	5	12
1966	2	1	139.547	35.253	10	14.1	34.63	NA	NA	NA	NA	NA	5	12
1966	2	1	139.547	35.253	20	14.43	34.63	NA	NA	NA	NA	NA	5	12
1966	2	1	139.547	35.253	30	14.45	34.63	NA	NA	NA	NA	NA	5	12
1966	2	1	139.547	35.253	50	14.41	34.63	NA	NA	NA	NA	NA	5	12
1966	2	10	139.455	35.1365	0	15.6	34.76	NA	NA	NA	NA	NA	4	17
1966	2	10	139.455	35.1365	10	15.8	34.74	NA	NA	NA	NA	NA	4	17
1966	2	10	139.455	35.1365	20	15.8	34.72	NA	NA	NA	NA	NA	4	17
1966	2	10	139.455	35.1365	30	15.7	34.7	NA	NA	NA	NA	NA	4	17
1966	2	10	139.455	35.1365	50	14.67	34.63	NA	NA	NA	NA	NA	4	17
1966	2	10	139.455	35.1365	75	14.32	34.61	NA	NA	NA	NA	NA	4	17
1966	2	10	139.455	35.1365	100	13.61	34.58	NA	NA	NA	NA	NA	4	17
1966	2	10	139.455	35.1365	150	12.31	34.51	NA	NA	NA	NA	NA	4	17
1966	2	10	139.455	35.1365	200	11.31	34.45	NA	NA	NA	NA	NA	4	17
1966	2	10	139.455	35.1365	0	18.9	34.76	NA	NA	NA	NA	NA	4	17
1966	2	10	139.455	35.1365	10	15.8	34.74	NA	NA	NA	NA	NA	4	17
1966	2	10	139.455	35.1365	20	15.8	34.72	NA	NA	NA	NA	NA	4	17
1966	2	10	139.455	35.1365	30	15.7	34.7	NA	NA	NA	NA	NA	4	17
1966	2	10	139.455	35.1365	50	14.67	34.63	NA	NA	NA	NA	NA	4	17
1966	2	11	139.487	35.1283	0	15.4	34.79	NA	NA	NA	NA	NA	4	24
1966	2	11	139.487	35.1283	10	16.4	34.76	NA	NA	NA	NA	NA	4	24
1966	2	11	139.487	35.1283	20	16.4	34.76	NA	NA	NA	NA	NA	4	24
1966	2	11	139.487	35.1283	30	16	34.74	NA	NA	NA	NA	NA	4	24
1966	2	11	139.487	35.1283	50	14.89	34.65	NA	NA	NA	NA	NA	4	24
1966	2	11	139.487	35.1283	75	14.71	34.61	NA	NA	NA	NA	NA	4	24
1966	2	11	139.487	35.1283	100	13.93	34.58	NA	NA	NA	NA	NA	4	24
1966	2	11	139.487	35.1283	150	12.54	34.51	NA	NA	NA	NA	NA	4	24
1966	2	11	139.487	35.1283	200	11.26	34.45	NA	NA	NA	NA	NA	4	24
1966	2	112	139.797	35.4543	0	8.4	32.05	NA	NA	NA	NA	NA	NA	NA
1966	2	112	139.797	35.4543	10	8.12	31.9	NA	NA	NA	NA	NA	NA	NA
1966	2	112	139.797	35.4543	20	8.15	32.05	NA	NA	NA	NA	NA	NA	NA
1966	2	112	139.797	35.4543	30	8.92	32.9	NA	NA	NA	NA	NA	NA	NA
1966	2	117	139.738	35.4543	0	9.1	32.24	NA	NA	NA	NA	NA	NA	NA
1966	2	117	139.738	35.4543	10	8.56	32.21	NA	NA	NA	NA	NA	NA	NA
1966	2	117	139.738	35.4543	20	8.79	32.38	NA	NA	NA	NA	NA	NA	NA
1966	2	118	139.738	35.4118	0	8.6	32.26	NA	NA	NA	NA	NA	NA	NA
1966	2	118	139.738	35.4118	10	9.11	32.46	NA	NA	NA	NA	NA	NA	NA
1966	2	118	139.738	35.4118	20	8.56	32.57	NA	NA	NA	NA	NA	NA	NA
1966	2	12	139.547	35.1365	0	16	34.76	NA	NA	NA	NA	NA	4	20
1966	2	12	139.547	35.1365	10	16.3	34.74	NA	NA	NA	NA	NA	4	20
1966	2	12	139.547	35.1365	20	16.1	34.76	NA	NA	NA	NA	NA	4	20
1966	2	12	139.547	35.1365	30	15.92	34.74	NA	NA	NA	NA	NA	4	20
1966	2	12	139.547	35.1365	50	14.93	34.67	NA	NA	NA	NA	NA	4	20
1966	2	12	139.547	35.1365	75	14.85	34.67	NA	NA	NA	NA	NA	4	20
1966	2	123	139.692	35.3845	0	9.2	32.54	NA	NA	NA	NA	NA	NA	NA
1966	2	123	139.692	35.3845	10	9.11	32.57	NA	NA	NA	NA	NA	NA	NA
1966	2	123	139.692	35.3845	20	9.21	32.76	NA	NA	NA	NA	NA	NA	NA
1966	2	123	139.692	35.3845	30	9.1	32.94	NA	NA	NA	NA	NA	NA	NA
1966	2	124	139.69	35.3358	10	9.52	32.66	NA	NA	NA	NA	NA	NA	NA
1966	2	129	139.716	35.287	0	10.3	32.86	NA	NA	NA	NA	NA	NA	NA
1966	2	129	139.716	35.287	10	9.94	32.95	NA	NA	NA	NA	NA	NA	NA
1966	2	129	139.716	35.287	20	10.24	33.12	NA	NA	NA	NA	NA	NA	NA
1966	2	129	139.716	35.287	30	10.79	33.33	NA	NA	NA	NA	NA	NA	NA
1966	2	129	139.716	35.287	50	11.25	33.62	NA	NA	NA	NA	NA	NA	NA
1966	2	13	139.605	35.1123	0	14.1	34.58	NA	NA	NA	NA	NA	NA	15
1966	2	13	139.605	35.1123	10	14.64	34.6	NA	NA	NA	NA	NA	NA	15
1966	2	13	139.605	35.1123	20	14.63	34.6	NA	NA	NA	NA	NA	NA	15
1966	2	13	139.605	35.1123	30	14.65	34.6	NA	NA	NA	NA	NA	NA	15
1966	2	134	139.751	35.2388	0	12.4	33.63	NA	NA	NA	NA	NA	NA	NA
1966	2	134	139.751	35.2388	10	11.54	33.71	NA	NA	NA	NA	NA	NA	NA
1966	2	134	139.751	35.2388	20	11.63	33.71	NA	NA	NA	NA	NA	NA	NA
1966	2	134	139.751	35.2388	30	11.68	33.69	NA	NA	NA	NA	NA	NA	NA
1966	2	14	139.65	35.0545	0	15.3	NA	NA	NA	NA	NA	NA	5	21
1966	2	14	139.65	35.0545	10	15.3	NA	NA	NA	NA	NA	NA	5	21
1966	2	14	139.65	35.0545	20	15.3	NA	NA	NA	NA	NA	NA	5	21
1966	2	14	139.65	35.0545	30	15.53	34.7	NA	NA	NA	NA	NA	5	21
1966	2	14	139.65	35.0545	50	15.24	34.7	NA	NA	NA	NA	NA	5	21
1966	2	14	139.65	35.0545	75	15.1	34.69	NA	NA	NA	NA	NA	5	21
1966	2	14	139.65	35.0545	100	14.6	34.61	NA	NA	NA	NA	NA	5	21
1966	2	14	139.65	35.0545	150	13.05	34.61	NA	NA	NA	NA	NA	5	21
1966	2	14	139.65	35.0545	200	11.32	34.45	NA	NA	NA	NA	NA	5	21
1966	2	15	139.685	35.013	0	15.8	34.7	NA	NA	NA	NA	NA	5	21
1966	2	15	139.685	35.013	10	15.3	34.7	NA	NA	NA	NA	NA	5	21
1966	2	15	139.685	35.013	20	15.2	34.69	NA	NA	NA	NA	NA	5	21
1966	2	15	139.685	35.013	30	15.94	34.67	NA	NA	NA	NA	NA	5	21
1966	2	15	139.685	35.013	50	15.62	34.65	NA	NA	NA	NA	NA	5	21
1966	2	15	139.685	35.013	75	15.42	34.65	NA	NA	NA	NA	NA	5	21
1966	2	15	139.685	35.013	100	14.7	34.61	NA	NA	NA	NA	NA	5	21
1966	2	15	139.685	35.013	150	13.54	34.54	NA	NA	NA	NA	NA	5	21
1966	2	15	139.685	35.013	200	12.31	34.47	NA	NA	NA	NA	NA	5	21
1966	2	15	139.685	35.013	300	9.35	34.47	NA	NA	NA	NA	NA	5	21
1966	2	16	139.566	35.0948	0	15.6	34.69	NA	NA	NA	NA	NA	5	24
1966	2	16	139.566	35.0948	10	15.2	34.7	NA	NA	NA	NA	NA	5	24
1966	2	16	139.566	35.0948	20	15.2	34.7	NA	NA	NA	NA	NA	5	24
1966	2	16	139.566	35.0948	30	16.31	34.7	NA	NA	NA	NA	NA	5	24
1966	2	16	139.566	35.0948	50	15.87	34.69	NA	NA	NA	NA	NA	5	24
1966	2	16	139.566	35.0948	75	15.4	34.69	NA	NA	NA	NA	NA	5	24
1966	2	16	139.566	35.0948	100	15.21	34.65	NA	NA	NA	NA	NA	5	24
1966	2	16	139.566	35.0948	150	14.01	34.56	NA	NA	NA	NA	NA	5	24
1966	2	17	139.505	35.0548	0	15.9	34.78	NA	NA	NA	NA	NA	5	25
1966	2	17	139.505	35.0548	10	16.25	34.76	NA	NA	NA	NA	NA	5	25
1966	2	17	139.505	35.0548	20	15.06	34.72	NA	NA	NA	NA	NA	5	25
1966	2	17	139.505	35.0548	30	16.34	34.7	NA	NA	NA	NA	NA	5	25
1966	2	17	139.505	35.0548	50	15.82	34.69	NA	NA	NA	NA	NA	5	25
1966	2	17	139.505	35.0548	75	15.3	34.65	NA	NA	NA	NA	NA	5	25
1966	2	17	139.505	35.0548	100	14.6	34.61	NA	NA	NA	NA	NA	5	25
1966	2	18	139.439	35.0132	0	15.8	34.74	NA	NA	NA	NA	NA	5	24
1966	2	18	139.439	35.0132	10	15.9	34.72	NA	NA	NA	NA	NA	5	24
1966	2	18	139.439	35.0132	20	16	34.7	NA	NA	NA	NA	NA	5	24
1966	2	18	139.439	35.0132	30	15.64	34.7	NA	NA	NA	NA	NA	5	24
1966	2	18	139.439	35.0132	50	14.96	34.63	NA	NA	NA	NA	NA	5	24
1966	2	18	139.439	35.0132	75	14.45	34.61	NA	NA	NA	NA	NA	5	24
1966	2	18	139.439	35.0132	100	14.15	34.58	NA	NA	NA	NA	NA	5	24
1966	2	18	139.439	35.0132	150	12.88	34.51	NA	NA	NA	NA	NA	5	24
1966	2	18	139.439	35.0132	200	11.35	34.43	NA	NA	NA	NA	NA	5	24
1966	2	19	139.374	34.9737	0	14.8	34.69	NA	NA	NA	NA	NA	5	17
1966	2	19	139.374	34.9737	10	14.9	34.67	NA	NA	NA	NA	NA	5	17
1966	2	19	139.374	34.9737	20	14.9	34.67	NA	NA	NA	NA	NA	5	17
1966	2	19	139.374	34.9737	30	14.94	34.67	NA	NA	NA	NA	NA	5	17
1966	2	19	139.374	34.9737	50	14.96	34.67	NA	NA	NA	NA	NA	5	17
1966	2	19	139.374	34.9737	75	14.9	34.67	NA	NA	NA	NA	NA	5	17
1966	2	19	139.374	34.9737	100	13.91	34.58	NA	NA	NA	NA	NA	5	17
1966	2	19	139.374	34.9737	150	12.28	34.49	NA	NA	NA	NA	NA	5	17
1966	2	19	139.374	34.9737	200	11.1	34.4	NA	NA	NA	NA	NA	5	17
1966	2	2	139.455	35.25	0	14.1	34.61	NA	NA	NA	NA	NA	6	NA
1966	2	2	139.455	35.25	10	14.4	34.6	NA	NA	NA	NA	NA	6	NA
1966	2	2	139.455	35.25	20	14.5	34.6	NA	NA	NA	NA	NA	6	NA
1966	2	2	139.455	35.25	30	14.56	34.61	NA	NA	NA	NA	NA	6	NA
1966	2	2	139.455	35.25	50	14.55	34.61	NA	NA	NA	NA	NA	6	NA
1966	2	2	139.455	35.25	75	14.57	34.61	NA	NA	NA	NA	NA	6	NA
1966	2	2	139.455	35.25	100	14.56	34.6	NA	NA	NA	NA	NA	6	NA
1966	2	2	139.455	35.25	150	12.66	34.47	NA	NA	NA	NA	NA	6	NA
1966	2	2	139.455	35.25	200	11.49	34.41	NA	NA	NA	NA	NA	6	NA
1966	2	20	139.41	34.9217	0	14.9	34.7	NA	NA	NA	NA	NA	5	17
1966	2	20	139.41	34.9217	10	14.6	34.7	NA	NA	NA	NA	NA	5	17
1966	2	20	139.41	34.9217	20	15.2	34.69	NA	NA	NA	NA	NA	5	17
1966	2	20	139.41	34.9217	30	15.19	34.69	NA	NA	NA	NA	NA	5	17
1966	2	20	139.41	34.9217	50	15.06	34.67	NA	NA	NA	NA	NA	5	17
1966	2	20	139.41	34.9217	75	14.45	34.61	NA	NA	NA	NA	NA	5	17
1966	2	20	139.41	34.9217	100	14.2	34.6	NA	NA	NA	NA	NA	5	17
1966	2	20	139.41	34.9217	150	12.68	34.52	NA	NA	NA	NA	NA	5	17
1966	2	20	139.41	34.9217	200	11.2	34.43	NA	NA	NA	NA	NA	5	17
1966	2	21	139.44	34.8733	0	14.8	34.69	NA	NA	NA	NA	NA	5	17
1966	2	21	139.44	34.8733	10	15.2	34.69	NA	NA	NA	NA	NA	5	17
1966	2	21	139.44	34.8733	20	15.38	34.69	NA	NA	NA	NA	NA	5	17
1966	2	21	139.44	34.8733	30	15.12	NA	NA	NA	NA	NA	NA	5	17
1966	2	21	139.44	34.8733	50	15.15	34.69	NA	NA	NA	NA	NA	5	17
1966	2	21	139.44	34.8733	75	14.13	34.6	NA	NA	NA	NA	NA	5	17
1966	2	21	139.44	34.8733	100	13.64	34.58	NA	NA	NA	NA	NA	5	17
1966	2	21	139.44	34.8733	150	13.24	34.54	NA	NA	NA	NA	NA	5	17
1966	2	21	139.44	34.8733	200	11.78	34.49	NA	NA	NA	NA	NA	5	17
1966	2	22	139.467	34.8248	0	14.8	34.7	NA	NA	NA	NA	NA	5	16
1966	2	22	139.467	34.8248	10	15.2	34.7	NA	NA	NA	NA	NA	5	16
1966	2	22	139.467	34.8248	20	15.1	34.7	NA	NA	NA	NA	NA	5	16
1966	2	22	139.467	34.8248	30	15.05	34.7	NA	NA	NA	NA	NA	5	16
1966	2	22	139.467	34.8248	50	15.01	34.7	NA	NA	NA	NA	NA	5	16
1966	2	22	139.467	34.8248	75	14.95	34.7	NA	NA	NA	NA	NA	5	16
1966	2	22	139.467	34.8248	100	14.93	34.69	NA	NA	NA	NA	NA	5	16
1966	2	22	139.467	34.8248	150	12.97	34.54	NA	NA	NA	NA	NA	5	16
1966	2	22	139.467	34.8248	200	12.2	34.51	NA	NA	NA	NA	NA	5	16
1966	2	22	139.467	34.8248	300	9.89	34.4	NA	NA	NA	NA	NA	5	16
1966	2	23	139.534	34.858	0	14.9	34.7	NA	NA	NA	NA	NA	5	13
1966	2	23	139.534	34.858	10	15	34.69	NA	NA	NA	NA	NA	5	13
1966	2	23	139.534	34.858	20	14.98	34.69	NA	NA	NA	NA	NA	5	13
1966	2	23	139.534	34.858	30	14.96	34.69	NA	NA	NA	NA	NA	5	13
1966	2	23	139.534	34.858	50	14.94	34.69	NA	NA	NA	NA	NA	5	13
1966	2	23	139.534	34.858	75	14.95	34.69	NA	NA	NA	NA	NA	5	13
1966	2	23	139.534	34.858	100	14.8	34.67	NA	NA	NA	NA	NA	5	13
1966	2	23	139.534	34.858	150	13.74	34.58	NA	NA	NA	NA	NA	5	13
1966	2	23	139.534	34.858	200	12.32	34.51	NA	NA	NA	NA	NA	5	13
1966	2	24	139.598	34.891	0	16.3	34.78	NA	NA	NA	NA	NA	5	21
1966	2	24	139.598	34.891	10	16.7	34.76	NA	NA	NA	NA	NA	5	21
1966	2	24	139.598	34.891	20	16.7	34.76	NA	NA	NA	NA	NA	5	21
1966	2	24	139.598	34.891	30	16.7	34.16	NA	NA	NA	NA	NA	5	21
1966	2	24	139.598	34.891	50	16.53	34.76	NA	NA	NA	NA	NA	5	21
1966	2	24	139.598	34.891	75	15.79	34.7	NA	NA	NA	NA	NA	5	21
1966	2	24	139.598	34.891	100	15.26	34.7	NA	NA	NA	NA	NA	5	21
1966	2	24	139.598	34.891	150	14.34	34.61	NA	NA	NA	NA	NA	5	21
1966	2	24	139.598	34.891	200	12.29	34.52	NA	NA	NA	NA	NA	5	21
1966	2	25	139.664	34.9222	0	16.2	34.74	NA	NA	NA	NA	NA	5	23
1966	2	25	139.664	34.9222	10	16.5	34.76	NA	NA	NA	NA	NA	5	23
1966	2	25	139.664	34.9222	20	16.6	34.76	NA	NA	NA	NA	NA	5	23
1966	2	25	139.664	34.9222	30	16.6	34.43	NA	NA	NA	NA	NA	5	23
1966	2	25	139.664	34.9222	50	16.5	34.72	NA	NA	NA	NA	NA	5	23
1966	2	25	139.664	34.9222	75	15.86	34.69	NA	NA	NA	NA	NA	5	23
1966	2	25	139.664	34.9222	100	15.25	34.69	NA	NA	NA	NA	NA	5	23
1966	2	25	139.664	34.9222	150	13.6	34.56	NA	NA	NA	NA	NA	5	23
1966	2	25	139.664	34.9222	200	10.78	34.41	NA	NA	NA	NA	NA	5	23
1966	2	25	139.664	34.9222	300	9.74	34.72	NA	NA	NA	NA	NA	5	23
1966	2	26	139.722	34.9535	0	15.9	34.74	NA	NA	NA	NA	NA	5	28
1966	2	26	139.722	34.9535	10	16.2	34.72	NA	NA	NA	NA	NA	5	28
1966	2	26	139.722	34.9535	20	16.3	34.69	NA	NA	NA	NA	NA	5	28
1966	2	26	139.722	34.9535	30	15.9	34.69	NA	NA	NA	NA	NA	5	28
1966	2	26	139.722	34.9535	50	15.3	34.69	NA	NA	NA	NA	NA	5	28
1966	2	26	139.722	34.9535	75	14.64	34.63	NA	NA	NA	NA	NA	5	28
1966	2	26	139.722	34.9535	100	13.41	34.56	NA	NA	NA	NA	NA	5	28
1966	2	26	139.722	34.9535	150	12.39	34.49	NA	NA	NA	NA	NA	5	28
1966	2	26	139.722	34.9535	200	11.69	34.47	NA	NA	NA	NA	NA	5	28
1966	2	26	139.722	34.9535	300	10.35	34.41	NA	NA	NA	NA	NA	5	28
1966	2	27	139.704	35.1467	0	14.3	34.69	NA	NA	NA	NA	NA	5	16
1966	2	27	139.704	35.1467	10	14.8	34.67	NA	NA	NA	NA	NA	5	16
1966	2	27	139.704	35.1467	20	14.5	34.67	NA	NA	NA	NA	NA	5	16
1966	2	28	139.688	35.0517	0	15.8	34.74	NA	NA	NA	NA	NA	4	24
1966	2	28	139.688	35.0517	10	16	34.23	NA	NA	NA	NA	NA	4	24
1966	2	28	139.688	35.0517	20	16.2	34.72	NA	NA	NA	NA	NA	4	24
1966	2	28	139.688	35.0517	30	15.76	34.7	NA	NA	NA	NA	NA	4	24
1966	2	28	139.688	35.0517	50	15	34.65	NA	NA	NA	NA	NA	4	24
1966	2	28	139.688	35.0517	100	14.56	34.63	NA	NA	NA	NA	NA	4	24
1966	2	29	139.754	35.0757	0	14.1	34.76	NA	NA	NA	NA	NA	4	17
1966	2	29	139.754	35.0757	10	15.5	34.72	NA	NA	NA	NA	NA	4	17
1966	2	29	139.754	35.0757	20	15.1	34.74	NA	NA	NA	NA	NA	4	17
1966	2	3	139.364	35.2467	0	14.2	34.63	NA	NA	NA	NA	NA	5	18
1966	2	3	139.364	35.2467	10	14.6	34.61	NA	NA	NA	NA	NA	5	18
1966	2	3	139.364	35.2467	20	14.5	34.61	NA	NA	NA	NA	NA	5	18
1966	2	3	139.364	35.2467	30	14.61	34.63	NA	NA	NA	NA	NA	5	18
1966	2	3	139.364	35.2467	50	14.6	34.63	NA	NA	NA	NA	NA	5	18
1966	2	3	139.364	35.2467	75	14.62	34.63	NA	NA	NA	NA	NA	5	18
1966	2	3	139.364	35.2467	100	14.64	34.63	NA	NA	NA	NA	NA	5	18
1966	2	3	139.364	35.2467	150	13.11	34.51	NA	NA	NA	NA	NA	5	18
1966	2	3	139.364	35.2467	200	11.32	34.41	NA	NA	NA	NA	NA	5	18
1966	2	30	139.753	35.3067	0	NA	34.72	NA	NA	NA	NA	NA	4	20
1966	2	30	139.753	35.3067	10	15.7	34.72	NA	NA	NA	NA	NA	4	20
1966	2	30	139.753	35.3067	20	15.35	34.74	NA	NA	NA	NA	NA	4	20
1966	2	30	139.753	35.3067	30	15.66	34.72	NA	NA	NA	NA	NA	4	20
1966	2	30	139.753	35.3067	50	15.32	34.69	NA	NA	NA	NA	NA	4	20
1966	2	30	139.753	35.3067	75	14.89	34.65	NA	NA	NA	NA	NA	4	20
1966	2	31	139.802	35.1517	0	14.7	34.72	NA	NA	NA	NA	NA	5	16
1966	2	31	139.802	35.1517	10	15.6	34.7	NA	NA	NA	NA	NA	5	16
1966	2	31	139.802	35.1517	20	15.01	34.7	NA	NA	NA	NA	NA	5	16
1966	2	31	139.802	35.1517	30	15.08	34.69	NA	NA	NA	NA	NA	5	16
1966	2	31	139.802	35.1517	50	14.73	34.65	NA	NA	NA	NA	NA	5	16
1966	2	31	139.802	35.1517	75	14.64	34.65	NA	NA	NA	NA	NA	5	16
1966	2	32	139.682	35.18	0	15.2	34.74	NA	NA	NA	NA	NA	5	15
1966	2	32	139.682	35.18	10	15.5	34.72	NA	NA	NA	NA	NA	5	15
1966	2	32	139.682	35.18	20	14.7	34.72	NA	NA	NA	NA	NA	5	15
1966	2	32	139.682	35.18	30	14.92	34.69	NA	NA	NA	NA	NA	5	15
1966	2	32	139.682	35.18	50	14.66	34.65	NA	NA	NA	NA	NA	5	15
1966	2	32	139.682	35.18	75	14.51	34.61	NA	NA	NA	NA	NA	5	15
1966	2	4	139.275	35.2383	0	14.3	34.63	NA	NA	NA	NA	NA	5	18
1966	2	4	139.275	35.2383	10	14.71	34.63	NA	NA	NA	NA	NA	5	18
1966	2	4	139.275	35.2383	20	14.65	34.63	NA	NA	NA	NA	NA	5	18
1966	2	4	139.275	35.2383	30	14.58	34.63	NA	NA	NA	NA	NA	5	18
1966	2	4	139.275	35.2383	50	14.65	34.63	NA	NA	NA	NA	NA	5	18
1966	2	4	139.275	35.2383	75	14.64	34.63	NA	NA	NA	NA	NA	5	18
1966	2	4	139.275	35.2383	100	14.61	34.63	NA	NA	NA	NA	NA	5	18
1966	2	5	139.181	35.2398	0	14.5	34.6	NA	NA	NA	NA	NA	5	13
1966	2	5	139.181	35.2398	10	14.9	34.6	NA	NA	NA	NA	NA	5	13
1966	2	5	139.181	35.2398	20	14.95	34.61	NA	NA	NA	NA	NA	5	13
1966	2	5	139.181	35.2398	30	14.71	34.63	NA	NA	NA	NA	NA	5	13
1966	2	5	139.181	35.2398	50	14.7	34.63	NA	NA	NA	NA	NA	5	13
1966	2	5	139.181	35.2398	75	14.67	34.63	NA	NA	NA	NA	NA	5	13
1966	2	5	139.181	35.2398	100	14.14	34.58	NA	NA	NA	NA	NA	5	13
1966	2	5	139.181	35.2398	150	12.9	34.51	NA	NA	NA	NA	NA	5	13
1966	2	5	139.181	35.2398	200	11.05	34.41	NA	NA	NA	NA	NA	5	13
1966	2	6	139.189	35.1398	0	14.5	34.61	NA	NA	NA	NA	NA	5	11
1966	2	6	139.189	35.1398	10	14.9	34.63	NA	NA	NA	NA	NA	5	11
1966	2	6	139.189	35.1398	20	14.8	34.63	NA	NA	NA	NA	NA	5	11
1966	2	6	139.189	35.1398	30	14.75	34.63	NA	NA	NA	NA	NA	5	11
1966	2	6	139.189	35.1398	50	14.76	34.63	NA	NA	NA	NA	NA	5	11
1966	2	6	139.189	35.1398	75	14.61	34.63	NA	NA	NA	NA	NA	5	11
1966	2	6	139.189	35.1398	100	14.23	34.58	NA	NA	NA	NA	NA	5	11
1966	2	6	139.189	35.1398	150	12.74	34.49	NA	NA	NA	NA	NA	5	11
1966	2	7	139.272	35.1365	0	14.8	NA	NA	NA	NA	NA	NA	5	18
1966	2	7	139.272	35.1365	10	15.4	34.69	NA	NA	NA	NA	NA	5	18
1966	2	7	139.272	35.1365	20	15.2	34.67	NA	NA	NA	NA	NA	5	18
1966	2	7	139.272	35.1365	30	NA	34.67	NA	NA	NA	NA	NA	5	18
1966	2	7	139.272	35.1365	50	14.95	34.65	NA	NA	NA	NA	NA	5	18
1966	2	7	139.272	35.1365	75	14.55	34.74	NA	NA	NA	NA	NA	5	18
1966	2	7	139.272	35.1365	100	14.15	34.23	NA	NA	NA	NA	NA	5	18
1966	2	7	139.272	35.1365	150	12.88	34.72	NA	NA	NA	NA	NA	5	18
1966	2	7	139.272	35.1365	200	11.35	34.72	NA	NA	NA	NA	NA	5	18
1966	2	8	139.303	35.1233	0	14.9	NA	NA	NA	NA	NA	NA	5	19
1966	2	8	139.303	35.1233	10	15.3	34.65	NA	NA	NA	NA	NA	5	19
1966	2	8	139.303	35.1233	20	15.5	34.65	NA	NA	NA	NA	NA	5	19
1966	2	8	139.303	35.1233	30	15.2	34.61	NA	NA	NA	NA	NA	5	19
1966	2	8	139.303	35.1233	50	15.05	34.76	NA	NA	NA	NA	NA	5	19
1966	2	8	139.303	35.1233	75	14.76	34.74	NA	NA	NA	NA	NA	5	19
1966	2	8	139.303	35.1233	100	14.06	34.76	NA	NA	NA	NA	NA	5	19
1966	2	8	139.303	35.1233	150	12.85	34.74	NA	NA	NA	NA	NA	5	19
1966	2	8	139.303	35.1233	200	11.3	34.67	NA	NA	NA	NA	NA	5	19
1966	2	9	139.371	35.1362	0	15.7	34.72	NA	NA	NA	NA	NA	4	22
1966	2	9	139.371	35.1362	10	15.8	34.72	NA	NA	NA	NA	NA	4	22
1966	2	9	139.371	35.1362	20	15.8	34.72	NA	NA	NA	NA	NA	4	22
1966	2	9	139.371	35.1362	30	15.8	34.69	NA	NA	NA	NA	NA	4	22
1966	2	9	139.371	35.1362	50	14.73	34.65	NA	NA	NA	NA	NA	4	22
1966	2	9	139.371	35.1362	75	14.58	34.65	NA	NA	NA	NA	NA	4	22
1966	2	9	139.371	35.1362	100	13.9	34.58	NA	NA	NA	NA	NA	4	22
1966	2	9	139.371	35.1362	150	12.03	34.51	NA	NA	NA	NA	NA	4	22
1966	3	1	139.547	35.253	0	14.2	34.56	NA	NA	NA	NA	NA	6	9
1966	3	1	139.547	35.253	10	14.6	34.56	NA	NA	NA	NA	NA	6	9
1966	3	1	139.547	35.253	20	15	34.54	NA	NA	NA	NA	NA	6	9
1966	3	1	139.547	35.253	30	15.05	34.54	NA	NA	NA	NA	NA	6	9
1966	3	1	139.547	35.253	50	14.73	34.61	NA	NA	NA	NA	NA	6	9
1966	3	10	139.455	35.1365	0	14.4	34.65	NA	NA	NA	NA	NA	4	16
1966	3	10	139.455	35.1365	10	14.82	34.63	NA	NA	NA	NA	NA	4	16
1966	3	10	139.455	35.1365	20	15.04	34.63	NA	NA	NA	NA	NA	4	16
1966	3	10	139.455	35.1365	30	14.82	34.63	NA	NA	NA	NA	NA	4	16
1966	3	10	139.455	35.1365	50	14.74	34.63	NA	NA	NA	NA	NA	4	16
1966	3	10	139.455	35.1365	75	14.28	34.61	NA	NA	NA	NA	NA	4	16
1966	3	10	139.455	35.1365	100	13.76	34.58	NA	NA	NA	NA	NA	4	16
1966	3	10	139.455	35.1365	150	11.96	34.49	NA	NA	NA	NA	NA	4	16
1966	3	10	139.455	35.1365	0	10.8	34.65	NA	NA	NA	NA	NA	4	16
1966	3	10	139.455	35.1365	10	14.8	34.63	NA	NA	NA	NA	NA	4	16
1966	3	10	139.455	35.1365	20	15.04	34.63	NA	NA	NA	NA	NA	4	16
1966	3	10	139.455	35.1365	30	14.82	34.63	NA	NA	NA	NA	NA	4	16
1966	3	10	139.455	35.1365	50	14.74	34.63	NA	NA	NA	NA	NA	4	16
1966	3	11	139.487	35.1283	0	14.8	34.67	NA	NA	NA	NA	NA	4	17
1966	3	11	139.487	35.1283	10	15.37	34.65	NA	NA	NA	NA	NA	4	17
1966	3	11	139.487	35.1283	20	15.16	34.65	NA	NA	NA	NA	NA	4	17
1966	3	11	139.487	35.1283	30	15.28	34.65	NA	NA	NA	NA	NA	4	17
1966	3	11	139.487	35.1283	50	14.88	34.63	NA	NA	NA	NA	NA	4	17
1966	3	11	139.487	35.1283	75	NA	34.58	NA	NA	NA	NA	NA	4	17
1966	3	11	139.487	35.1283	100	13.08	34.51	NA	NA	NA	NA	NA	4	17
1966	3	11	139.487	35.1283	150	11.81	34.45	NA	NA	NA	NA	NA	4	17
1966	3	112	139.797	35.4543	0	9.4	31.22	NA	NA	NA	NA	NA	NA	NA
1966	3	112	139.797	35.4543	10	9.81	31.83	NA	NA	NA	NA	NA	NA	NA
1966	3	112	139.797	35.4543	20	10.23	32.39	NA	NA	NA	NA	NA	NA	NA
1966	3	112	139.797	35.4543	30	11.66	33.08	NA	NA	NA	NA	NA	NA	NA
1966	3	117	139.738	35.4543	0	9.8	30.28	NA	NA	NA	NA	NA	NA	NA
1966	3	117	139.738	35.4543	10	9.69	31.76	NA	NA	NA	NA	NA	NA	NA
1966	3	117	139.738	35.4543	20	10.26	32.27	NA	NA	NA	NA	NA	NA	NA
1966	3	118	139.738	35.4118	0	9.8	31.97	NA	NA	NA	NA	NA	NA	NA
1966	3	118	139.738	35.4118	10	10.17	32.26	NA	NA	NA	NA	NA	NA	NA
1966	3	118	139.738	35.4118	20	10.54	32.56	NA	NA	NA	NA	NA	NA	NA
1966	3	12	139.547	35.1365	0	15	34.61	NA	NA	NA	NA	NA	5	13
1966	3	12	139.547	35.1365	10	15	34.61	NA	NA	NA	NA	NA	5	13
1966	3	12	139.547	35.1365	20	15.26	34.61	NA	NA	NA	NA	NA	5	13
1966	3	12	139.547	35.1365	30	15.18	34.61	NA	NA	NA	NA	NA	5	13
1966	3	12	139.547	35.1365	50	14.84	34.61	NA	NA	NA	NA	NA	5	13
1966	3	12	139.547	35.1365	75	13.62	34.56	NA	NA	NA	NA	NA	5	13
1966	3	123	139.692	35.3845	0	9.5	31.11	NA	NA	NA	NA	NA	NA	NA
1966	3	123	139.692	35.3845	10	10.46	31.29	NA	NA	NA	NA	NA	NA	NA
1966	3	123	139.692	35.3845	20	11.72	32.54	NA	NA	NA	NA	NA	NA	NA
1966	3	123	139.692	35.3845	30	12.07	33.48	NA	NA	NA	NA	NA	NA	NA
1966	3	124	139.69	35.3358	10	10.61	32.54	NA	NA	NA	NA	NA	NA	NA
1966	3	129	139.716	35.287	0	11.1	32.55	NA	NA	NA	NA	NA	NA	NA
1966	3	129	139.716	35.287	10	10.96	32.95	NA	NA	NA	NA	NA	NA	NA
1966	3	129	139.716	35.287	20	12.15	32.48	NA	NA	NA	NA	NA	NA	NA
1966	3	129	139.716	35.287	30	12.88	33.87	NA	NA	NA	NA	NA	NA	NA
1966	3	129	139.716	35.287	50	13.11	33.96	NA	NA	NA	NA	NA	NA	NA
1966	3	13	139.605	35.1123	0	13.1	34.81	NA	NA	NA	NA	NA	7	11
1966	3	13	139.605	35.1123	10	13.8	34.04	NA	NA	NA	NA	NA	7	11
1966	3	13	139.605	35.1123	20	14	34.2	NA	NA	NA	NA	NA	7	11
1966	3	13	139.605	35.1123	30	14.67	NA	NA	NA	NA	NA	NA	7	11
1966	3	13	139.605	35.1123	50	15.21	34.54	NA	NA	NA	NA	NA	7	11
1966	3	134	139.751	35.2388	0	12.3	33.63	NA	NA	NA	NA	NA	NA	NA
1966	3	134	139.751	35.2388	10	12.81	34.25	NA	NA	NA	NA	NA	NA	NA
1966	3	134	139.751	35.2388	20	11.02	34.07	NA	NA	NA	NA	NA	NA	NA
1966	3	14	139.65	35.0545	0	15.5	34.69	NA	NA	NA	NA	NA	5	21
1966	3	14	139.65	35.0545	10	15.3	34.65	NA	NA	NA	NA	NA	5	21
1966	3	14	139.65	35.0545	20	15.3	34.65	NA	NA	NA	NA	NA	5	21
1966	3	14	139.65	35.0545	30	15.37	34.67	NA	NA	NA	NA	NA	5	21
1966	3	14	139.65	35.0545	50	15.31	34.67	NA	NA	NA	NA	NA	5	21
1966	3	14	139.65	35.0545	75	15.28	34.67	NA	NA	NA	NA	NA	5	21
1966	3	14	139.65	35.0545	100	14.29	34.63	NA	NA	NA	NA	NA	5	21
1966	3	14	139.65	35.0545	150	12.58	34.51	NA	NA	NA	NA	NA	5	21
1966	3	15	139.685	35.013	0	15.9	34.67	NA	NA	NA	NA	NA	5	23
1966	3	15	139.685	35.013	10	15.6	34.65	NA	NA	NA	NA	NA	5	23
1966	3	15	139.685	35.013	20	15.7	34.65	NA	NA	NA	NA	NA	5	23
1966	3	15	139.685	35.013	30	15.34	34.67	NA	NA	NA	NA	NA	5	23
1966	3	15	139.685	35.013	50	15.34	NA	NA	NA	NA	NA	NA	5	23
1966	3	15	139.685	35.013	75	15.32	34.67	NA	NA	NA	NA	NA	5	23
1966	3	15	139.685	35.013	100	14.8	NA	NA	NA	NA	NA	NA	5	23
1966	3	15	139.685	35.013	150	12.94	34.52	NA	NA	NA	NA	NA	5	23
1966	3	15	139.685	35.013	200	11.54	34.45	NA	NA	NA	NA	NA	5	23
1966	3	15	139.685	35.013	300	9.54	34.69	NA	NA	NA	NA	NA	5	23
1966	3	16	139.566	35.0948	0	15.4	34.67	NA	NA	NA	NA	NA	5	23
1966	3	16	139.566	35.0948	10	15.7	34.65	NA	NA	NA	NA	NA	5	23
1966	3	16	139.566	35.0948	20	15.5	34.67	NA	NA	NA	NA	NA	5	23
1966	3	16	139.566	35.0948	30	15.41	34.65	NA	NA	NA	NA	NA	5	23
1966	3	16	139.566	35.0948	50	15.36	34.65	NA	NA	NA	NA	NA	5	23
1966	3	16	139.566	35.0948	75	15.36	34.67	NA	NA	NA	NA	NA	5	23
1966	3	16	139.566	35.0948	100	15.23	34.65	NA	NA	NA	NA	NA	5	23
1966	3	17	139.505	35.0548	0	15.4	34.67	NA	NA	NA	NA	NA	5	21
1966	3	17	139.505	35.0548	10	15.6	34.67	NA	NA	NA	NA	NA	5	21
1966	3	17	139.505	35.0548	20	15.6	34.65	NA	NA	NA	NA	NA	5	21
1966	3	17	139.505	35.0548	30	15.35	34.65	NA	NA	NA	NA	NA	5	21
1966	3	17	139.505	35.0548	50	15.35	34.65	NA	NA	NA	NA	NA	5	21
1966	3	17	139.505	35.0548	75	15.35	34.65	NA	NA	NA	NA	NA	5	21
1966	3	17	139.505	35.0548	100	14.95	NA	NA	NA	NA	NA	NA	5	21
1966	3	17	139.505	35.0548	150	13.89	34.67	NA	NA	NA	NA	NA	5	21
1966	3	18	139.439	35.0132	0	15.3	34.65	NA	NA	NA	NA	NA	5	25
1966	3	18	139.439	35.0132	10	15.6	34.65	NA	NA	NA	NA	NA	5	25
1966	3	18	139.439	35.0132	20	15.6	34.67	NA	NA	NA	NA	NA	5	25
1966	3	18	139.439	35.0132	30	15.27	34.63	NA	NA	NA	NA	NA	5	25
1966	3	18	139.439	35.0132	50	15.28	34.63	NA	NA	NA	NA	NA	5	25
1966	3	18	139.439	35.0132	75	15.29	34.63	NA	NA	NA	NA	NA	5	25
1966	3	18	139.439	35.0132	100	14.8	34.61	NA	NA	NA	NA	NA	5	25
1966	3	18	139.439	35.0132	150	13.88	34.58	NA	NA	NA	NA	NA	5	25
1966	3	18	139.439	35.0132	200	11.97	34.47	NA	NA	NA	NA	NA	5	25
1966	3	19	139.374	34.9737	0	15.3	34.69	NA	NA	NA	NA	NA	5	24
1966	3	19	139.374	34.9737	10	15.6	34.67	NA	NA	NA	NA	NA	5	24
1966	3	19	139.374	34.9737	20	15.7	34.69	NA	NA	NA	NA	NA	5	24
1966	3	19	139.374	34.9737	30	15.4	NA	NA	NA	NA	NA	NA	5	24
1966	3	19	139.374	34.9737	50	15.4	34.7	NA	NA	NA	NA	NA	5	24
1966	3	19	139.374	34.9737	75	15.18	34.65	NA	NA	NA	NA	NA	5	24
1966	3	19	139.374	34.9737	100	14.82	34.65	NA	NA	NA	NA	NA	5	24
1966	3	19	139.374	34.9737	150	13.47	34.56	NA	NA	NA	NA	NA	5	24
1966	3	19	139.374	34.9737	200	11.8	34.47	NA	NA	NA	NA	NA	5	24
1966	3	19	139.374	34.9737	300	9.97	34.41	NA	NA	NA	NA	NA	5	24
1966	3	2	139.455	35.25	0	14.4	34.51	NA	NA	NA	NA	NA	6	11
1966	3	2	139.455	35.25	10	15.2	34.49	NA	NA	NA	NA	NA	6	11
1966	3	2	139.455	35.25	20	15.2	34.51	NA	NA	NA	NA	NA	6	11
1966	3	2	139.455	35.25	30	15.1	34.54	NA	NA	NA	NA	NA	6	11
1966	3	2	139.455	35.25	50	15	34.63	NA	NA	NA	NA	NA	6	11
1966	3	2	139.455	35.25	75	14.85	34.63	NA	NA	NA	NA	NA	6	11
1966	3	20	139.41	34.9217	0	15	34.67	NA	NA	NA	NA	NA	5	24
1966	3	20	139.41	34.9217	10	15.4	34.67	NA	NA	NA	NA	NA	5	24
1966	3	20	139.41	34.9217	20	15.4	34.67	NA	NA	NA	NA	NA	5	24
1966	3	20	139.41	34.9217	30	15.31	34.65	NA	NA	NA	NA	NA	5	24
1966	3	20	139.41	34.9217	50	15.31	34.65	NA	NA	NA	NA	NA	5	24
1966	3	20	139.41	34.9217	75	15.21	34.65	NA	NA	NA	NA	NA	5	24
1966	3	20	139.41	34.9217	100	15.05	34.65	NA	NA	NA	NA	NA	5	24
1966	3	20	139.41	34.9217	150	13.5	34.56	NA	NA	NA	NA	NA	5	24
1966	3	20	139.41	34.9217	200	11.75	34.47	NA	NA	NA	NA	NA	5	24
1966	3	20	139.41	34.9217	300	9.89	34.4	NA	NA	NA	NA	NA	5	24
1966	3	21	139.44	34.8733	0	15.1	34.67	NA	NA	NA	NA	NA	5	19
1966	3	21	139.44	34.8733	10	15.3	34.65	NA	NA	NA	NA	NA	5	19
1966	3	21	139.44	34.8733	20	15.2	34.67	NA	NA	NA	NA	NA	5	19
1966	3	21	139.44	34.8733	30	15.41	34.67	NA	NA	NA	NA	NA	5	19
1966	3	21	139.44	34.8733	50	15.41	34.65	NA	NA	NA	NA	NA	5	19
1966	3	21	139.44	34.8733	75	15.21	34.65	NA	NA	NA	NA	NA	5	19
1966	3	21	139.44	34.8733	100	14.7	34.61	NA	NA	NA	NA	NA	5	19
1966	3	21	139.44	34.8733	150	13.52	34.56	NA	NA	NA	NA	NA	5	19
1966	3	21	139.44	34.8733	200	11.95	34.65	NA	NA	NA	NA	NA	5	19
1966	3	21	139.44	34.8733	300	9.49	34.54	NA	NA	NA	NA	NA	5	19
1966	3	22	139.467	34.8248	0	15	34.65	NA	NA	NA	NA	NA	5	20
1966	3	22	139.467	34.8248	10	15.4	34.65	NA	NA	NA	NA	NA	5	20
1966	3	22	139.467	34.8248	20	15.2	34.65	NA	NA	NA	NA	NA	5	20
1966	3	22	139.467	34.8248	30	15.21	34.65	NA	NA	NA	NA	NA	5	20
1966	3	22	139.467	34.8248	50	15.18	34.63	NA	NA	NA	NA	NA	5	20
1966	3	22	139.467	34.8248	75	15.14	34.65	NA	NA	NA	NA	NA	5	20
1966	3	22	139.467	34.8248	100	15.04	34.65	NA	NA	NA	NA	NA	5	20
1966	3	22	139.467	34.8248	150	13.64	NA	NA	NA	NA	NA	NA	5	20
1966	3	22	139.467	34.8248	200	12.33	34.56	NA	NA	NA	NA	NA	5	20
1966	3	22	139.467	34.8248	300	9.54	34.49	NA	NA	NA	NA	NA	5	20
1966	3	23	139.534	34.858	0	15.2	34.34	NA	NA	NA	NA	NA	5	20
1966	3	23	139.534	34.858	10	15.6	34.63	NA	NA	NA	NA	NA	5	20
1966	3	23	139.534	34.858	20	15.5	34.65	NA	NA	NA	NA	NA	5	20
1966	3	23	139.534	34.858	30	15.3	34.65	NA	NA	NA	NA	NA	5	20
1966	3	23	139.534	34.858	50	15.3	34.63	NA	NA	NA	NA	NA	5	20
1966	3	23	139.534	34.858	75	15.11	34.65	NA	NA	NA	NA	NA	5	20
1966	3	23	139.534	34.858	100	14.68	34.63	NA	NA	NA	NA	NA	5	20
1966	3	23	139.534	34.858	150	13.69	34.61	NA	NA	NA	NA	NA	5	20
1966	3	23	139.534	34.858	200	12.57	34.58	NA	NA	NA	NA	NA	5	20
1966	3	23	139.534	34.858	300	9.89	34.51	NA	NA	NA	NA	NA	5	20
1966	3	24	139.598	34.891	0	14.8	34.36	NA	NA	NA	NA	NA	5	19
1966	3	24	139.598	34.891	10	15.3	34.61	NA	NA	NA	NA	NA	5	19
1966	3	24	139.598	34.891	20	15.2	34.61	NA	NA	NA	NA	NA	5	19
1966	3	24	139.598	34.891	30	15.1	34.63	NA	NA	NA	NA	NA	5	19
1966	3	24	139.598	34.891	50	15.1	34.63	NA	NA	NA	NA	NA	5	19
1966	3	24	139.598	34.891	75	15.11	34.63	NA	NA	NA	NA	NA	5	19
1966	3	24	139.598	34.891	100	15.05	NA	NA	NA	NA	NA	NA	5	19
1966	3	24	139.598	34.891	150	14	34.63	NA	NA	NA	NA	NA	5	19
1966	3	24	139.598	34.891	200	12.82	34.6	NA	NA	NA	NA	NA	5	19
1966	3	24	139.598	34.891	300	9.76	34.52	NA	NA	NA	NA	NA	5	19
1966	3	25	139.664	34.9222	0	15	34.34	NA	NA	NA	NA	NA	5	20
1966	3	25	139.664	34.9222	10	15.3	34.61	NA	NA	NA	NA	NA	5	20
1966	3	25	139.664	34.9222	20	15.3	34.61	NA	NA	NA	NA	NA	5	20
1966	3	25	139.664	34.9222	30	15.18	34.61	NA	NA	NA	NA	NA	5	20
1966	3	25	139.664	34.9222	50	15.18	NA	NA	NA	NA	NA	NA	5	20
1966	3	25	139.664	34.9222	75	15.18	34.61	NA	NA	NA	NA	NA	5	20
1966	3	25	139.664	34.9222	100	15.19	34.61	NA	NA	NA	NA	NA	5	20
1966	3	25	139.664	34.9222	150	13.9	34.65	NA	NA	NA	NA	NA	5	20
1966	3	25	139.664	34.9222	200	12.51	34.6	NA	NA	NA	NA	NA	5	20
1966	3	25	139.664	34.9222	300	10.35	34.51	NA	NA	NA	NA	NA	5	20
1966	3	26	139.722	34.9535	0	15	34.65	NA	NA	NA	NA	NA	5	18
1966	3	26	139.722	34.9535	10	15.4	34.65	NA	NA	NA	NA	NA	5	18
1966	3	26	139.722	34.9535	20	15.4	34.9	NA	NA	NA	NA	NA	5	18
1966	3	26	139.722	34.9535	30	15.2	34.63	NA	NA	NA	NA	NA	5	18
1966	3	26	139.722	34.9535	50	15.12	34.63	NA	NA	NA	NA	NA	5	18
1966	3	26	139.722	34.9535	75	15.11	34.63	NA	NA	NA	NA	NA	5	18
1966	3	26	139.722	34.9535	100	15.11	34.56	NA	NA	NA	NA	NA	5	18
1966	3	26	139.722	34.9535	150	13.85	34.52	NA	NA	NA	NA	NA	5	18
1966	3	26	139.722	34.9535	200	12.62	34.36	NA	NA	NA	NA	NA	5	18
1966	3	26	139.722	34.9535	300	9.23	34.67	NA	NA	NA	NA	NA	5	18
1966	3	27	139.704	35.1467	0	14.3	34.43	NA	NA	NA	NA	NA	6	11
1966	3	27	139.704	35.1467	10	14.5	34.51	NA	NA	NA	NA	NA	6	11
1966	3	27	139.704	35.1467	20	14.4	34.51	NA	NA	NA	NA	NA	6	11
1966	3	28	139.688	35.0517	0	14	34.09	NA	NA	NA	NA	NA	6	7
1966	3	28	139.688	35.0517	10	13.9	34.49	NA	NA	NA	NA	NA	6	7
1966	3	28	139.688	35.0517	20	13.9	34.52	NA	NA	NA	NA	NA	6	7
1966	3	28	139.688	35.0517	30	14	34.14	NA	NA	NA	NA	NA	6	7
1966	3	28	139.688	35.0517	50	14.61	34.56	NA	NA	NA	NA	NA	6	7
1966	3	28	139.688	35.0517	75	13.56	34.56	NA	NA	NA	NA	NA	6	7
1966	3	28	139.688	35.0517	100	13.01	34.52	NA	NA	NA	NA	NA	6	7
1966	3	28	139.688	35.0517	150	12.06	34.49	NA	NA	NA	NA	NA	6	7
1966	3	28	139.688	35.0517	200	11.08	34.45	NA	NA	NA	NA	NA	6	7
1966	3	29	139.754	35.0757	0	11.9	33.24	NA	NA	NA	NA	NA	6	4
1966	3	29	139.754	35.0757	10	12.4	33.22	NA	NA	NA	NA	NA	6	4
1966	3	29	139.754	35.0757	20	12.6	33.35	NA	NA	NA	NA	NA	6	4
1966	3	29	139.754	35.0757	30	13.1	33.62	NA	NA	NA	NA	NA	6	4
1966	3	3	139.364	35.2467	0	14.4	34.6	NA	NA	NA	NA	NA	5	17
1966	3	3	139.364	35.2467	10	15.1	34.58	NA	NA	NA	NA	NA	5	17
1966	3	3	139.364	35.2467	20	15.2	34.61	NA	NA	NA	NA	NA	5	17
1966	3	3	139.364	35.2467	30	15.2	34.61	NA	NA	NA	NA	NA	5	17
1966	3	3	139.364	35.2467	50	15.12	34.63	NA	NA	NA	NA	NA	5	17
1966	3	3	139.364	35.2467	75	14.53	34.63	NA	NA	NA	NA	NA	5	17
1966	3	3	139.364	35.2467	100	14.22	34.6	NA	NA	NA	NA	NA	5	17
1966	3	3	139.364	35.2467	150	13.19	34.61	NA	NA	NA	NA	NA	5	17
1966	3	30	139.753	35.3067	0	13	33.91	NA	NA	NA	NA	NA	6	5
1966	3	30	139.753	35.3067	10	13.6	33.95	NA	NA	NA	NA	NA	6	5
1966	3	30	139.753	35.3067	20	13.5	33.93	NA	NA	NA	NA	NA	6	5
1966	3	30	139.753	35.3067	30	13.2	33.96	NA	NA	NA	NA	NA	6	5
1966	3	30	139.753	35.3067	50	14.25	34.56	NA	NA	NA	NA	NA	6	5
1966	3	30	139.753	35.3067	75	13.82	34.58	NA	NA	NA	NA	NA	6	5
1966	3	30	139.753	35.3067	100	12.8	34.52	NA	NA	NA	NA	NA	6	5
1966	3	31	139.802	35.1517	0	14	34.36	NA	NA	NA	NA	NA	6	7
1966	3	31	139.802	35.1517	10	14.4	34.36	NA	NA	NA	NA	NA	6	7
1966	3	31	139.802	35.1517	20	14.3	34.36	NA	NA	NA	NA	NA	6	7
1966	3	31	139.802	35.1517	30	14.14	34.36	NA	NA	NA	NA	NA	6	7
1966	3	31	139.802	35.1517	50	13.98	34.47	NA	NA	NA	NA	NA	6	7
1966	3	31	139.802	35.1517	75	13.27	34.54	NA	NA	NA	NA	NA	6	7
1966	3	31	139.802	35.1517	100	12.89	34.52	NA	NA	NA	NA	NA	6	7
1966	3	32	139.682	35.18	0	13.6	34.07	NA	NA	NA	NA	NA	7	5
1966	3	32	139.682	35.18	10	14.2	34.43	NA	NA	NA	NA	NA	7	5
1966	3	32	139.682	35.18	20	14.31	34.47	NA	NA	NA	NA	NA	7	5
1966	3	32	139.682	35.18	30	14.36	34.51	NA	NA	NA	NA	NA	7	5
1966	3	32	139.682	35.18	50	13.92	34.52	NA	NA	NA	NA	NA	7	5
1966	3	32	139.682	35.18	75	13.18	34.6	NA	NA	NA	NA	NA	7	5
1966	3	32	139.682	35.18	100	12.58	34.51	NA	NA	NA	NA	NA	7	5
1966	3	4	139.275	35.2383	0	14.8	34.61	NA	NA	NA	NA	NA	6	13
1966	3	4	139.275	35.2383	10	15.1	34.61	NA	NA	NA	NA	NA	6	13
1966	3	4	139.275	35.2383	20	14.6	34.61	NA	NA	NA	NA	NA	6	13
1966	3	4	139.275	35.2383	30	15.15	34.61	NA	NA	NA	NA	NA	6	13
1966	3	4	139.275	35.2383	50	14.91	34.63	NA	NA	NA	NA	NA	6	13
1966	3	4	139.275	35.2383	75	14.02	34.58	NA	NA	NA	NA	NA	6	13
1966	3	5	139.181	35.2398	0	13.9	34.38	NA	NA	NA	NA	NA	6	13
1966	3	5	139.181	35.2398	10	15	34.04	NA	NA	NA	NA	NA	6	13
1966	3	5	139.181	35.2398	20	15.2	34.45	NA	NA	NA	NA	NA	6	13
1966	3	5	139.181	35.2398	30	14.8	34.54	NA	NA	NA	NA	NA	6	13
1966	3	5	139.181	35.2398	50	15.39	34.63	NA	NA	NA	NA	NA	6	13
1966	3	5	139.181	35.2398	75	14.29	34.6	NA	NA	NA	NA	NA	6	13
1966	3	5	139.181	35.2398	100	12.76	34.99	NA	NA	NA	NA	NA	6	13
1966	3	5	139.181	35.2398	150	12.05	34.47	NA	NA	NA	NA	NA	6	13
1966	3	5	139.181	35.2398	200	10.91	34.41	NA	NA	NA	NA	NA	6	13
1966	3	6	139.189	35.1398	0	14.4	34.2	NA	NA	NA	NA	NA	5	13
1966	3	6	139.189	35.1398	10	15	34.61	NA	NA	NA	NA	NA	5	13
1966	3	6	139.189	35.1398	20	14.99	34.6	NA	NA	NA	NA	NA	5	13
1966	3	6	139.189	35.1398	30	15.11	34.6	NA	NA	NA	NA	NA	5	13
1966	3	6	139.189	35.1398	50	15.16	34.61	NA	NA	NA	NA	NA	5	13
1966	3	7	139.272	35.1365	0	14.6	34.61	NA	NA	NA	NA	NA	5	12
1966	3	7	139.272	35.1365	10	15.1	34.63	NA	NA	NA	NA	NA	5	12
1966	3	7	139.272	35.1365	20	15.2	34.61	NA	NA	NA	NA	NA	5	12
1966	3	7	139.272	35.1365	30	15.1	34.65	NA	NA	NA	NA	NA	5	12
1966	3	7	139.272	35.1365	50	15.04	34.65	NA	NA	NA	NA	NA	5	12
1966	3	7	139.272	35.1365	75	14.28	34.6	NA	NA	NA	NA	NA	5	12
1966	3	7	139.272	35.1365	100	13.31	34.54	NA	NA	NA	NA	NA	5	12
1966	3	7	139.272	35.1365	150	11.8	34.47	NA	NA	NA	NA	NA	5	12
1966	3	8	139.303	35.1233	0	14.8	34.58	NA	NA	NA	NA	NA	5	12
1966	3	8	139.303	35.1233	10	15.2	34.58	NA	NA	NA	NA	NA	5	12
1966	3	8	139.303	35.1233	20	15	34.6	NA	NA	NA	NA	NA	5	12
1966	3	8	139.303	35.1233	30	15.26	34.58	NA	NA	NA	NA	NA	5	12
1966	3	8	139.303	35.1233	50	15.01	34.61	NA	NA	NA	NA	NA	5	12
1966	3	8	139.303	35.1233	75	14.56	34.61	NA	NA	NA	NA	NA	5	12
1966	3	8	139.303	35.1233	100	14	34.58	NA	NA	NA	NA	NA	5	12
1966	3	8	139.303	35.1233	150	12.38	34.47	NA	NA	NA	NA	NA	5	12
1966	3	9	139.371	35.1362	0	14.8	34.61	NA	NA	NA	NA	NA	5	14
1966	3	9	139.371	35.1362	10	15	34.6	NA	NA	NA	NA	NA	5	14
1966	3	9	139.371	35.1362	20	15	34.61	NA	NA	NA	NA	NA	5	14
1966	3	9	139.371	35.1362	30	15.01	34.61	NA	NA	NA	NA	NA	5	14
1966	3	9	139.371	35.1362	50	15.03	34.63	NA	NA	NA	NA	NA	5	14
1966	3	9	139.371	35.1362	75	14.8	34.61	NA	NA	NA	NA	NA	5	14
1966	3	9	139.371	35.1362	100	14.24	34.61	NA	NA	NA	NA	NA	5	14
1966	3	9	139.371	35.1362	150	12.36	34.49	NA	NA	NA	NA	NA	5	14
1966	4	1	139.547	35.253	0	15.2	34.38	NA	NA	NA	NA	NA	5	12
1966	4	1	139.547	35.253	10	15.3	34.34	NA	NA	NA	NA	NA	5	12
1966	4	1	139.547	35.253	20	15.3	34.36	NA	NA	NA	NA	NA	5	12
1966	4	1	139.547	35.253	30	15.4	34.36	NA	NA	NA	NA	NA	5	12
1966	4	1	139.547	35.253	50	14.8	34.49	NA	NA	NA	NA	NA	5	12
1966	4	10	139.455	35.1365	0	14.8	34.58	NA	NA	NA	NA	NA	5	22
1966	4	10	139.455	35.1365	10	14.8	34.56	NA	NA	NA	NA	NA	5	22
1966	4	10	139.455	35.1365	20	14.7	34.56	NA	NA	NA	NA	NA	5	22
1966	4	10	139.455	35.1365	30	14.9	34.58	NA	NA	NA	NA	NA	5	22
1966	4	10	139.455	35.1365	50	13.86	34.6	NA	NA	NA	NA	NA	5	22
1966	4	10	139.455	35.1365	75	13.58	34.58	NA	NA	NA	NA	NA	5	22
1966	4	10	139.455	35.1365	100	13.49	34.58	NA	NA	NA	NA	NA	5	22
1966	4	10	139.455	35.1365	150	12.65	34.54	NA	NA	NA	NA	NA	5	22
1966	4	10	139.455	35.1365	200	11.81	34.51	NA	NA	NA	NA	NA	5	22
1966	4	10	139.455	35.1365	0	13.9	34.58	NA	NA	NA	NA	NA	5	22
1966	4	10	139.455	35.1365	10	14.8	34.56	NA	NA	NA	NA	NA	5	22
1966	4	10	139.455	35.1365	20	14.7	34.56	NA	NA	NA	NA	NA	5	22
1966	4	10	139.455	35.1365	30	14.9	34.58	NA	NA	NA	NA	NA	5	22
1966	4	10	139.455	35.1365	50	13.86	34.6	NA	NA	NA	NA	NA	5	22
1966	4	11	139.487	35.1283	0	14.6	34.52	NA	NA	NA	NA	NA	5	17
1966	4	11	139.487	35.1283	10	15.8	34.52	NA	NA	NA	NA	NA	5	17
1966	4	11	139.487	35.1283	20	14.5	34.54	NA	NA	NA	NA	NA	5	17
1966	4	11	139.487	35.1283	30	14.5	34.56	NA	NA	NA	NA	NA	5	17
1966	4	11	139.487	35.1283	50	13.57	34.58	NA	NA	NA	NA	NA	5	17
1966	4	11	139.487	35.1283	75	13.25	34.56	NA	NA	NA	NA	NA	5	17
1966	4	11	139.487	35.1283	100	13.09	34.56	NA	NA	NA	NA	NA	5	17
1966	4	11	139.487	35.1283	150	12.06	34.51	NA	NA	NA	NA	NA	5	17
1966	4	11	139.487	35.1283	200	11.18	34.47	NA	NA	NA	NA	NA	5	17
1966	4	112	139.797	35.4543	0	15.2	28.37	NA	NA	NA	NA	NA	NA	NA
1966	4	112	139.797	35.4543	10	12.57	32.54	NA	NA	NA	NA	NA	NA	NA
1966	4	112	139.797	35.4543	20	13.38	33.46	NA	NA	NA	NA	NA	NA	NA
1966	4	117	139.738	35.4543	0	15.3	29.54	NA	NA	NA	NA	NA	NA	NA
1966	4	117	139.738	35.4543	10	12.37	31.59	NA	NA	NA	NA	NA	NA	NA
1966	4	117	139.738	35.4543	20	13.65	32.83	NA	NA	NA	NA	NA	NA	NA
1966	4	118	139.738	35.4118	0	14.8	30.04	NA	NA	NA	NA	NA	NA	NA
1966	4	118	139.738	35.4118	10	12.2	31.58	NA	NA	NA	NA	NA	NA	NA
1966	4	118	139.738	35.4118	20	13.56	33.68	NA	NA	NA	NA	NA	NA	NA
1966	4	12	139.547	35.1365	0	16.3	34.65	NA	NA	NA	NA	NA	5	18
1966	4	12	139.547	35.1365	10	16.2	34.65	NA	NA	NA	NA	NA	5	18
1966	4	12	139.547	35.1365	20	15.8	34.63	NA	NA	NA	NA	NA	5	18
1966	4	12	139.547	35.1365	30	15	34.56	NA	NA	NA	NA	NA	5	18
1966	4	12	139.547	35.1365	50	14.23	34.54	NA	NA	NA	NA	NA	5	18
1966	4	12	139.547	35.1365	75	13.82	34.58	NA	NA	NA	NA	NA	5	18
1966	4	12	139.547	35.1365	100	13.58	34.58	NA	NA	NA	NA	NA	5	18
1966	4	123	139.692	35.3845	0	12.3	30.08	NA	NA	NA	NA	NA	NA	NA
1966	4	123	139.692	35.3845	10	12.12	31.56	NA	NA	NA	NA	NA	NA	NA
1966	4	123	139.692	35.3845	20	13.24	33.24	NA	NA	NA	NA	NA	NA	NA
1966	4	123	139.692	35.3845	30	13.94	33.07	NA	NA	NA	NA	NA	NA	NA
1966	4	124	139.69	35.3358	10	12.37	31.61	NA	NA	NA	NA	NA	NA	NA
1966	4	129	139.716	35.287	0	13.6	31.49	NA	NA	NA	NA	NA	NA	NA
1966	4	129	139.716	35.287	10	12.31	32.11	NA	NA	NA	NA	NA	NA	NA
1966	4	129	139.716	35.287	20	13.74	32.76	NA	NA	NA	NA	NA	NA	NA
1966	4	129	139.716	35.287	30	14.04	34.25	NA	NA	NA	NA	NA	NA	NA
1966	4	129	139.716	35.287	50	14.01	34.25	NA	NA	NA	NA	NA	NA	NA
1966	4	13	139.605	35.1123	0	14	34.13	NA	NA	NA	NA	NA	7	7
1966	4	13	139.605	35.1123	10	15.1	34.31	NA	NA	NA	NA	NA	7	7
1966	4	13	139.605	35.1123	20	15.1	34.32	NA	NA	NA	NA	NA	7	7
1966	4	134	139.751	35.2388	0	13.7	31.87	NA	NA	NA	NA	NA	NA	NA
1966	4	134	139.751	35.2388	10	12.6	32.61	NA	NA	NA	NA	NA	NA	NA
1966	4	134	139.751	35.2388	20	13.97	34.72	NA	NA	NA	NA	NA	NA	NA
1966	4	14	139.65	35.0545	0	15.4	34.29	NA	NA	NA	NA	NA	5	14
1966	4	14	139.65	35.0545	10	15.94	34.47	NA	NA	NA	NA	NA	5	14
1966	4	14	139.65	35.0545	20	15.78	34.7	NA	NA	NA	NA	NA	5	14
1966	4	14	139.65	35.0545	30	15.78	34.7	NA	NA	NA	NA	NA	5	14
1966	4	14	139.65	35.0545	50	15.28	34.67	NA	NA	NA	NA	NA	5	14
1966	4	14	139.65	35.0545	75	14.34	34.67	NA	NA	NA	NA	NA	5	14
1966	4	15	139.685	35.013	0	16.7	34.76	NA	NA	NA	NA	NA	4	18
1966	4	15	139.685	35.013	10	16.8	34.76	NA	NA	NA	NA	NA	4	18
1966	4	15	139.685	35.013	20	16.6	34.72	NA	NA	NA	NA	NA	4	18
1966	4	15	139.685	35.013	30	15.8	34.67	NA	NA	NA	NA	NA	4	18
1966	4	15	139.685	35.013	50	15.41	34.65	NA	NA	NA	NA	NA	4	18
1966	4	15	139.685	35.013	75	14.85	NA	NA	NA	NA	NA	NA	4	18
1966	4	15	139.685	35.013	100	13.81	34.6	NA	NA	NA	NA	NA	4	18
1966	4	15	139.685	35.013	150	13.37	34.58	NA	NA	NA	NA	NA	4	18
1966	4	15	139.685	35.013	200	12.68	34.56	NA	NA	NA	NA	NA	4	18
1966	4	16	139.566	35.0948	0	17.7	34.81	NA	NA	NA	NA	NA	6	15
1966	4	16	139.566	35.0948	10	17.9	34.81	NA	NA	NA	NA	NA	6	15
1966	4	16	139.566	35.0948	20	17.5	34.78	NA	NA	NA	NA	NA	6	15
1966	4	16	139.566	35.0948	30	17.04	34.78	NA	NA	NA	NA	NA	6	15
1966	4	16	139.566	35.0948	50	17	34.78	NA	NA	NA	NA	NA	6	15
1966	4	16	139.566	35.0948	75	15.76	34.69	NA	NA	NA	NA	NA	6	15
1966	4	16	139.566	35.0948	100	15.22	34.63	NA	NA	NA	NA	NA	6	15
1966	4	17	139.505	35.0548	0	17.9	34.79	NA	NA	NA	NA	NA	6	16
1966	4	17	139.505	35.0548	10	17.4	34.81	NA	NA	NA	NA	NA	6	16
1966	4	17	139.505	35.0548	20	16.7	34.72	NA	NA	NA	NA	NA	6	16
1966	4	17	139.505	35.0548	30	16.9	34.76	NA	NA	NA	NA	NA	6	16
1966	4	17	139.505	35.0548	50	15.8	34.69	NA	NA	NA	NA	NA	6	16
1966	4	18	139.439	35.0132	0	18.7	34.85	NA	NA	NA	NA	NA	6	14
1966	4	18	139.439	35.0132	10	18.5	34.81	NA	NA	NA	NA	NA	6	14
1966	4	18	139.439	35.0132	20	17.4	34.76	NA	NA	NA	NA	NA	6	14
1966	4	18	139.439	35.0132	30	17	34.74	NA	NA	NA	NA	NA	6	14
1966	4	18	139.439	35.0132	50	16.34	34.74	NA	NA	NA	NA	NA	6	14
1966	4	18	139.439	35.0132	75	14.92	34.67	NA	NA	NA	NA	NA	6	14
1966	4	18	139.439	35.0132	100	14.74	34.65	NA	NA	NA	NA	NA	6	14
1966	4	18	139.439	35.0132	150	13.97	34.6	NA	NA	NA	NA	NA	6	14
1966	4	18	139.439	35.0132	200	13.19	34.58	NA	NA	NA	NA	NA	6	14
1966	4	19	139.374	34.9737	0	19.2	34.83	NA	NA	NA	NA	NA	7	17
1966	4	19	139.374	34.9737	10	18.8	34.83	NA	NA	NA	NA	NA	7	17
1966	4	19	139.374	34.9737	20	18.2	34.79	NA	NA	NA	NA	NA	7	17
1966	4	19	139.374	34.9737	30	17.5	34.76	NA	NA	NA	NA	NA	7	17
1966	4	19	139.374	34.9737	50	16.39	34.72	NA	NA	NA	NA	NA	7	17
1966	4	19	139.374	34.9737	75	15.6	34.7	NA	NA	NA	NA	NA	7	17
1966	4	19	139.374	34.9737	100	14.55	34.65	NA	NA	NA	NA	NA	7	17
1966	4	19	139.374	34.9737	150	13.82	34.61	NA	NA	NA	NA	NA	7	17
1966	4	19	139.374	34.9737	200	12.6	34.54	NA	NA	NA	NA	NA	7	17
1966	4	2	139.455	35.25	0	14.8	34.49	NA	NA	NA	NA	NA	5	11
1966	4	2	139.455	35.25	10	15.9	34.47	NA	NA	NA	NA	NA	5	11
1966	4	2	139.455	35.25	20	15.3	34.38	NA	NA	NA	NA	NA	5	11
1966	4	2	139.455	35.25	30	16.5	34.41	NA	NA	NA	NA	NA	5	11
1966	4	2	139.455	35.25	50	14.88	34.41	NA	NA	NA	NA	NA	5	11
1966	4	2	139.455	35.25	75	14.56	34.36	NA	NA	NA	NA	NA	5	11
1966	4	2	139.455	35.25	100	14.75	34.56	NA	NA	NA	NA	NA	5	11
1966	4	20	139.41	34.9217	0	18.5	34.87	NA	NA	NA	NA	NA	6	15
1966	4	20	139.41	34.9217	10	18.8	34.81	NA	NA	NA	NA	NA	6	15
1966	4	20	139.41	34.9217	20	18.4	34.79	NA	NA	NA	NA	NA	6	15
1966	4	20	139.41	34.9217	30	17.6	34.76	NA	NA	NA	NA	NA	6	15
1966	4	20	139.41	34.9217	50	16.15	34.72	NA	NA	NA	NA	NA	6	15
1966	4	20	139.41	34.9217	75	15.04	34.63	NA	NA	NA	NA	NA	6	15
1966	4	20	139.41	34.9217	100	14.25	34.6	NA	NA	NA	NA	NA	6	15
1966	4	20	139.41	34.9217	150	13.43	34.58	NA	NA	NA	NA	NA	6	15
1966	4	20	139.41	34.9217	200	12.12	34.52	NA	NA	NA	NA	NA	6	15
1966	4	21	139.44	34.8733	0	17	34.76	NA	NA	NA	NA	NA	6	16
1966	4	21	139.44	34.8733	10	17	34.76	NA	NA	NA	NA	NA	6	16
1966	4	21	139.44	34.8733	20	16.4	34.72	NA	NA	NA	NA	NA	6	16
1966	4	21	139.44	34.8733	30	16.2	34.69	NA	NA	NA	NA	NA	6	16
1966	4	21	139.44	34.8733	50	15.11	34.65	NA	NA	NA	NA	NA	6	16
1966	4	21	139.44	34.8733	75	14.92	34.63	NA	NA	NA	NA	NA	6	16
1966	4	21	139.44	34.8733	100	14.08	34.6	NA	NA	NA	NA	NA	6	16
1966	4	21	139.44	34.8733	150	13.28	34.58	NA	NA	NA	NA	NA	6	16
1966	4	21	139.44	34.8733	200	12.05	34.52	NA	NA	NA	NA	NA	6	16
1966	4	22	139.467	34.8248	0	15.8	34.74	NA	NA	NA	NA	NA	4	19
1966	4	22	139.467	34.8248	10	15.2	34.72	NA	NA	NA	NA	NA	4	19
1966	4	22	139.467	34.8248	20	15.2	34.72	NA	NA	NA	NA	NA	4	19
1966	4	22	139.467	34.8248	30	15.86	34.7	NA	NA	NA	NA	NA	4	19
1966	4	22	139.467	34.8248	50	15.12	34.67	NA	NA	NA	NA	NA	4	19
1966	4	22	139.467	34.8248	75	14.52	34.61	NA	NA	NA	NA	NA	4	19
1966	4	22	139.467	34.8248	100	14.04	34.58	NA	NA	NA	NA	NA	4	19
1966	4	22	139.467	34.8248	150	12.7	34.54	NA	NA	NA	NA	NA	4	19
1966	4	23	139.534	34.858	0	16.8	34.79	NA	NA	NA	NA	NA	4	19
1966	4	23	139.534	34.858	10	16.76	34.76	NA	NA	NA	NA	NA	4	19
1966	4	23	139.534	34.858	20	16.37	34.74	NA	NA	NA	NA	NA	4	19
1966	4	23	139.534	34.858	30	15.96	34.72	NA	NA	NA	NA	NA	4	19
1966	4	23	139.534	34.858	50	15.32	34.69	NA	NA	NA	NA	NA	4	19
1966	4	23	139.534	34.858	75	14.97	34.67	NA	NA	NA	NA	NA	4	19
1966	4	23	139.534	34.858	100	14.66	34.65	NA	NA	NA	NA	NA	4	19
1966	4	23	139.534	34.858	150	14.21	34.63	NA	NA	NA	NA	NA	4	19
1966	4	24	139.598	34.891	0	16.6	34.78	NA	NA	NA	NA	NA	4	19
1966	4	24	139.598	34.891	10	16.87	34.76	NA	NA	NA	NA	NA	4	19
1966	4	24	139.598	34.891	20	16.63	34.74	NA	NA	NA	NA	NA	4	19
1966	4	24	139.598	34.891	30	16	34.74	NA	NA	NA	NA	NA	4	19
1966	4	24	139.598	34.891	50	15.12	34.7	NA	NA	NA	NA	NA	4	19
1966	4	24	139.598	34.891	75	15.12	34.67	NA	NA	NA	NA	NA	4	19
1966	4	24	139.598	34.891	100	14.8	34.65	NA	NA	NA	NA	NA	4	19
1966	4	24	139.598	34.891	150	14.44	34.63	NA	NA	NA	NA	NA	4	19
1966	4	25	139.664	34.9222	0	16.4	34.78	NA	NA	NA	NA	NA	4	7
1966	4	25	139.664	34.9222	10	16.69	34.72	NA	NA	NA	NA	NA	4	7
1966	4	25	139.664	34.9222	20	16.49	34.72	NA	NA	NA	NA	NA	4	7
1966	4	25	139.664	34.9222	30	16.41	34.72	NA	NA	NA	NA	NA	4	7
1966	4	25	139.664	34.9222	50	15.98	34.72	NA	NA	NA	NA	NA	4	7
1966	4	25	139.664	34.9222	75	15.4	34.7	NA	NA	NA	NA	NA	4	7
1966	4	25	139.664	34.9222	100	15.45	34.69	NA	NA	NA	NA	NA	4	7
1966	4	25	139.664	34.9222	150	14.4	34.63	NA	NA	NA	NA	NA	4	7
1966	4	26	139.722	34.9535	0	16.4	34.78	NA	NA	NA	NA	NA	5	18
1966	4	26	139.722	34.9535	10	16.54	34.74	NA	NA	NA	NA	NA	5	18
1966	4	26	139.722	34.9535	20	15.9	34.7	NA	NA	NA	NA	NA	5	18
1966	4	26	139.722	34.9535	30	15.84	34.7	NA	NA	NA	NA	NA	5	18
1966	4	26	139.722	34.9535	50	15.2	34.67	NA	NA	NA	NA	NA	5	18
1966	4	27	139.704	35.1467	0	15.2	34.69	NA	NA	NA	NA	NA	4	21
1966	4	27	139.704	35.1467	10	15.3	34.65	NA	NA	NA	NA	NA	4	21
1966	4	27	139.704	35.1467	20	15.39	34.67	NA	NA	NA	NA	NA	4	21
1966	4	27	139.704	35.1467	30	15.18	34.65	NA	NA	NA	NA	NA	4	21
1966	4	28	139.688	35.0517	0	15.2	34.67	NA	NA	NA	NA	NA	5	14
1966	4	28	139.688	35.0517	10	15.8	34.58	NA	NA	NA	NA	NA	5	14
1966	4	28	139.688	35.0517	20	15.46	34.6	NA	NA	NA	NA	NA	5	14
1966	4	28	139.688	35.0517	30	14.64	34.6	NA	NA	NA	NA	NA	5	14
1966	4	28	139.688	35.0517	50	14.73	34.6	NA	NA	NA	NA	NA	5	14
1966	4	28	139.688	35.0517	75	14.18	34.6	NA	NA	NA	NA	NA	5	14
1966	4	28	139.688	35.0517	100	13.8	34.6	NA	NA	NA	NA	NA	5	14
1966	4	28	139.688	35.0517	150	12.91	34.56	NA	NA	NA	NA	NA	5	14
1966	4	29	139.754	35.0757	0	14.2	34.13	NA	NA	NA	NA	NA	6	10
1966	4	29	139.754	35.0757	10	14.7	34.16	NA	NA	NA	NA	NA	6	10
1966	4	29	139.754	35.0757	20	14.92	34.27	NA	NA	NA	NA	NA	6	10
1966	4	29	139.754	35.0757	30	15.13	34.56	NA	NA	NA	NA	NA	6	10
1966	4	29	139.754	35.0757	50	14.86	34.6	NA	NA	NA	NA	NA	6	10
1966	4	29	139.754	35.0757	75	14.3	34.58	NA	NA	NA	NA	NA	6	10
1966	4	3	139.364	35.2467	0	15.7	34.56	NA	NA	NA	NA	NA	4	15
1966	4	3	139.364	35.2467	10	15.8	34.56	NA	NA	NA	NA	NA	4	15
1966	4	3	139.364	35.2467	20	15.4	34.49	NA	NA	NA	NA	NA	4	15
1966	4	3	139.364	35.2467	30	15.9	34.52	NA	NA	NA	NA	NA	4	15
1966	4	3	139.364	35.2467	50	14.58	34.4	NA	NA	NA	NA	NA	4	15
1966	4	3	139.364	35.2467	75	14.68	34.47	NA	NA	NA	NA	NA	4	15
1966	4	3	139.364	35.2467	100	14.71	34.4	NA	NA	NA	NA	NA	4	15
1966	4	3	139.364	35.2467	150	14.23	34.56	NA	NA	NA	NA	NA	4	15
1966	4	3	139.364	35.2467	200	13.25	34.52	NA	NA	NA	NA	NA	4	15
1966	4	30	139.753	35.3067	0	14	33.11	NA	NA	NA	NA	NA	NA	3
1966	4	30	139.753	35.3067	10	14.2	33.57	NA	NA	NA	NA	NA	NA	3
1966	4	30	139.753	35.3067	20	14.9	34.2	NA	NA	NA	NA	NA	NA	3
1966	4	30	139.753	35.3067	30	14.72	34.41	NA	NA	NA	NA	NA	NA	3
1966	4	30	139.753	35.3067	50	14.5	34.56	NA	NA	NA	NA	NA	NA	3
1966	4	30	139.753	35.3067	75	14.26	34.6	NA	NA	NA	NA	NA	NA	3
1966	4	30	139.753	35.3067	100	14.07	34.6	NA	NA	NA	NA	NA	NA	3
1966	4	30	139.753	35.3067	150	13.82	34.6	NA	NA	NA	NA	NA	NA	3
1966	4	30	139.753	35.3067	200	13.34	34.58	NA	NA	NA	NA	NA	NA	3
1966	4	31	139.802	35.1517	0	14.5	33.91	NA	NA	NA	NA	NA	7	9
1966	4	31	139.802	35.1517	10	15.3	34.54	NA	NA	NA	NA	NA	7	9
1966	4	31	139.802	35.1517	20	14.9	34.51	NA	NA	NA	NA	NA	7	9
1966	4	31	139.802	35.1517	30	14.9	34.58	NA	NA	NA	NA	NA	7	9
1966	4	31	139.802	35.1517	50	14.8	34.6	NA	NA	NA	NA	NA	7	9
1966	4	32	139.682	35.18	0	13.1	32.63	NA	NA	NA	NA	NA	NA	2
1966	4	32	139.682	35.18	10	14.6	32.66	NA	NA	NA	NA	NA	NA	2
1966	4	32	139.682	35.18	20	14.6	34.27	NA	NA	NA	NA	NA	NA	2
1966	4	4	139.275	35.2383	0	15.4	NA	NA	NA	NA	NA	NA	5	16
1966	4	4	139.275	35.2383	10	15.5	34.51	NA	NA	NA	NA	NA	5	16
1966	4	4	139.275	35.2383	20	15.5	34.51	NA	NA	NA	NA	NA	5	16
1966	4	4	139.275	35.2383	30	15.3	34.52	NA	NA	NA	NA	NA	5	16
1966	4	4	139.275	35.2383	75	14.19	34.43	NA	NA	NA	NA	NA	5	16
1966	4	4	139.275	35.2383	100	13.75	34.38	NA	NA	NA	NA	NA	5	16
1966	4	5	139.181	35.2398	0	15.4	32.99	NA	NA	NA	NA	NA	7	5
1966	4	5	139.181	35.2398	10	15.4	34.25	NA	NA	NA	NA	NA	7	5
1966	4	5	139.181	35.2398	20	15.3	34.18	NA	NA	NA	NA	NA	7	5
1966	4	5	139.181	35.2398	30	14.9	34.36	NA	NA	NA	NA	NA	7	5
1966	4	5	139.181	35.2398	50	14.51	34.4	NA	NA	NA	NA	NA	7	5
1966	4	5	139.181	35.2398	75	14.35	34.41	NA	NA	NA	NA	NA	7	5
1966	4	5	139.181	35.2398	100	13.27	34.43	NA	NA	NA	NA	NA	7	5
1966	4	5	139.181	35.2398	150	13.26	34.54	NA	NA	NA	NA	NA	7	5
1966	4	5	139.181	35.2398	200	12.09	34.99	NA	NA	NA	NA	NA	7	5
1966	4	6	139.189	35.1398	0	14.6	34.4	NA	NA	NA	NA	NA	7	4
1966	4	6	139.189	35.1398	10	14.4	34.29	NA	NA	NA	NA	NA	7	4
1966	4	6	139.189	35.1398	20	14.7	34.87	NA	NA	NA	NA	NA	7	4
1966	4	6	139.189	35.1398	30	14.21	34.2	NA	NA	NA	NA	NA	7	4
1966	4	6	139.189	35.1398	50	14.3	34.41	NA	NA	NA	NA	NA	7	4
1966	4	6	139.189	35.1398	75	14.03	34.47	NA	NA	NA	NA	NA	7	4
1966	4	7	139.272	35.1365	0	15.2	34.32	NA	NA	NA	NA	NA	5	15
1966	4	7	139.272	35.1365	10	15.7	34.54	NA	NA	NA	NA	NA	5	15
1966	4	7	139.272	35.1365	20	15.6	34.54	NA	NA	NA	NA	NA	5	15
1966	4	7	139.272	35.1365	30	15.5	34.43	NA	NA	NA	NA	NA	5	15
1966	4	7	139.272	35.1365	50	14.41	34.41	NA	NA	NA	NA	NA	5	15
1966	4	7	139.272	35.1365	75	13.95	34.38	NA	NA	NA	NA	NA	5	15
1966	4	7	139.272	35.1365	100	13.89	34.41	NA	NA	NA	NA	NA	5	15
1966	4	7	139.272	35.1365	150	13.48	34.54	NA	NA	NA	NA	NA	5	15
1966	4	7	139.272	35.1365	200	12.3	34.51	NA	NA	NA	NA	NA	5	15
1966	4	8	139.303	35.1233	0	15.6	34.63	NA	NA	NA	NA	NA	5	19
1966	4	8	139.303	35.1233	10	15.8	34.63	NA	NA	NA	NA	NA	5	19
1966	4	8	139.303	35.1233	20	15.8	34.63	NA	NA	NA	NA	NA	5	19
1966	4	8	139.303	35.1233	30	15.8	34.63	NA	NA	NA	NA	NA	5	19
1966	4	8	139.303	35.1233	50	14.51	34.52	NA	NA	NA	NA	NA	5	19
1966	4	8	139.303	35.1233	75	14.48	34.54	NA	NA	NA	NA	NA	5	19
1966	4	8	139.303	35.1233	100	13.81	34.56	NA	NA	NA	NA	NA	5	19
1966	4	8	139.303	35.1233	150	13.27	34.56	NA	NA	NA	NA	NA	5	19
1966	4	8	139.303	35.1233	200	12.05	34.51	NA	NA	NA	NA	NA	5	19
1966	4	9	139.371	35.1362	0	14.8	34.6	NA	NA	NA	NA	NA	4	25
1966	4	9	139.371	35.1362	10	15.3	34.56	NA	NA	NA	NA	NA	4	25
1966	4	9	139.371	35.1362	20	15.3	34.56	NA	NA	NA	NA	NA	4	25
1966	4	9	139.371	35.1362	30	15.2	34.56	NA	NA	NA	NA	NA	4	25
1966	4	9	139.371	35.1362	50	14.4	34.56	NA	NA	NA	NA	NA	4	25
1966	4	9	139.371	35.1362	75	13.93	34.58	NA	NA	NA	NA	NA	4	25
[truncated: 172,543 more rows]
